# Supplementary material
Source: MDPI journal article supplement (https://www.mdpi.com/2076-3417/12/21/10691)
Supplement: s1 [file s1]

Archive with 2 entries (2 files):
- Supple_Figures_S1_S3.pdf
- Supplementary_Tables_S1_S9.xlsx
