# Supplementary material
Source: MDPI journal article supplement (https://www.mdpi.com/2076-3417/12/21/10691)
Supplement: s1 [file s1 › Supple_Figures_S1_S3.pdf]

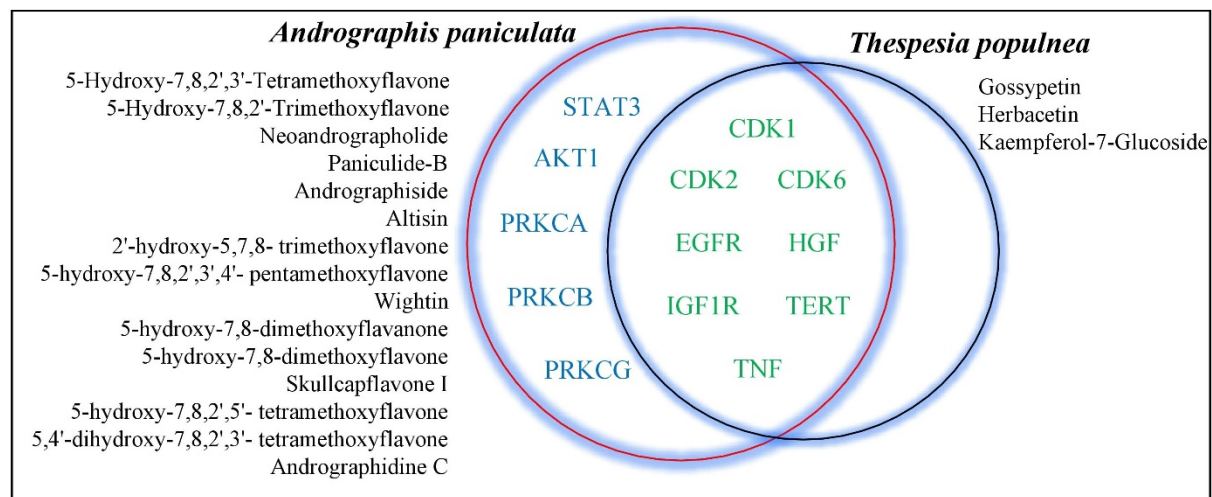

**Figure S1.** Venn diagram represents the modulated protein targets involved in HBV-induced HCC by the phytochemicals from *Andrographis paniculata* and *Thespesia populnea*.

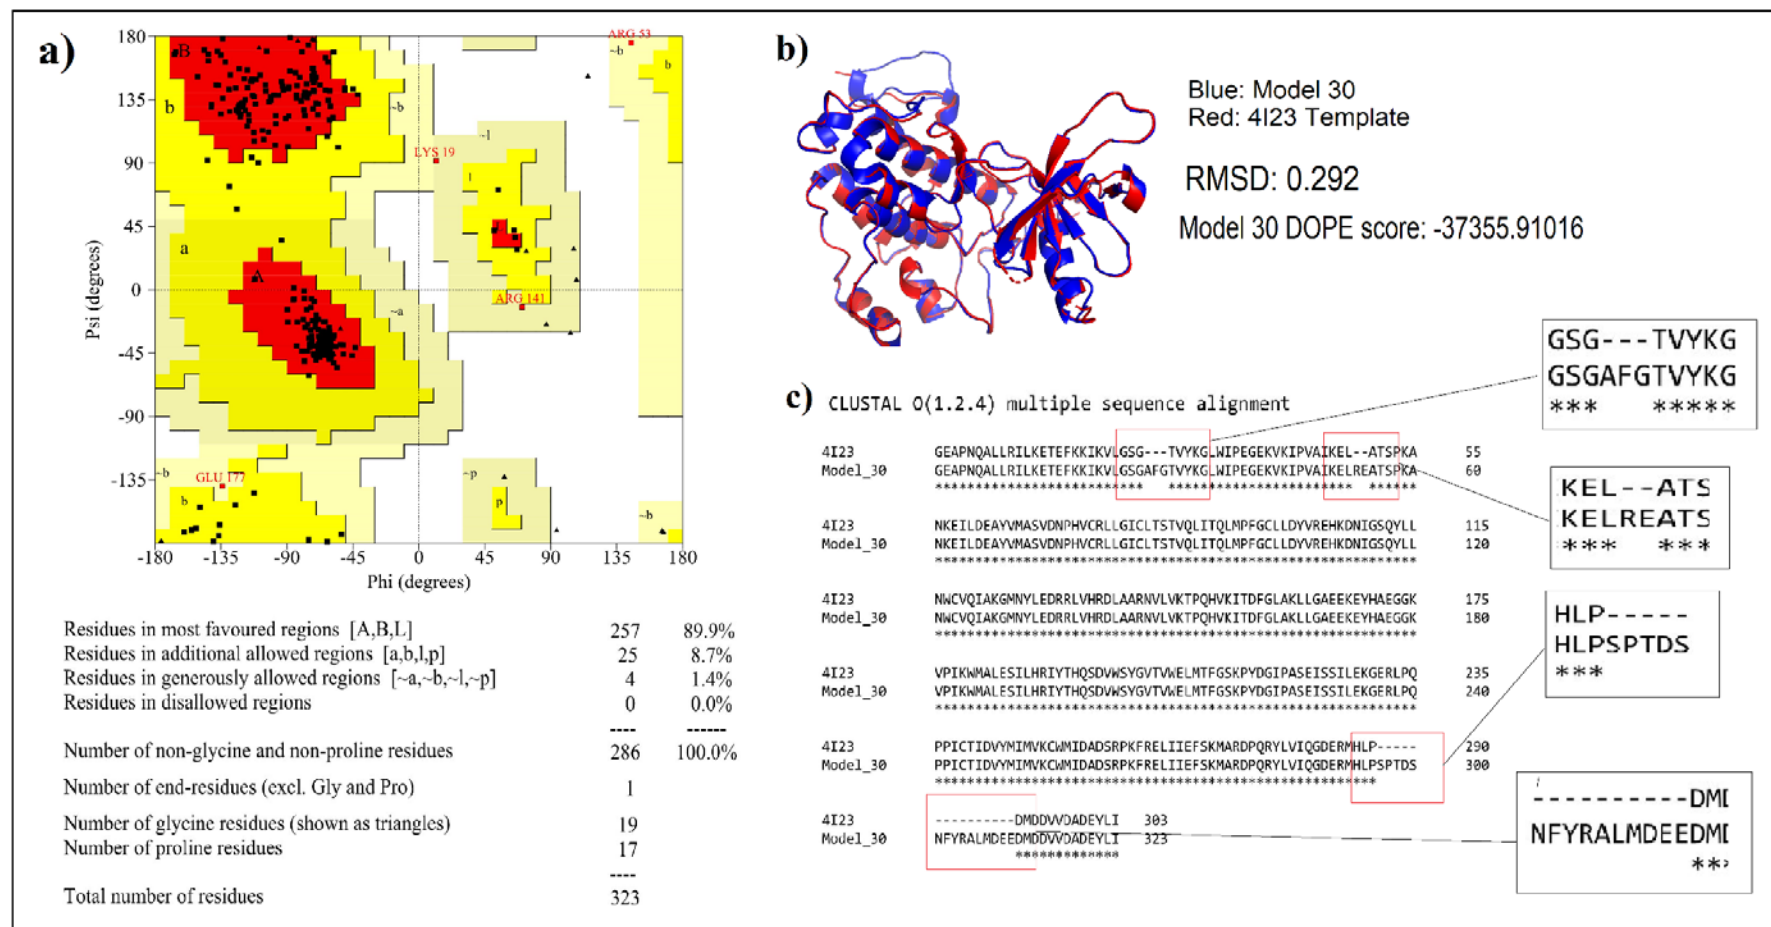

**Figure S2.** WT- *EGFR* model 30. a) Ramachandran plot for amino acid distribution b) PyMOL superimpose (Red: Template (PDB file 4I23) and Blue: Model 30), c) Clustal W template and model 30 alignment.

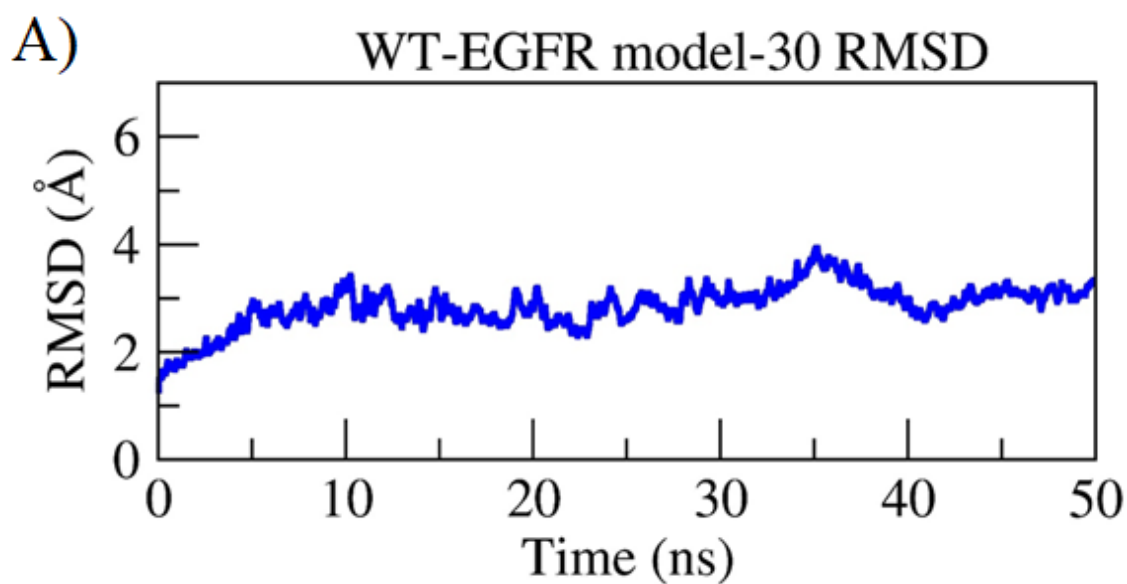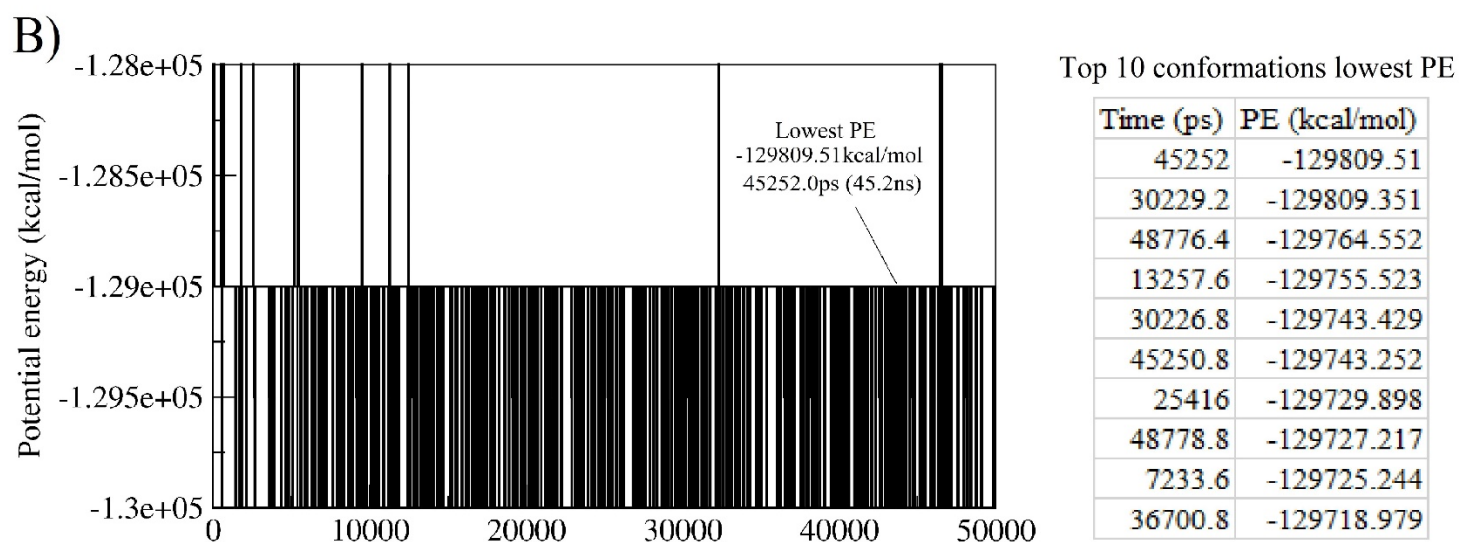

**Figure S3.** WT-EGFR model-30 RMSD plot showing the deviation (A) and minimum energy conformation observed at 45252.0<sup>th</sup>ps (-129809.51kcal/mol) (B).
