# Supplementary material
Source: MDPI journal article supplement (https://www.mdpi.com/2076-3417/12/21/10691)
Supplement: s1 [file s1 › Supplementary_Tables_S1_S9.xlsx]

## Sheet: Table S1
Table S1: List of references for the selected medicinal plant for the treatment of hepatitis like illness including Jaundice, Hepatitis, fever, inflammation and for hepatoprotective and antiviral potential
Medicinal Plants	Ayurvedic/common name	References
Achyranthes aspera	Apamarga	Khan N, Akhtar MS, Khan BA, Braga Vde A, Reich A. Antiobesity, hypolipidemic, antioxidant and hepatoprotective effects of Achyranthes aspera seed saponins in high cholesterol fed albino rats. Arch Med Sci. 2015 Dec 10;11(6):1261-71. doi: 10.5114/aoms.2015.56353. Epub 2015 Dec 11. PMID: 26788089; PMCID: PMC4697059.
		Mukherjee H, Ojha D, Bag P, Chandel HS, Bhattacharyya S, Chatterjee TK, Mukherjee PK, Chakraborti S, Chattopadhyay D. Anti-herpes virus activities of Achyranthes aspera: an Indian ethnomedicine, and its triterpene acid. Microbiological research. 2013 May 6;168(4):238-44.
		Alagesaboopathi C. Ethnomedicinal plants and their utilization by villagers in Kumaragiri Hills of Salem district of Tamilnadu, India. Afr J Tradit Complement Altern Med. 2009 May 7;6(3):222-7. doi: 10.4314/ajtcam.v6i3.57157. PMID: 20448846; PMCID: PMC2816461.
		Fahim NF, Sathi ZS. Assesment of hepatoprotective activity of roots and barks of Achyranthes aspera in carbon tetrachloride-induced hepatotoxicity in rats. Malays. J. Halal Res. 2018;1(2):23-6.
		Martinez JL, Muñoz-Acevedo A, Rai M, editors. Ethnobotany: Application of Medicinal Plants. CRC Press; 2018 Dec 7. Page. 168
Aerva lanata	Gorakshaganja	Rao S, Ramakrishna A. Indian Medicinal Plants: Uses and Propagation Aspects. CRC Press; 2020 Oct 26. Page 23.
		Manokaran S, Jaswanth A, Sengottuvelu S, Nandhakumar J, Duraisamy R, Karthikeyan D, Mallegaswari R. Hepatoprotective activity of Aerva lanata Linn. against paracetamol induced hepatotoxicity in rats. Research journal of pharmacy and technology. 2008;1(4):398-400.
		Gujjeti RP, Mamidala E. Anti-HIV activity and cytotoxic effects of Aerva lanata root extracts. American Journal of Phytomedicine and Clinical Therapeutics. 2014;2(7):894-900.
		Nevin KG, Vijayammal PL. Effect of Aerva lanata against hepatotoxicity of carbon tetrachloride in rats. Environmental Toxicology and Pharmacology. 2005 Nov 1;20(3):471-7.
Aloe vera	Kumari	Chandan BK, Saxena AK, Shukla S, Sharma N, Gupta DK, Suri KA, Suri J, Bhadauria M, Singh B. Hepatoprotective potential of Aloe barbadensis Mill. against carbon tetrachloride induced hepatotoxicity. Journal of Ethnopharmacology. 2007 May 22;111(3):560-6.
		Gupta VK, Siddiqi NJ, Ojha AK, Sharma B. Hepatoprotective effect of Aloe vera against cartap‐and malathion‐induced toxicity in Wistar rats. Journal of cellular physiology. 2019 Oct;234(10):18329-43.
		Parvez MK, Al‐Dosari MS, Alam P, Rehman M, Alajmi MF, Alqahtani AS. The anti‐hepatitis B virus therapeutic potential of anthraquinones derived from Aloe vera. Phytotherapy Research. 2019 Nov;33(11):2960-70.
		Werawatganon D, Linlawan S, Thanapirom K, Somanawat K, Klaikeaw N, Rerknimitr R, Siriviriyakul P. Aloe vera attenuated liver injury in mice with acetaminophen-induced hepatitis. BMC complementary and alternative medicine. 2014 Dec 1;14(1):229.
		Hegazy SK, El-Bedewy M, Yagi A. Antifibrotic effect of aloe vera in viral infection-induced hepatic periportal fibrosis. World Journal of Gastroenterology: WJG. 2012 May 7;18(17):2026.
		Shivaprasad B, Chandrashekar KR. Plants used in the treatment of jaundice in Dakshina Kannada district. Journal of Economic and Taxonomic Botany. 2003;27(4):864-8.
		Supriya Tiwari. Aloe Vera juice is beneficial in jaundice. [Internet]. Dec 25 2018. Available at: https://english.newstracklive.com/news/aloe-vera-juice-is-beneficial-in-jaundice-sc53-nu-57766-1.html
		Natural remedies and cures. Aloe Vera Leaf herbal remedy for jaundice. https://www.naturalremediesandcures.co.uk/866,remedies,Herbal_Remedies,aloe_vera_leaf_herbal_remedy_for_jaundice_jaundice.html
Andrographis paniculata	Kalmegh	Chua LS. Review on liver inflammation and antiinflammatory activity of Andrographis paniculata for hepatoprotection. Phytotherapy Research. 2014 Nov;28(11):1589-98.
		Handa SS, Sharma A. Hepatoprotective activity of andrographolide against galactosamine & paracetamol intoxication in rats. The Indian journal of medical research. 1990 Aug 1;92:284-92.
		Trivedi NP, Rawal UM, Patel BP. Hepatoprotective effect of andrographolide against hexachlorocyclohexane-induced oxidative injury. Integrative Cancer Therapies. 2007 Sep;6(3):271-80.
		Subramaniam S, Khan HB, Elumalai N, Lakshmi SY. Hepatoprotective effect of ethanolic extract of whole plant of Andrographis paniculata against CCl 4-induced hepatotoxicity in rats. Comparative Clinical Pathology. 2015 Sep 1;24(5):1245-51.
		Rajalakshmi G, Jothi KA, Venkatesan R, Jegatheesan K. Hepatoprotective activity of andrographis paniculata on paracetamol induced liver damage in rats. Journal of Pharmacy Research. 2012 Jun;5(6):2983-6.
		Rao S, Ramakrishna A. Indian Medicinal Plants: Uses and Propagation Aspects. CRC Press; 2020 Oct 26. Page No. 45
		Puri HS. Rasayana: Ayurvedic herbs for longevity and rejuvenation. CRC Press; 2002 Oct 17. Page 163
		Mishra LC, editor. Scientific basis for Ayurvedic therapies. CRC press; 2003 Sep 29. Page 252
		Chen H, Ma YB, Huang XY, Geng CA, Zhao Y, Wang LJ, Guo RH, Liang WJ, Zhang XM, Chen JJ. Synthesis, structure–activity relationships and biological evaluation of dehydroandrographolide and andrographolide derivatives as novel anti-hepatitis B virus agents. Bioorganic & medicinal chemistry letters. 2014 May 15;24(10):2353-9.
Cassia auriculata	Ranawara	Jaydeokar AV, Bandawane DD, Bibave KH, Patil TV. Hepatoprotective potential of Cassia auriculata roots on ethanol and antitubercular drug-induced hepatotoxicity in experimental models. Pharmaceutical biology. 2014 Mar 1;52(3):344-55.
		Nakamura S, Xu F, Ninomiya K, Nakashima S, Oda Y, Morikawa T, Muraoka O, Yoshikawa M, Matsuda H. Chemical structures and hepatoprotective effects of constituents from Cassia auriculata leaves. Chemical and Pharmaceutical Bulletin. 2014 Oct 1;62(10):1026-31.
		Bhakta T, Mukherjee PK, Mukherjee K, Banerjee S, Mandal SC, Maity TK, Pal M, Saha BP. Evaluation of hepatoprotective activity of Cassia fistula leaf extract. Journal of ethnopharmacology. 1999 Sep 1;66(3):277-82.
		Chauhan KN, Patel MB, Valera HR, Patil SD, Surana SJ. Hepatoprotective activity of flowers of Cassia auriculata R. Br. against paracetamol induced liver injury. Journal of Natural Remedies. 2009 Jan 1;9(1):85-90.
		Mali AA, Bandawane DD, Hivrale MG. Anti-inflammatory and analgesic activities of ethyl acetate and petroleum ether fractions of Cassia auriculata Linn. leaves. Oriental Pharmacy and Experimental Medicine. 2013 Sep 1;13(3):191-7.
		Puri HS. Rasayana: Ayurvedic herbs for longevity and rejuvenation. CRC Press; 2002 Oct 17. Page 88
Centella asiatica	Mandukaparni	Uchechi ON, Uchenna IF, Precious OF, Olu EL, Bariburame N. Potential of Centella asiatica leaf extract in the management of paracetamol-induced jaundice in albino rats. World Journal of Advanced Research and Reviews. 2020;6(1):244-54.
		DEB D, Datta BK, DEBBARMA J, DEB S. Ethno-medicinal plants used for herbal medication of jaundice by the indigenous community of Tripura, India. Biodiversitas Journal of Biological Diversity. 2016;17(1).
		Ulbricht CE, Basch EM, editors. Natural standard herb & supplement reference: evidence-based clinical reviews. Mosby; 2005. Page No. 927
		Antony B, Santhakumari G, Merina B, Sheeba V, Mukkadan J. Hepatoprotective effect of Centella asiatica (L) in carbon tetrachloride-induced liver injury in rats. Indian Journal of Pharmaceutical Sciences. 2006;68(6):772.
		Kumar P, Prasad R, Singh KK, Roy BK. Hepatoprotective effect of Centella asiatica against paracetamol induced liver damage in broiler chicken. Indian Journal of Poultry Science. 2009;44(1):101-4.
Diospyros montana	Visha-tinduka, Kaaka-tinduka	Khare CP. Indian medicinal plants: an illustrated dictionary. Springer Science & Business Media; 2008 Apr 22.
Leucas aspera	Dronapushpi	Banu S, Bhaskar B, Balasekar P. Hepatoprotective and antioxidant activity of Leucas aspera against D-galactosamine induced liver damage in rats. Pharmaceutical Biology. 2012 Dec 1;50(12):1592-5.
		Thenmozhi M, Dhanalakshmi M, Devi KM, Sushila K, Thenmozhi S. Evaluation of hepatoprotective activity of Leucas aspera hydroalcoholic leaf extract during exposure to lead acetate in male albino Wistar rats. Asian J Pharm Clin Res. 2013;6(1):78-81.
		Vimalanathan S, Ignacimuthu S, Hudson JB. Medicinal plants of Tamil Nadu (Southern India) are a rich source of antiviral activities. Pharmaceutical Biology. 2009 May 1;47(5):422-9.
		Nirmala KA, Kanchana M. Leucas aspera–A Review of its Biological activity. Systematic Reviews in Pharmacy. 2018;9(1):41-4.
		Saundane AR, Ulla KH, Satyanarayan ND. Antiinflammatory and analgesic activity of various extracts of Leucas aspera Spreng (Labiatae). Indian Journal of Pharmaceutical Sciences. 2000;62(2):144.
Mangifera indica	Mango	Mohan CG, Deepak M, Viswanatha GL, Savinay G, Hanumantharaju V, Rajendra CE, Halemani PD. Anti-oxidant and anti-inflammatory activity of leaf extracts and fractions of Mangifera indica. Asian Pacific journal of tropical medicine. 2013 Apr 13;6(4):311-4.
		Dhananjaya BL, Shivalingaiah S. The anti-inflammatory activity of standard aqueous stem bark extract of Mangifera indica L. as evident in inhibition of Group IA sPLA2. Anais da Academia Brasileira de Ciências. 2016 Mar;88(1):197-209.
		Hossain MS, Ahmed M, Islam A. Hypolipidemic and hepatoprotective effects of different fractions of ethanolic extract of immature leaves of Mangifera indica (Linn.) in alloxan induced diabetic rats. International Journal of Pharmaceutical Sciences and Research. 2010 Nov 1;1(11):132.
		Das J, Ghosh J, Roy A, Sil PC. Mangiferin exerts hepatoprotective activity against D-galactosamine induced acute toxicity and oxidative/nitrosative stress via Nrf2–NFκB pathways. Toxicology and applied pharmacology. 2012 Apr 1;260(1):35-47.
		Gazwi HS, Mahmoud ME. Restorative activity of aqueous extract Mangifera indica leaves against CCl4 induced hepatic damage in rats. Journal of Pharmaceutical and Biomedical Analysis. 2019 Feb 5;164:112-8.
		Gupta A, Chaphalkar SR. Potential immunosuppressive and anti-inflammatory activity of aqueous extract of Mangifera indica. Advanced herbal medicine. 2015;1(4):47-54.
		Wauthoz N, Balde A, Balde ES, Van Damme M, Duez P. Ethnopharmacology of Mangifera indica L. bark and pharmacological studies of its main C-glucosylxanthone, mangiferin. International Journal of Biomedical and Pharmaceutical Sciences. 2007 Aug 15;1(2):112-9.
		Khasim SM, Long C, Thammasiri K, Lutken H. Medicinal Plants: Biodiversity, Sustainable Utilization and Conservation. Springer; 2020. Page No. 12
Phyllanthus virgatus	Moti Bhoi-Amli, Seed Under Leaf, Virgate Leaf-Flower	Sivaperuman C, Velmurugan A, Singh AK, Jaisankar I, editors. Biodiversity and climate change adaptation in tropical islands. Academic Press; 2018 Apr 5. Page No. 65
		Srirama R, Deepak HB, Senthilkumar U, Ravikanth G, Gurumurthy BR, Shivanna MB, Chandrasekaran CV, Agarwal A, Shaanker RU. Hepatoprotective activity of Indian phyllanthus. Pharmaceutical biology. 2012 Aug 1;50(8):948-53.
		Sharma SK, Arogya SM, Bhaskarmurthy DH, Agarwal A, Velusami CC. Hepatoprotective activity of the Phyllanthus species on tert-butyl hydroperoxide (t-BH)-induced cytotoxicity in HepG2 cells. Pharmacognosy magazine. 2011 Jul;7(27):229.
Pongamia pinnata	Karanja	Rameshthangam PA, Ramasamy P. Antiviral activity of bis (2-methylheptyl) phthalate isolated from Pongamia pinnata leaves against White Spot Syndrome Virus of Penaeus monodon Fabricius. Virus research. 2007 Jun 1;126(1-2):38-44.
		Elanchezhiyan M, Rajarajan S, Rajendran P, Subramanian S, Thyagarajan SP. Antiviral properties of the seed extract of an Indian medicinal plant, Pongamia pinnata, Linn., against herpes simplex viruses: in-vitro studies on Vero cells. Journal of medical microbiology. 1993 Apr 1;38(4):262-4.
		Essa MM, Subramanian P. Hepatoprotecive effect of Pongamia pinnata leaves in ammonium chloride induced hyperammonemic rats. Journal of Pharmacology and Toxicology. 2008;3(1):20-6.
		Khare CP. Indian herbal remedies: rational Western therapy, ayurvedic, and other traditional usage, Botany. Springer science & business media; 2004. Page No. 378
Ricinus communis	Eranda	Quattrocchi U. CRC world dictionary of medicinal and poisonous plants: common names, scientific names, eponyms, synonyms, and etymology (5 Volume Set). CRC press; 2012 May 3. Page No. 3229
		Visen PK, Shukla B, Patnaik GK, Tripathi SC, Kulshreshtha DK, Srimal RC, Dhawan BN. Hepatoprotective activity of Ricinus communis leaves. International journal of pharmacognosy. 1992 Jan 1;30(4):241-50.
		Babu PR, Bhuvaneswar C, Sandeep G, Ramaiah CV, Rajendra W. Hepatoprotective role of Ricinus communis leaf extract against d-galactosamine induced acute hepatitis in albino rats. Biomedicine & Pharmacotherapy. 2017 Apr 1;88:658-66.
		Shukla B, Visen PK, Patnaik GK, Kapoor NK, Dhawan BN. Hepatoprotective effect of an active constituent isolated from the leaves of Ricinus communis Linn. Drug Development Research. 1992;26(2):183-93.
		Iqbal J, Zaib S, Farooq U, Khan A, Bibi I, Suleman S. Antioxidant, antimicrobial, and free radical scavenging potential of aerial parts of Periploca aphylla and Ricinus communis. ISRN pharmacology. 2012;2012.
		Ilavarasan R, Mallika M, Venkataraman S. Anti-inflammatory and free radical scavenging activity of Ricinus communis root extract. Journal of ethnopharmacology. 2006 Feb 20;103(3):478-80.
		Valderramas AC, Moura SH, Couto M, Pasetto S, Chierice GO, Guimarães SA, de Paula Zurron AC. Antiinflammatory activity of Ricinus communis derived polymer. Brazilian Journal of Oral Sciences. 2008;7(27):1666-72.
Solanum nigrum	Black Nightshade	Panda H. Handbook on herbal medicines. Asia Pacific Business Press Inc.; 2004. Page No. 75
		Rashid R. Solanine from Solanum Nigrum L: A Natural Remedy for Melanoma Cancer. Educreation Publishing; 2017 Nov 25. Page No. 14
		Elhag RA, El Badwi SM, Bakhiet AO, Galal M. Hepatoprotective activity of Solanum nigrum extracts on chemically induced liver damage in rats. Journal of Veterinary Medicine and Animal Health. 2011 Aug 31;3(4):45-50.
		Lin HM, Tseng HC, Wang CJ, Lin JJ, Lo CW, Chou FP. Hepatoprotective effects of Solanum nigrum Linn extract against CCl4-iduced oxidative damage in rats. Chemico-Biological Interactions. 2008 Feb 15;171(3):283-93.
		Hameed IH, Cotos MR, Hadi MY. A review: Solanum nigrum L. antimicrobial, antioxidant properties, hepatoprotective effects and analysis of bioactive natural compounds. Research Journal of Pharmacy and Technology. 2017;10(11):4063-8.
		Singh DP, Awasthi H, Luqman S, Singh S, Mani D. Hepatoprotective effect of a polyherbal extract containing Andrographis paniculata, Tinospora cordifolia and Solanum nigrum against paracetamol induced hepatotoxicity. Pharmacognosy magazine. 2015 Oct;11(Suppl 3):S375.
		Chester K, Zahiruddin S, Ahmad A, Khan W, Paliwal S, Ahmad S. Bioautography-based identification of antioxidant metabolites of Solanum nigrum L. and exploration its hepatoprotective potential against D-galactosamine-induced hepatic fibrosis in rats. Pharmacognosy Magazine. 2019 Apr 1;15(62):104.
		Javed T, Ashfaq UA, Riaz S, Rehman S, Riazuddin S. In-vitro antiviral activity of Solanum nigrum against Hepatitis C Virus. Virology Journal. 2011 Dec 1;8(1):26.
		Liu FP, Ma X, Li MM, Li Z, Han Q, Li R, Li CW, Chang YC, Zhao CW, Lin YX. Hepatoprotective effects of Solanum nigrum against ethanol-induced injury in primary hepatocytes and mice with analysis of glutathione S-transferase A1. Journal of the Chinese Medical Association. 2016 Feb 1;79(2):65-71.
		Chang JJ, Chung DJ, Lee YJ, Wen BH, Jao HY, Wang CJ. Solanum nigrum polyphenol extracts inhibit hepatic inflammation, oxidative stress, and lipogenesis in high-fat-diet-treated mice. Journal of agricultural and food chemistry. 2017 Oct 25;65(42):9255-65.
Strychnus nuxvomica	Nux vomica	Gopalkrishna SV, Lakshmi Narasu M, Ramachandra SS. Hepatoprotective activity of detoxified seeds of nux-vomica against CCl4 induced hepatic injury in albino rats. Pharmacologyonline. 2010;1:803-15.
		Mitra, S., Kumar, V., Ashok, B., Acharya, R. N., & Ravishankar, B. (2011). A comparative anti-inflammatory activity of raw and processed Kupeelu (Strychnos nux-vomica Linn.) seeds on albino rats. Ancient science of life, 31(2), 73–75.
		Visen, P. K. S., Saraswat, B., Raj, K., Bhaduri, A. P., & Dubey, M. P. (1998). Prevention of galactosamine‐induced hepatic damage by the natural product loganin from the plant strychnos nux‐vomica: studies on isolated hepatocytes and bile flow in rat. Phytotherapy Research: An International Journal Devoted to Pharmacological and Toxicological Evaluation of Natural Product Derivatives, 12(6), 405-…
Thespesia populnea	Gansuriya	Yuvaraj, P., & Subramoniam, A. (2009). Hepatoprotective property of Thespesia populnea against carbon tetrachloride induced liver damage in rats. Journal of Basic and Clinical Physiology and Pharmacology, 20(2), 169-178.
		Ilavarasan R, Vasudevan M, Anbazhagan S, Venkataraman S, Sridhar SK. Hepatoprotective activity of Thespesia populnea bark extracts against carbon tetrachloride-induced liver toxicity in rats. Natural Product Sciences. 2003;9(2):83-6.
		Yuvaraj P, Subramoniam A, Louis T, Madhavachandran V, Antoney M, Narasu ML. Hepatoprotective properties of phenolic acids from Thespesia populnea Soland ex. Correa. Ann Phytomedicine. 2012;1(2):74-87.
		Sunilson JA. Hepatoprotective Activity of Isolated Gossypin, a Novel Bioflavanoid from Thespesia Populnea Linn. KPJ Medical. 2016 Nov;6(1):11.
Vernonia cinerea	Monarakudumbiya	Leelaprakash G, Mohan Dass S, Sivajothi V. Antioxidant and hepatoprotective activities of Vernonia cinerea extract against CCl4 induced hepatotoxicity in albino rats. Int. J. Pharm. Sci. Rev. Res. 2011;10:30-4.
		Nishadh A. EVALUATION OF HEPATOPROTECTIVE ACTIVITY OF VERNONIA CINEREA (L.) LESS AND CUMINUM CYMINUM IN CARBON TETRACHLORIDE INDUCED LIVER DAMAGE IN RATS.
		Gokilaveni C, Nishadh A, Selvi V. Ameliorative role of Vernonia cinerea in carbon tetrachloride induced hepatic dysfunction in rats. Ancient science of life. 2006 Jan;25(3-4):1.
		Yadava RN, Raj M. A new antiviral flavone glycoside from Vernonia cinerea Less. Asian Journal of Chemistry. 2013;25(7):3542-4.

## Sheet: Table S2
Table S2: List of plants with their phytocompounds and druglikeness property
Abbreviations: MF Molecular formula; MW Molecular weight; HBA Hydrogen bond acceptor; HBD Hydrogen bond donor; LogP Partition co-efficient; DLS Druglikeness score
Plant name(s)	Phytocompound	PubChem CID	Canonical smiles	MF	MW (g/mol)	HBA	HBD	LogP	DLS
Achyranthes aspera	(3R,5S)- 1,3,4,5-Tetrahydroxycyclohexane carboxylic acid	1268037	C1[C@H](C([C@H](CC1(C(=O)O)O)O)O)O	C7 H12 O6	192.06	6	5	-2.52	-1.09
Achyranthes aspera	20-hydroxyecdysone	5459840	C[C@]12CC[C@H]3C(=CC(=O)[C@H]4[C@@]3(C[C@@H]([C@@H](C4)O)O)C)[C@@]1(CC[C@@H]2[C@](C)([C@@H](CCC(C)(C)O)O)O)O	C27 H44 O7	480.31	7	6	2.35	1.46
Achyranthes aspera	3,4-Dimethoxythiophenol	136539	COC1=C(C=C(C=C1)S)OC	C8 H10 O2 S	170.04	3	1	2.18	-1.11
Achyranthes aspera	3,5- Dihydroxy-6-Methyl-2,3- Dihydro-4H-Pyran-4-one	50918741	CC1=C(C(=O)[C@H](CO1)O)O	C15 H15 N O3	257.11	3	1	1.93	0.53
Achyranthes aspera	Asarone	636822	C/C=C/C1=CC(=C(C=C1OC)OC)OC	C12 H16 O3	208.11	3	0	3.23	-1.72
Achyranthes aspera	Eugenol	3314	COC1=C(C=CC(=C1)CC=C)O	C10 H12 O2	164.08	2	1	2.61	-0.6
Achyranthes aspera	α-ionone	5282108	CC1=CCCC(C1/C=C/C(=O)C)(C)C	C13 H20 O	192.15	1	0	4.05	-0.77
Achyranthes aspera	Spathulenol	92231	C[C@@]1(CC[C@@H]2[C@@H]1[C@H]3[C@H](C3(C)C)CCC2=C)O	C15 H24 O	220.18	1	1	4.33	-0.88
Achyranthes aspera, Centella asiatica	2-Furaldehyde	7362	C1=COC(=C1)C=O	C5 H4 O2	96.02	2	0	0.87	-1.76
Aerva lanata	10-O-β-D-glucopyranosyloxycanthin-6-one	15109283	C1=CC2=C(C=C1O[C@H]3[C@@H]([C@H]([C@@H]([C@H](O3)CO)O)O)O)C4=C5N2C(=O)C=CC5=NC=C4	C20 H18 N2 O7	398.11	8	4	-0.5	-0.39
Aerva lanata	6-methoxy-β carboline-1-propionic acid	15109284	COC1=CC2=C(C=C1)NC3=C2C=CN=C3CCC(=O)O	C15 H14 N2 O3	270.1	4	2	2.34	0.3
Aerva lanata	10-methoxycanthine-6-one (methylervine)	158928	COC1=CC2=C(C=C1)N3C(=O)C=CC4=NC=CC2=C43	C15 H10 N2 O2	250.07	3	0	2.6	-0.45
Aerva lanata	10-hydroxycanthin-6-one (ervine)	158929	C1=CC2=C(C=C1O)C3=C4N2C(=O)C=CC4=NC=C3	C14 H8 N2 O2	236.06	3	1	2.25	-0.44
Aerva lanata	Isorhamnetin 3-(6''-p-coumarylglucoside)	44258025	COC1=C(C=CC(=C1)C2=C(C(=O)C3=C(C=C(C=C3O2)O)O)O[C@H]4C(C([C@@H]([C@H](O4)COC(=O)/C=C/C5=CC=C(C=C5)O)O)O)O)O	C31H28O14	624.15	14	7	2.46	0.8
Aerva lanata	Isorhamnetin	5281654	COC1=C(C=CC(=C1)C2=C(C(=O)C3=C(C=C(C=C3O2)O)O)O)O	C16H12O7	316.06	7	4	2.46	0.67
Aerva lanata	Tiliroside	5320686	C1=CC(=CC=C1/C=C/C(=O)OC[C@@H]2[C@H]([C@@H]([C@H]([C@@H](O2)OC3=C(OC4=CC(=CC(=C4C3=O)O)O)C5=CC=C(C=C5)O)O)O)O)O	C30H26O13	594.14	13	7	2.49	0.85
Aerva lanata	β-carboline-1 -propionic acid	5375436	C1=CC=C2C(=C1)C3=C(N2)C(=NC=C3)CCC(=O)O	C14H12N2O2	240.09	3	2	2.25	0.35
Aerva lanata	Isorhamnetin 3-(3'',6''-di-p-coumarylglucoside)	44258026	COC1=C(C=CC(=C1)C2=C(C(=O)C3=C(C=C(C=C3O2)O)O)O[C@H]4C(C([C@@H]([C@H](O4)COC(=O)/C=C/C5=CC=C(C=C5)O)O)OC(=O)/C=C/C6=CC=C(C=C6)O)O)O	C40 H34 O16	770.18	16	7	5.06	0.97
Aerva lanata	Kaempferol 3-(3'',6''-di-p-coumarylglucoside)	44258868	C1=CC(=CC=C1/C=C/C(=O)OCC2[C@H](C(C([C@@H](O2)OC3=C(OC4=CC(=CC(=C4C3=O)O)O)C5=CC=C(C=C5)O)O)OC(=O)/C=C/C6=CC=C(C=C6)O)O)O	C39 H32 O15	740.17	15	7	5.09	1.03
Aloe vera	Aloe-Emodin	10207	C1=CC2=C(C(=C1)O)C(=O)C3=C(C2=O)C=C(C=C3O)CO	C15 H10 O5	270.05	5	3	1.91	0.25
Aloe vera	Chrysophanic-Acid	10208	CC1=CC2=C(C(=C1)O)C(=O)C3=C(C2=O)C=CC=C3O	C15 H10 O4	254.06	4	2	2.89	0.1
Aloe vera	Isorabaichromone	10370832	CC1=CC(=C(C2=C1C(=O)C=C(O2)C[C@H](C)O)[C@H]3[C@@H]([C@H]([C@@H]([C@H](O3)CO)O)O)OC(=O)/C=C/C4=CC(=C(C=C4)O)O)OC	C29 H32 O12	572.19	12	6	1.74	1.07
Aloe vera	Hydrocinnamic-Acid	107	C1=CC=C(C=C1)CCC(=O)O	C9 H10 O2	150.07	2	1	1.84	-1.2
Aloe vera	Dehydroabietal	11694869	CC(C)C1=CC2=C(C=C1)[C@]3(CCC[C@@]([C@@H]3CC2)(C)C=O)C	C20 H28 O	284.21	1	0	5.35	0.01
Aloe vera	Homonataloin	11968593	COC1=C(C=CC2=C1C(=O)C3=C(C2[C@H]4[C@@H]([C@H]([C@@H]([C@H](O4)CO)O)O)O)C=C(C=C3O)O)O	C21 H22 O10	434.12	10	7	-0.02	0.46
Aloe vera	Trihydroxymethylanthraquinone	12309204	CC1=CC(=CC2=C1C(=O)C3=C(C2=O)C=C(C=C3O)O)O	C15 H10 O5	270.05	5	3	2.63	-0.7
Aloe vera	Pteroylglutamic-Acid	135444779	C1=CC(=CC=C1C(=O)NC(CCC(=O)O)C(=O)O)NCC2=CN=C3C(=N2)C(=O)NC(=N3)N	C19 H19 N7 O6	441.14	9	7	-0.95	0.97
Aloe vera	2(3H)-Benzothiazolone	13625	C1=CC=C2C(=C1)NC(=O)S2	C7 H5 N O S	151.01	2	1	2.06	-1.07
Aloe vera	Aloeresin-D	14211225	CC1=CC(=C(C2=C1C(=O)C=C(O2)C[C@@H](C)O)[C@H]3[C@@H]([C@H]([C@@H]([C@H](O3)CO)O)O)OC(=O)/C=C/C4=CC=C(C=C4)O)OC	C29 H32 O11	556.19	11	5	2.12	0.91
Aloe vera	Coniferyl-Alcohol	1549095	COC1=C(C=CC(=C1)/C=C/CO)O	C10 H12 O3	180.08	3	2	1.83	-0.58
Aloe vera	7-Hydroxyaloin	158096	C1=CC(=C(C2=C1[C@H](C3=C(C2=O)C(=CC(=C3)CO)O)[C@H]4[C@@H]([C@H]([C@@H]([C@H](O4)CO)O)O)O)O)O	C21 H22 O10	434.12	10	8	-0.69	0.5
Aloe vera	Aloesin	160190	CC1=CC(=C(C2=C1C(=O)C=C(O2)CC(=O)C)[C@H]3[C@@H]([C@H]([C@@H]([C@H](O3)CO)O)O)O)O	C19 H22 O9	394.13	9	5	-1.03	0.45
Aloe vera	Aloenin	162305	CC1=CC(=CC(=C1C2=CC(=CC(=O)O2)OC)O[C@H]3[C@@H]([C@H]([C@@H]([C@H](O3)CO)O)O)O)O	C19 H22 O10	410.12	10	5	-1.36	0.73
Aloe vera	1,8-Dihydroxyanthracene	19786014	C1=CC2=CC3=C(C=C2C(=C1)O)C(=CC=C3)O	C14 H10 O2	210.07	2	2	3.99	-1.27
Aloe vera	Glucomannan	24892726	C([C@@H]1[C@H]([C@@H]([C@@H]([C@@H](O1)O[C@@H]2[C@H](O[C@H]([C@@H]([C@H]2O)O)O[C@@H]3[C@H](O[C@H]([C@H]([C@H]3O)O)OC4[C@H](O[C@H]([C@H]([C@H]4O)O)O)CO)CO)CO)O)O)O)O	C24 H42 O21	666.22	21	14	-10.12	0.22
Aloe vera	Dibutyl-Phthalate	3026	CCCCOC(=O)C1=CC=CC=C1C(=O)OCCCC	C16 H22 O4	278.15	4	0	4.76	-0.07
Aloe vera	Aloe-Emodin-Anthranol	3220	CC1=CC2=C(C(=C1)O)C(=O)C3=C(C2=O)C=C(C=C3O)O	C15 H10 O5	270.05	5	3	2.63	-0.72
Aloe vera	Chrysamminic-Acid	3938245	C1=C(C2=C(C(=C1[N+](=O)[O-])O)C(=O)C3=C(C2=O)C(=CC(=C3O)[N+](=O)[O-])[N+](=O)[O-])[N+](=O)[O-]	C14 H4 N4 O12	419.98	12	2	0.91	-0.5
Aloe vera	Cinnamic-Acid	444539	C1=CC=C(C=C1)/C=C/C(=O)O	C9H8O2	148.05	2	1	2.33	-1.13
Aloe vera	Gamolenic-Acid	5280933	CCCCC/C=C\C/C=C\C/C=C\CCCCC(=O)O	C18H30O2	278.22	2	1	6.31	-0.08
Aloe vera	Feralolide	5317333	CC(=O)C1=C(C=C(C=C1O)O)C[C@@H]2CC3=C(C(=CC(=C3)O)O)C(=O)O2	C18H16O7	344.09	7	4	1.58	0.82
Aloe vera	Aloesone	5317700	CC1=CC(=CC2=C1C(=O)C=C(O2)CC(=O)C)O	C13H12O4	232.07	4	1	1.85	-0.23
Aloe vera	Aloesol	5318230	CC1=CC(=CC2=C1C(=O)C=C(O2)CC(C)O)O	C13H14O4	234.09	4	2	2.06	0.49
Aloe vera	Isocitric-Acid	5318532	C([C@@H]([C@H](C(=O)O)O)C(=O)O)C(=O)O	C6H8O7	192.03	7	4	-2.12	-0.56
Aloe vera	Linoleic-Acid-Ethyl-Ester	5367460	CC/C=C\C/C=C\C/C=C\CCCCCCCC(=O)OCC	C20H34O2	306.26	2	0	7.14	-0.74
Aloe vera	Hydroxyproline	5810	C1[C@H](CN[C@@H]1C(=O)O)O	C5H9NO3	131.06	4	3	1.98	-0.25
Aloe vera	Hexauronic-Acid	610	C1(C(C(OC(C1O)O)C(=O)O)O)O	C6H10O7	194.04	7	5	-3.01	-0.3
Aloe vera	P-Methoxybenzylacetone	61007	CC(=O)CCC1=CC=C(C=C1)OC	C11 H14 O2	178.1	2	0	2.38	-1.41
Aloe vera	4-Hydroxy-3,5-Di-Tert-Butyl-Benzaldehyde	73219	CC(C)(C)C1=CC(=CC(=C1O)C(C)(C)C)C=O	C15 H22 O2	234.16	2	1	4.38	-2.14
Aloe vera	Isoaloeresin-D	76332505	CC1=CC(=C(C2=C1C(=O)C=C(O2)C[C@H](C)O)[C@H]3[C@@H]([C@H]([C@@H]([C@H](O3)CO)O)O)OC(=O)/C=C/C4=CC=C(C=C4)O)OC	C29 H32 O11	556.19	11	5	2.12	0.91
Aloe vera	Monooctylphthalate	79362	CCCCCCCCOC(=O)C1=CC=CC=C1C(=O)O	C16 H22 O4	278.15	4	1	4.87	0.08
Aloe vera	Hydroxymethylanthraquinone	87014	C1=CC=C2C(=C1)C(=O)C3=C(C2=O)C=C(C=C3)CO	C15 H10 O3	238.06	3	1	2.67	-0.25
Aloe vera	M-Protocatechuic-Aldehyde	8768	C1=CC(=C(C=C1C=O)O)O	C7 H6 O3	138.03	3	2	1.01	-0.66
Aloe vera	2-Methyl-2-Phytyl-6-Chromanol	9865117	CC(C)CCCC(C)CCCC(C)CCCC1(CCC2=C(O1)C=CC(=C2)O)C	C26 H44 O2	388.33	2	1	10.24	0.83
Aloe vera	10-Hydroxyaloin-A	14889736	C1=CC2=C(C(=C1)O)C(=O)C3=C([C@]2([C@H]4[C@@H]([C@H]([C@@H]([C@H](O4)CO)O)O)O)O)C=C(C=C3O)CO	C21 H22 O10	434.12	10	8	-1.49	1.05
Aloe vera	10-Hydroxyaloin-B	14889737	C1=CC2=C(C(=C1)O)C(=O)C3=C([C@@]2([C@H]4[C@@H]([C@H]([C@@H]([C@H](O4)CO)O)O)O)O)C=C(C=C3O)CO	C21 H22 O10	434.12	10	8	-1.49	1.05
Aloe vera	Elgonica-Dimer-A	21582596	C1=CC2=C(C(=C1)O)C(=O)C3=C(C2([C@H]4[C@@H]([C@H]([C@@H]([C@H](O4)CO)O)O)O)C5=C(C6=C(C=C5)C(=O)C7=C(C6=O)C(=CC(=C7)CO)O)O)C=C(C=C3O)CO	C36 H30 O14	686.16	14	10	1.03	0.48
Aloe vera	Aloeresin_A	102247458	CC1=CC(=C(C2=C1C(=O)C=C(O2)CC(=O)C)[C@H]3[C@@H]([C@H]([C@@H]([C@H](O3)CO)O)O)OC(=O)/C=C/C4=CC=CC=C4)O[C@H]5[C@@H]([C@H]([C@@H]([C@H](O5)CO)O)O)O	C34 H38 O15	686.22	15	7	-0.92	0.37
Aloe vera	Neoaloesin-A	102445577	CC1=CC(=C(C2=C1C(=O)C=C(O2)CC(=O)C)[C@@H]3[C@@H]([C@H]([C@H](O3)[C@@H](CO)O)O)O)O	C19 H22 O9	394.13	9	5	-1.01	0.37
Aloe vera	7-Hydroxy-8-O-Methyl-Aloin-B	131751175	COC1=C(C=CC2=C1C(=O)C3=C(C2C4C(C(C(C(O4)CO)O)O)O)C=C(C=C3O)CO)O	C22 H24 O10	448.14	10	7	-0.34	0.54
Aloe vera	Diheptyl-Phthalate	19284	CCCCCCCOC(=O)C1=CC=CC=C1C(=O)OCCCCCCC	C22 H34 O4	362.25	4	0	7.63	-0.13
Aloe vera	Casanthranol	2098	C1=CC2=C(C(=C1)O)C(=O)C3=C(C2OC4C(C(C(C(O4)CO)O)O)O)C=C(C=C3O)CO	C21 H22 O10	434.12	10	7	-0.74	0.77
Aloe vera	Sulfoquinovosyl-Diglyceride	56842030	CCCCCCCCCCCCCCCC(=O)OC(CO[C@@H]1[C@@H]([C@H]([C@@H]([C@H](O1)CS(=O)(=O)O)O)O)O)COC(=O)CCC/C=C/C/C=C/C/C=C/C/C=C/C/C=C/CC	C45 H76 O12 S	840.51	12	4	9.16	0.24
Aloe vera	Lysophosphatidyl-Inositol	73755067	CC(=O)OC[C@@H](COP(=O)(O)OC1[C@@H]([C@H](C([C@H]([C@H]1O)O)O)O)O)O	C11 H21 O12 P	376.08	12	7	-5.31	-0.05
Aloe vera	Di-(2-Ethylhexyl)-Phthalate	8343	CCCCC(CC)COC(=O)C1=CC=CC=C1C(=O)OCC(CC)CCCC	C24 H38 O4	390.28	4	0	8.64	0.26
Aloe vera	Dioctyl-Phthalate	8346	CCCCCCCCOC(=O)C1=CC=CC=C1C(=O)OCCCCCCCC	C24 H38 O4	390.28	4	0	8.59	-0.13
Aloe vera, Centella asiatica	Campesterol	173183	C[C@H](CC[C@@H](C)C(C)C)[C@H]1CC[C@@H]2[C@@]1(CC[C@H]3[C@H]2CC=C4[C@@]3(CC[C@@H](C4)O)C)C	C28 H48 O	400.37	1	1	8.9	0.71
Aloe vera, Centella asiatica	Glutamic-Acid	33032	C(CC(=O)O)[C@@H](C(=O)O)N	C5 H9 N O4	147.05	5	4	-2.2	0.69
Aloe vera, Centella asiatica, Strychnus nuxvomica, Vernonia cinerea, Achyranthes aspera, Ricinus communis	Stigmasterol	5280794	CC[C@H](/C=C/[C@@H](C)[C@H]1CC[C@@H]2[C@@]1(CC[C@H]3[C@H]2CC=C4[C@@]3(CC[C@@H](C4)O)C)C)C(C)C	C29H48O	412.37	1	1	8.82	0.73
Aloe vera, Mangifera indica	Isoleucine	6306	CC[C@H](C)[C@@H](C(=O)O)N	C6 H13 N O2	131.09	3	3	-0.45	-1.05
Aloe vera, Mangifera indica	P-Coumaric-Acid	637542	C1=CC(=CC=C1/C=C/C(=O)O)O	C9 H8 O3	164.05	3	2	2.07	-0.74
Aloe vera, Thespesia populnea, Centella asiatica, Vernonia cinerea, Ricinus communis, Diospyros montana	Beta-Sitosterol	222284	CC[C@H](CC[C@@H](C)[C@H]1CC[C@@H]2[C@@]1(CC[C@H]3[C@H]2CC=C4[C@@]3(CC[C@@H](C4)O)C)C)C(C)C	C29 H50 O	414.39	1	1	9.48	0.88
Andrographis paniculata	14-Deoxy-11-Oxoandrographolide	101593061	C[C@@]12CC[C@H]([C@@]([C@H]1CCC(=C)[C@H]2C(=O)CC3=CC(=O)OC3)(C)CO)O	C20 H28 O5	348.19	5	2	2.00	-0.36
Andrographis paniculata	14-Deoxy-11-Dehydroandrographolide	15411809	C[C@@]12CC[C@H]([C@@]([C@H]1CCC(=C)[C@H]2C/C=C\3/C(=COC3=O)O)(C)CO)O	C20 H28 O5	348.19	5	3	2.56	-0.64
Andrographis paniculata	5-Hydroxy-7,8,2'-Trimethoxyflavone	5318506	COC1=CC=CC=C1C2=CC(=O)C3=C(O2)C(=C(C=C3O)OC)OC	C18H16O6	328.09	6	1	3.49	0.61
Andrographis paniculata	5-Hydroxy-7,8,2',3'-Tetramethoxyflavone	5319878	COC1=CC=CC(=C1OC)C2=CC(=O)C3=C(O2)C(=C(C=C3O)OC)OC	C19H18O7	358.11	7	1	3.46	0.5
Andrographis paniculata	Neoandrographolide	9848024	C[C@]1(CCC[C@@]2([C@@H]1CCC(=C)[C@H]2CCC3=CCOC3=O)C)CO[C@H]4[C@@H]([C@H]([C@@H]([C@H](O4)CO)O)O)O	C26 H40 O8	480.27	8	4	2.17	0.17
Andrographis paniculata	Paniculide-A	11821485	CC(=CCCC1=C2[C@H](C[C@@]3([C@H]([C@H]2O)O3)C)OC1=O)C	C15 H20 O4	264.14	4	1	1.85	-0.1
Andrographis paniculata	Paniculide-B	101289823	CC(=CCCC1=C2[C@H](C[C@@]3([C@H]([C@H]2O)O3)CO)OC1=O)C	C15 H20 O5	280.13	5	2	0.72	0.09
Andrographis paniculata	Paniculide-C	101289824	CC(=CCCC1=C2[C@H](C[C@@]3([C@H](C2=O)O3)CO)OC1=O)C	C15 H18 O5	278.12	5	1	0.72	-0.05
Andrographis paniculata	Andrographolide	5318517	CC12CCC(C(C1CCC(=C)C2CC=C3C(COC3=O)O)(C)CO)O	C20 H30 O5	350.21	5	3	2.32	-0.64
Andrographis paniculata	14-Deoxyandrographolide	11624161	CC12CCC(C(C1CCC(=C)C2CCC3=CCOC3=O)(C)CO)O	C20 H30 O4	334.21	4	2	3.22	-0.24
Andrographis paniculata	14-Deoxy 11,12-didehydroandrographolide	5708351	CC12CCC(C(C1CCC(=C)C2C=CC3=CCOC3=O)(C)CO)O	C20 H28 O4	332.2	4	2	3.22	-0.54
Andrographis paniculata	Isoandrographolide	343585	CC12CCC(C(C1CCC(=C)C2CC=C3C(COC3=O)O)(C)CO)O	C20 H30 O5	350.21	5	3	2.32	-0.64
Andrographis paniculata	Andrographiside	44593583	CC12CCC(C(C1CCC(=C)C2CC=C3C(COC3=O)O)(C)COC4C(C(C(C(O4)CO)O)O)O)O	C26 H40 O10	512.26	10	6	0.55	0.08
Andrographis paniculata	Andrograpanin	11666871	CC1(CCCC2(C1CCC(=C)C2CCC3=CCOC3=O)C)CO	C20 H30 O3	318.22	3	1	4.28	-0.3
Andrographis paniculata	14-Deoxy-11-hydroxyandrographolide	91884987	CC12CCC(C(C1CCC(=C)C2C(CC3=CCOC3=O)O)(C)CO)O	C20 H30 O5	350.21	5	3	2.08	-0.48
Andrographis paniculata	Andrographolactone	44206466	CC1=CC2=C(CCC1)C(=C(C(=C2)C)CCC3=CCOC3=O)C	C20 H24 O2	296.18	2	0	5.66	0.53
Andrographis paniculata	19-O-acetyl-14-deoxy-11,12-didehydroandrographolide	46179874	CC(=O)OCC1(C2CCC(=C)C(C2(CCC1O)C)C=CC3=CCOC3=O)C	C22 H30 O5	374.21	5	1	3.8	-0.23
Andrographis paniculata	Altisin	15100719	COC1=C(C(=CC=C1)OC)C2=CC(=O)C3=C(O2)C(=C(C=C3O)OC)OC	C19 H18 O7	358.11	7	1	2.81	0.03
Andrographis paniculata	2'-hydroxy-5,7,8- trimethoxyflavone	21668878	COC1=CC(=C(C2=C1C(=O)C=C(O2)C3=CC=CC=C3O)OC)OC	C18 H16 O6	328.09	6	1	3.9	0.2
Andrographis paniculata	5-hydroxy-7,8,2',3',4'- pentamethoxyflavone	12315479	COC1=C(C(=C(C=C1)C2=CC(=O)C3=C(O2)C(=C(C=C3O)OC)OC)OC)OC	C20 H20 O8	388.12	8	1	3.4	0.36
Andrographis paniculata	Wightin	12444943	COC1=C(C2=C(C(=C1)O)C(=O)C=C(O2)C3=C(C(=CC=C3)O)OC)OC	C18 H16 O7	344.09	7	2	3.08	0.19
Andrographis paniculata	5-hydroxy-7,8-dimethoxyflavanone	13963770	COC1=C(C2=C(C(=O)CC(O2)C3=CC=CC=C3)C(=C1)O)OC	C17 H16 O5	300.1	5	1	3.02	0.48
Andrographis paniculata	5-hydroxy-7,8-dimethoxyflavone	188316	COC1=C(C2=C(C(=C1)O)C(=O)C=C(O2)C3=CC=CC=C3)OC	C17 H14 O5	298.08	5	1	3.74	0.17
Andrographis paniculata	Skullcapflavone I	5320399	COC1=C(C2=C(C(=C1)O)C(=O)C=C(O2)C3=CC=CC=C3O)OC	C17 H14 O6	314.08	6	2	3.71	0.33
Andrographis paniculata	5-hydroxy-7,8,2',5'- tetramethoxyflavone	10948318	COC1=CC(=C(C=C1)OC)C2=CC(=O)C3=C(O2)C(=C(C=C3O)OC)OC	C19 H18 O7	358.11	7	1	3.41	0.11
Andrographis paniculata	5,4'-dihydroxy-7,8,2',3'- tetramethoxyflavone	13963777	COC1=C(C2=C(C(=C1)O)C(=O)C=C(O2)C3=C(C(=C(C=C3)O)OC)OC)OC	C19 H18 O8	374.1	8	2	3.02	0.31
Andrographis paniculata	Skullcapflavone II	124211	COC1=CC=CC(=C1C2=CC(=O)C3=C(C(=C(C(=C3O2)OC)OC)OC)O)O	C19 H18 O8	374.1	8	2	3.37	-0.45
Andrographis paniculata	Andrographidine A	13963762	COC1=C(C2=C(C(=O)CC(O2)C3=CC=CC=C3)C(=C1)OC4C(C(C(C(O4)CO)O)O)O)OC	C23 H26 O10	462.15	10	4	0.91	0.38
Andrographis paniculata	Andrographidine C	5318484	COC1=C(C2=C(C(=C1)OC3C(C(C(C(O3)CO)O)O)O)C(=O)C=C(O2)C4=CC=CC=C4)OC	C23 H24 O10	460.14	1	4	1.67	0.24
Cassia auriculata	Pelargonidin 5-galactoside	44256698	C1=CC(=CC=C1C2=C(C=C3C(=CC(=CC3=[O+]2)O)O[C@H]4C([C@H]([C@H](C(O4)CO)O)O)O)O)O	C21H21O10	433.11	10	7	-0.26	0.32
Centella asiatica	2,3-Dihydrobenzofuran	10329	C1COC2=CC=CC=C21	C8 H8 O	120.1	1	0	2.1	-1.55
Centella asiatica	Epiglobulol	11858788	C[C@@H]1CC[C@@H]2[C@@H]1[C@H]3[C@H](C3(C)C)CC[C@]2(C)O	C15 H26 O	222.2	1	1	4.35	-1.06
Centella asiatica	Beta-Sesquiphellandrene	12315492	C[C@@H](CCC=C(C)C)[C@H]1CCC(=C)C=C1	C15 H24	204.19	0	0	5.19	-0.58
Centella asiatica	7-Glucosylkaempferol	129856029	C1=CC(=CC=C1C2=C(C(=O)C3=C(O2)C=C(C(=C3O)OC4[C@@H]([C@H]([C@@H]([C@H](O4)CO)O)O)O)O)O)O	C21 H20 O12	464.1	12	8	-0.76	0.69
Centella asiatica	Borneol-Acetate	14019266	CC(=O)O[C@H]1[C@]2(CC[C@H](C2)C1(C)C)C	C12 H20 O2	196.15	2	0	3.18	-0.86
Centella asiatica	Beta-Pinene	14896	CC1(C2CCC(=C)C1C2)C	C10 H16	136.13	0	0	3.72	-1.41
Centella asiatica	Caryophyllene-Oxide	1742210	C[C@@]12CC[C@@H]3[C@H](CC3(C)C)C(=C)CC[C@H]1O2	C15 H24 O	220.18	1	0	4.53	-1.43
Centella asiatica	P-Vinyl-Guaiacol	332	COC1=C(C=CC(=C1)C=C)O	C9 H10 O2	150.07	2	1	2.43	-0.96
Centella asiatica	Delta-Cadinene	441005	CC1=C[C@H]2[C@@H](CCC(=C2CC1)C)C(C)C	C15 H24	204.19	0	0	5.44	-1.07
Centella asiatica	Madecassic-Acid	51531966	C[C@@H]1CC[C@@]2(CC[C@@]3(C(=CC[C@H]4[C@]3(C[C@H]([C@H]5[C@@]4(C[C@H]([C@@H]([C@@]5(C)CO)O)O)C)O)C)[C@@H]2[C@H]1C)C)C(=O)O	C30H48O6	504.35	6	5	4.63	0.69
Centella asiatica	3-Glucosylquercetin	5280804	C1=CC(=C(C=C1C2=C(C(=O)C3=C(C=C(C=C3O2)O)O)O[C@H]4[C@@H]([C@H]([C@@H]([C@H](O4)CO)O)O)O)O)O	C21H20O12	464.1	12	8	-0.64	0.89
Centella asiatica	3-Glucosylkaempferol	5282102	C1=CC(=CC=C1C2=C(C(=O)C3=C(C=C(C=C3O2)O)O)O[C@H]4[C@@H]([C@H]([C@@H]([C@H](O4)CO)O)O)O)O	C21H20O11	488.1	11	7	-0.26	0.8
Centella asiatica	Nerolidol	5284507	CC(=CCC/C(=C/CCC(C)(C=C)O)/C)C	C15H26O	222.2	1	1	5.24	-1.03
Centella asiatica	Bicycloelemene	56842786	CC(=C)[C@H]1[C@H]2[C@H](C2(C)C)CC[C@@]1(C)C=C	C15H24	204.19	0	0	5.41	-1.13
Centella asiatica	Geraniol	637566	CC(=CCC/C(=C/CO)/C)C	C10 H18 O	154.14	1	1	3.33	-1.11
Centella asiatica	Nerol	643820	CC(=CCC/C(=C\CO)/C)C	C10 H18 O	154.14	1	1	3.33	-1.11
Centella asiatica	Linalool	6549	CC(=CCCC(C)(C=C)O)C	C10 H18 O	154.14	1	1	3.25	-0.99
Centella asiatica	Beta-Elemene	6918391	CC(=C)[C@@H]1CC[C@@]([C@@H](C1)C(=C)C)(C)C=C	C15 H24	204.19	0	0	5.39	-1.15
Centella asiatica	Isobrahmic-Acid	73412	C[C@@H]1CC[C@@]2(CC[C@@]3(C(=CC[C@H]4[C@]3(C[C@H]([C@@H]5[C@@]4(C[C@H]([C@@H]([C@@]5(C)CO)O)O)C)O)C)[C@@H]2[C@H]1C)C)C(=O)O	C30 H48 O6	504.35	6	5	4.63	0.69
Centella asiatica	Gamma-Terpinene	7461	CC1=CCC(=CC1)C(C)C	C10 H16	136.13	0	0	4.57	-1.61
Centella asiatica	Meso-Inositol	892	C1(C(C(C(C(C1O)O)O)O)O)O	C6 H12 O6	180.06	6	6	-3.61	-0.89
Centella asiatica	Germacrene-D	91723653	C/C/1=C/CCC(=C)/C=C\[C@@H](CC1)C(C)C	C15 H24	204.19	0	0	4.81	-1.71
Centella asiatica	Germacrene	9548705	C/C/1=C\CC/C(=C/C[C@@H](CC1)C(=C)C)/C	C15 H24	204.19	0	0	5.52	-1.81
Centella asiatica	Widdrene	97829	CC1=CCC2(CCCC(C23C1C3)(C)C)C	C15 H24	204.19	0	0	5.35	-1.03
Centella asiatica	Isothankunic-Acid	12302703	CC1CCC2(CCC3(C(=CCC4C3(CC(C5(C4(CCC(C5(C)CO)O)C)O)O)C)C2C1C)C)C(=O)O	C30 H48 O6	504.35	6	5	4.78	0.91
Centella asiatica	Madasiatic-Acid	23132225	CC1CCC2(CCC3(C(=CCC4C3(CC(C5C4(CC(C(C5(C)C)O)O)C)O)C)C2C1C)C)C(=O)O	C30 H48 O5	488.35	5	4	5.75	0.53
Centella asiatica	Brahmic-Acid	258809	CC1CCC2(CCC3(C(=CCC4C3(CC(C5C4(CC(C(C5(C)CO)O)O)C)O)C)C2C1C)C)C(=O)O	C30 H48 O6	504.35	6	5	4.63	0.69
Centella asiatica, Leucas aspera	Beta-Caryophyllene	5281515	C/C/1=C\CCC(=C)[C@H]2CC([C@@H]2CC1)(C)C	C15 H24	204.19	0	0	5.4	-1.73
Centella asiatica, Leucas aspera	Alpha-Humulene	5281520	C/C/1=C\CC(/C=C/C/C(=C/CC1)/C)(C)C	C15 H24	204.19	0	0	5.47	-1.38
Centella asiatica, Mangifera indica	Limonene	22311	CC1=CCC(CC1)C(=C)C	C10 H16	136.13	0	0	3.83	-1.51
Centella asiatica, Pongamia pinnata, Diospyros montana, Centella asiatica	Betulic-Acid	64971	CC(=C)[C@@H]1CC[C@]2([C@H]1[C@H]3CC[C@@H]4[C@]5(CC[C@@H](C([C@@H]5CC[C@]4([C@@]3(CC2)C)C)(C)C)O)C)C(=O)O	C30 H48 O3	456.36	3	2	7.65	0.31
Diospyros montana	Allobetulin	11080733	C[C@@]12CC[C@@]34CCC([C@@H]([C@@H]3[C@H]1CC[C@H]5[C@]2(CC[C@@H]6[C@@]5(CC[C@@H](C6(C)C)O)C)C)OC4)(C)C	C30 H50 O2	442.38	2	1	7.91	-0.47
Diospyros montana	Fucostanol	15559396	CC[C@H](CC[C@@H](C)[C@H]1CC[C@@H]2[C@@]1(CC[C@H]3[C@H]2CCC4[C@@]3(CC[C@@H](C4)O)C)C)C(C)C	C29 H52 O	416.4	1	1	9.52	0.35
Diospyros montana	Mamegakinone	167673	CC1=CC2=C(C(=C1)O)C(=O)C(=CC2=O)C3=CC(=O)C4=C(C3=O)C(=CC(=C4)C)O	C22 H14 O6	374.08	6	2	3.52	-0.48
Diospyros montana	Ramentaceone	26905	CC1=CC2=C(C(=O)C=CC2=O)C(=C1)O	C11 H8 O3	188.05	3	1	1.92	-1.02
Diospyros montana	Euclein	308140	CC1=CC2=C(C(=C1)O)C(=O)C=C(C2=O)C3=C(C4=C(C=C3C)C(=O)C=CC4=O)O	C22 H14 O6	374.08	6	2	3.41	-0.66
Diospyros montana	Yerrinquinone	618938	COC1=CC(=O)C2=C(C(=CC(=C2C1=O)O)C(=O)OC)OC	C14 H12 O7	292.06	7	1	1.27	-0.19
Diospyros montana	Biramentaceone	633060	CC1=CC2=C(C(=C1)O)C(=O)C=C(C2=O)C3=CC(=O)C4=C(C3=O)C=C(C=C4O)C	C22 H14 O6	374.08	6	2	3.52	-0.44
Diospyros montana	Ursolic Acid	64945	C[C@@H]1CC[C@@]2(CC[C@@]3(C(=CC[C@H]4[C@]3(CC[C@@H]5[C@@]4(CC[C@@H](C5(C)C)O)C)C)[C@@H]2[C@H]1C)C)C(=O)O	C30 H48 O3	456.36	3	2	7.84	0.65
Diospyros montana	Betulin	72326	CC(=C)[C@@H]1CC[C@]2([C@H]1[C@H]3CC[C@@H]4[C@]5(CC[C@@H](C([C@@H]5CC[C@]4([C@@]3(CC2)C)C)(C)C)O)C)CO	C30 H50 O2	442.38	2	2	7.9	-0.09
Diospyros montana	Isodiospyrin	99298	CC1=CC2=C(C(=O)C=CC2=O)C(=C1C3=C4C(=O)C=CC(=O)C4=C(C=C3C)O)O	C15 H15 N O3	257.11	3	1	1.93	0.53
Diospyros montana	Oxyallobetulin	304256	CC1(CCC23CCC4(C(C2C1OC3=O)CCC5C4(CCC6C5(CCC(C6(C)C)O)C)C)C)C	C30 H48 O3	456.36	3	1	6.94	-0.32
Diospyros montana	Astrantiagenin C	10494	C[C@]12CC[C@@H](C([C@@H]1CC[C@@]3([C@@H]2CC=C4[C@]3(CC[C@@]5([C@H]4CC(CC5)(C)C)C(=O)O)C)C)(C)C)O	C30 H48 O3	456.36	3	2	7.8	0.37
Diospyros montana	Ursolic Acid	64945	C[C@@H]1CC[C@@]2(CC[C@@]3(C(=CC[C@H]4[C@]3(CC[C@@H]5[C@@]4(CC[C@@H](C5(C)C)O)C)C)[C@@H]2[C@H]1C)C)C(=O)O	C30 H48 O3	456.36	3	2	7.84	0.65
Diospyros montana, Aloe vera, Pongamia pinnata, Vernonia cinerea, Ricinus communis	Lupeol	259846	CC(=C)[C@@H]1CC[C@]2([C@H]1[C@H]3CC[C@@H]4[C@]5(CC[C@@H](C([C@@H]5CC[C@]4([C@@]3(CC2)C)C)(C)C)O)C)C	C30 H50 O	426.39	1	1	9.02	-0.16
Diospyros montana, Strychnus nuxvomica, Ricinus communis	Alpha-Amyrin	73170	C[C@@H]1CC[C@@]2(CC[C@@]3(C(=CC[C@H]4[C@]3(CC[C@@H]5[C@@]4(CC[C@@H](C5(C)C)O)C)C)[C@@H]2[C@H]1C)C)C	C30 H50 O	426.39	1	1	9.21	0.09
Leucas aspera	Acacetin	5280442	COC1=CC=C(C=C1)C2=CC(=O)C3=C(C=C(C=C3O2)O)O	C16 H12 O5	284.07	5	2	3.41	0.52
Leucas aspera	Apigenin	5280443	C1=CC(=CC=C1C2=CC(=O)C3=C(C=C(C=C3O2)O)O)O	C15 H10 O5	270.05	5	3	3.06	0.77
Leucas aspera	Asperphenamate	173952	C1=CC=C(C=C1)C[C@@H](COC(=O)[C@H](CC2=CC=CC=C2)NC(=O)C3=CC=CC=C3)NC(=O)C4=CC=CC=C4	C32 H30 N2 O4	506.22	4	2	5.45	0.1
Leucas aspera	(-)-Chicanine	53360432	C[C@H]1[C@H]([C@H](O[C@@H]1C2=CC3=C(C=C2)OCO3)C4=CC(=C(C=C4)O)OC)C	C20 H22 O5	342.15	5	1	5.03	-0.29
Leucas aspera	Chrysoeriol	5280666	COC1=C(C=CC(=C1)C2=CC(=O)C3=C(C=C(C=C3O2)O)O)O	C16 H12 O6	300.06	6	3	3.03	0.65
Leucas aspera	Erythro-2-(4-allyl-2,6-dimethoxyphenoxy)-1-(4-hydroxy-3-methoxyphenyl)propan-1-ol	23872112	CC(C(C1=CC(=C(C=C1)O)OC)O)OC2=C(C=C(C=C2OC)CC=C)OC	C21 H26 O6	374.17	6	2	3.85	0.9
Leucas aspera	Leucasperol B	101403654	C[C@@H]1CC(=O)[C@@H]2[C@@]([C@@]13CC[C@]4(O3)CCO[C@@H]4O)(CC[C@@H](C2(C)C)O)C	C20 H32 O5	352.22	5	2	2.59	-0.05
Leucas aspera	Leucasperone B	11844108	C[C@H]1C[C@H](C2=C([C@@]1(C)C(CC(C)(C=C)O)O)CCC(=O)[C@]2(C)COC(=O)C)OC(=O)C	C24 H36 O7	436.25	7	2	2.76	0.64
Leucas aspera	Leucasperones A	11843975	C[C@H]1C[C@H](C2=C([C@@]1(C)C(CC(C)(C=C)O)OC(=O)C)CCC(=O)[C@]2(C)COC(=O)C)OC(=O)C	C26 H38 O8	478.26	8	1	3.21	0.55
Leucas aspera	Leucasperoside A	11844112	C[C@@]1(CC[C@H]2C(=C1)C(=O)C[C@@H]3[C@@]2(CC[C@@H](C3(C)C)O[C@H]4[C@@H]([C@H]([C@@H]([C@H](O4)CO)O)O)O[C@H]5[C@@H]([C@H]([C@@H]([C@H](O5)CO[C@H]6[C@@H]([C@H]([C@@H]([C@H](O6)CO)O)O)O)O)O)O)C)C=C	C38 H60 O17	788.38	17	10	-2.96	-0.15
Leucas aspera	Leucasperoside B	11844236	C[C@@]1(CC[C@H]2C(=C1)C(=O)C[C@@H]3[C@@]2(CC[C@@H](C3(C)C)O[C@H]4[C@@H]([C@H]([C@@H]([C@H](O4)CO)O)O)O[C@H]5[C@@H]([C@H]([C@@H]([C@H](O5)CO)O)O)O)C)C=C	C32 H50 O12	626.34	12	7	-0.67	-0.07
Leucas aspera	Linifolioside	15953779	CC1C(C(C(C(O1)OC2C(C(C(OC2OC3CCC4(C5CCC(C=C5C(=O)CC4C3(C)C)(C)C=C)C)CO)O)O)O)O)O	C32 H50 O11	610.34	11	6	0.4	0
Leucas aspera	Macelignan	10404245	C[C@H](CC1=CC2=C(C=C1)OCO2)[C@@H](C)CC3=CC(=C(C=C3)O)OC	C20 H24 O4	328.17	4	1	5.79	-0.06
Leucas aspera	Maslinic acid	73659	C[C@@]12CC[C@@H]3[C@@]([C@H]1CC=C4[C@]2(CC[C@@]5([C@H]4CC(CC5)(C)C)C(=O)O)C)(C[C@H]([C@@H](C3(C)C)O)O)C	C30 H48 O4	472.36	4	3	6.76	0.52
Leucas aspera	Meso-dihydroguaiaretic acid	476856	C[C@H](CC1=CC(=C(C=C1)O)OC)[C@@H](C)CC2=CC(=C(C=C2)O)OC	C20 H26 O4	330.18	4	2	5.35	-0.04
Leucas aspera	Myristargenol B	5703 (greenmolBD)	CC(CC1=CC(=C(C=C1)O)OC)C(C)C(C2=CC(=C(C=C2)O)OC)O	C20 H26 O5	346.18	5	3	4.27	0.89
Leucas aspera	Nectandrin B	156517	C[C@@H]1[C@@H]([C@H](O[C@H]1C2=CC(=C(C=C2)O)OC)C3=CC(=C(C=C3)O)OC)C	C20 H24 O5	344.16	5	2	4.59	-0.27
Leucas aspera, Achyranthes aspera, Ricinus communis, Aloe vera, Solanum nigrum, Thespesia populnea, Centella asiatica, Mangifera indica, Strychnus nuxvomica, Vernonia cinerea	Linoleic acid	5280450	CCCCC/C=C\C/C=C\CCCCCCCC(=O)O	C18H32O2	280.24	2	1	6.73	-0.08
Mangifera indica	Mangiferonic-Acid	14034474	C[C@H](CC/C=C(\C)/C(=O)O)[C@H]1CC[C@@]2([C@@]1(CC[C@]34[C@H]2CC[C@@H]5[C@]3(C4)CCC(=O)C5(C)C)C)C	C30 H46 O3	454.34	3	1	7.75	0.34
Mangifera indica	Gibberellin A29	14605548	C[C@@]12C[C@H](C[C@@]3([C@@H]1[C@@H]([C@]45[C@H]3CC[C@](C4)(C(=C)C5)O)C(=O)O)OC2=O)O	C19 H24 O6	348.16	6	3	0.2	-0.39
Mangifera indica	Dihydrozeatin	32021	CC(CCNC1=NC=NC2=C1NC=N2)CO	C10 H15 N5 O	221.13	4	3	0.56	0.05
Mangifera indica	Violaxanthin	448438	C/C(=C\C=C\C=C(\C=C\C=C(\C=C\[C@@]12O[C@@]1(C[C@H](CC2(C)C)O)C)/C)/C)/C=C/C=C(/C=C/[C@@]34O[C@@]3(C[C@H](CC4(C)C)O)C)\C	C40H56O4	600.42	4	2	10.36	-1.49
Mangifera indica	Trans-Zeatin	449093	C/C(=C\CNC1=NC=NC2=C1NC=N2)/CO	C10H13N5O	219.11	4	3	0.58	-0.96
Mangifera indica	Mangiferolic-Acid	45270099	C[C@H](CC/C=C(\C)/C(=O)O)[C@H]1CC[C@@]2([C@@]1(CC[C@]34[C@H]2CC[C@@H]5[C@]3(C4)CC[C@@H](C5(C)C)O)C)C	C30H48O3	456.36	3	2	8.05	0.04
Mangifera indica	23-Hydroxy-mangiferonic acid	45271778	C[C@H](CC(/C=C(\C)/C(=O)O)O)[C@H]1CC[C@@]2([C@@]1(CC[C@]34[C@H]2CC[C@@H]5[C@]3(C4)CCC(=O)C5(C)C)C)C	C30H46O4	470.34	4	2	6.75	0.39
Mangifera indica	Gibberellin A1	5280379	C[C@@]12[C@H](CC[C@@]3([C@@H]1[C@@H]([C@]45[C@H]3CC[C@](C4)(C(=C)C5)O)C(=O)O)OC2=O)O	C19H24O6	348.16	6	3	0.33	-0.35
Mangifera indica	Gibberellin A20	5280481	C[C@@]12CCC[C@@]3([C@@H]1[C@@H]([C@]45[C@H]3CC[C@](C4)(C(=C)C5)O)C(=O)O)OC2=O	C19H24O5	332.16	5	2	1.36	-0.52
Mangifera indica	Linolenic-Acid	5280934	CC/C=C\C/C=C\C/C=C\CCCCCCCC(=O)O	C18H30O2	278.22	2	1	6.31	0.36
Mangifera indica	5,6-epoxy-beta-Carotene / beta-Carotene 5,6-epoxide	5281231	CC1=C(C(CCC1)(C)C)/C=C/C(=C/C=C/C(=C/C=C/C=C(\C)/C=C/C=C(\C)/C=C/C23C(CCCC2(O3)C)(C)C)/C)/C	C40H56O	552.43	1	0	13.05	-0.12
Mangifera indica	Mangiferin	5281647	C1=C2C(=CC(=C1O)O)OC3=C(C2=O)C(=C(C(=C3)O)[C@H]4[C@@H]([C@H]([C@@H]([C@H](O4)CO)O)O)O)O	C19H18O11	422.08	11	8	-0.39	0.33
Mangifera indica	5-(Heptadec-12-enyl)resorcinol	5281859	CCCC/C=C\CCCCCCCCCCCC1=CC(=CC(=C1)O)O	C23H3O2	346.29	2	2	9	-0.95
Mangifera indica	Gibberellin A19	5460209	C[C@]1(CCC[C@@]2([C@@H]1[C@@H]([C@]34[C@H]2CC[C@](C3)(C(=C)C4)O)C(=O)O)C=O)C(=O)O	C20H26O6	326.17	6	3	1.48	-0.39
Mangifera indica	Leucine	6106	CC(C)C[C@@H](C(=O)O)N	C6 H13 N O2	131.09	3	3	-0.47	-0.61
Mangifera indica	Gamma-Eudesmol	6432005	CC1=C2C[C@@H](CC[C@]2(CCC1)C)C(C)(C)O	C15 H26 O	222.2	1	1	4.19	-0.07
Mangifera indica	Mangiferic-Acid	6439027	CC/C=C/CCCC/C=C/CCCCCCCC(=O)O	C18 H32 O2	280.24	2	1	6.68	0.36
Mangifera indica	Gibberellin A3	6466	C[C@@]12[C@H](C=C[C@@]3([C@@H]1[C@@H]([C@]45[C@H]3CC[C@](C4)(C(=C)C5)O)C(=O)O)OC2=O)O	C19 H22 O6	346.14	6	3	-0.11	-0.51
Mangifera indica	Rubrofusarin	72537	CC1=CC(=O)C2=C(C3=C(C=C(C=C3C=C2O1)OC)O)O	C15 H12 O5	272.07	5	2	2.89	-0.68
Mangifera indica	Cyanidin 3-arabinoside	74079809	C1C(C(C(C(O1)OC2=CC3=C(C=C(C=C3[O+]=C2C4=CC(=C(C=C4)O)O)O)O)O)O)O	C20 H19 O10	419.1	10	7	-0.07	0.38
Mangifera indica	5-Pentadecylresorcinol	76617	CCCCCCCCCCCCCCCC1=CC(=CC(=C1)O)O	C21 H36 O2	320.27	2	2	8.5	-1.07
Mangifera indica	N6-(delta2-Isopentenyl)adenine	92180	CC(=CCNC1=NC=NC2=C1NC=N2)C	C10 H13 N5	203.12	3	2	1.55	-0.88
Mangifera indica	Butin / 7,3',4'-Trihydroxyflavanone	92775	C1[C@H](OC2=C(C1=O)C=CC(=C2)O)C3=CC(=C(C=C3)O)O	C15 H12 O5	272.07	5	3	2.3	1.2
Mangifera indica	Isomangiferolic-Acid	14034465	CC(CC/C=C(\C)/C(=O)O)C1CCC2(C1(CCC34C2CCC5C3(C4)CCC(C5(C)C)O)C)C	C30 H48 O3	456.36	3	2	8.05	0.04
Mangifera indica	Myrtillin	165558	C1=C(C=C(C(=C1O)O)O)C2=[O+]C3=CC(=CC(=C3C=C2O[C@H]4[C@@H]([C@H]([C@@H]([C@H](O4)CO)O)O)O)O)O.[Cl-]	C21 H21 O12.Cl	500.07	12	9	-0.76	0.29
Mangifera indica	Petunidin 3-glucoside	176449	COC1=CC(=CC(=C1O)O)C2=[O+]C3=CC(=CC(=C3C=C2O[C@H]4[C@@H]([C@H]([C@@H]([C@H](O4)CO)O)O)O)O)O.[Cl-]	C22 H23 O12.Cl	514.09	12	8	-0.41	0.42
Mangifera indica	Peonidin galactoside	91810512	COC1=C(C=CC(=C1)C2=[O+]C3=CC(=CC(=C3C=C2O[C@H]4[C@@H]([C@H]([C@H]([C@H](O4)CO)O)O)O)O)O)O.[Cl-]	C22 H23 O11.Cl	498.09	11	7	-0.04	0.08
Phyllanthus virgatus	Kaempferol 8-C-sulfate	10500456	C1=CC(=CC=C1C2=C(C(=O)C3=C(O2)C(=C(C=C3O)O)S(=O)(=O)O)O)O	C15 H10 O9 S	366	9	5	0.41	0.27
Phyllanthus virgatus	Virgatyne	10807051	C1OC2=C(O1)C=C(C=C2)CC(CO)(C#CC3=CC4=C(C=C3)OCO4)O	C19 H16 O6	340.09	6	2	3.05	-1.08
Phyllanthus virgatus	Lirioresinol B	11604108	COC1=CC(=CC(=C1O)OC)[C@H]2[C@@H]3CO[C@H]([C@@H]3CO2)C4=CC(=C(C(=C4)OC)O)OC	C22 H26 O8	418.16	8	2	3.14	-0.63
Phyllanthus virgatus	3,5,7-Trihydroxyflavone 3-glucoside-8-sulfate	44258728	C1=CC=C(C=C1)C2=C(C(=O)C3=C(O2)C(=C(C=C3O)O)S(=O)(=O)O)O[C@H]4C([C@H]([C@@H](C(O4)CO)O)O)O	C21H20O13S	512.06	13	7	-2.08	0.22
Phyllanthus virgatus	Hinokinin	442879	C1[C@@H]([C@H](C(=O)O1)CC2=CC3=C(C=C2)OCO3)CC4=CC5=C(C=C4)OCO5	C20H18O6	354.11	6	0	3.88	-0.59
Pongamia pinnata	Praecansone B	10090306	CC1(C=CC2=C(C(=C(C=C2O1)OC)C(=O)/C=C(/C3=CC=CC=C3)\O)OC)C	C22H22O5	366.15	5	1	4.61	-0.23
Pongamia pinnata	Stigmasterol-3-O-Beta-D-Glucopyranoside	101689889	CC[C@H](/C=C/[C@@H](C)[C@H]1CC[C@@H]2[C@@]1(CC[C@H]3[C@H]2CC=C4[C@@]3(CC[C@@H](C4)O[C@@H]5[C@@H]([C@H]([C@@H]([C@H](O5)CO)O)O)O)C)C)C(C)C	C35 H58 O6	574.42	6	4	6.47	0.32
Pongamia pinnata	7-Methoxypraecansone B	10452362	CC1(C=CC2=C(C(=C(C=C2O1)OC)C(=O)/C=C(/C3=CC=CC=C3)\OC)OC)C	C23 H24 O5	380.16	5	0	4.96	-0.47
Pongamia pinnata	Ovalichromene B	10981007	CC1(C=CC2=C(O1)C=CC3=C2OC(CC3=O)C4=CC5=C(C=C4)OCO5)C	C21 H18 O5	350.12	5	0	4.42	0.07
Pongamia pinnata	Pongamone A	11588678	CC(=CCOC1=C(C2=C(C=C1)C(=O)C(=CO2)C3=CC=C(C=C3)OC)OC)C	C22 H22 O5	366.15	5	0	5.32	0.47
Pongamia pinnata	Pongacoumestan	12135223	COC1=C(C=CC2=C1OC(=O)C3=C2OC4=C3C=CC(=C4)O)O	C16 H10 O6	298.05	6	2	2.89	-0.5
Pongamia pinnata	Pongapinone B	127022	CC(=CCC1=C2C(=C(C=C1OC)OC)C(=O)C[C@H](O2)C3=CC4=C(C=C3)OCO4)C	C23 H24 O6	396.16	6	0	5.13	1.11
Pongamia pinnata	Isopongaglabol	12778491	C1=CC=C(C=C1)C2=CC(=O)C3=C(O2)C4=C(C=C3O)OC=C4	C17 H10 O4	278.06	4	1	4.07	-0.17
Pongamia pinnata	Pongachromene	14033985	CC1(C=CC2=C(O1)C=CC3=C2OC(=C(C3=O)OC)C4=CC5=C(C=C4)OCO5)C	C22 H18 O6	378.11	6	0	4.96	-0.43
Pongamia pinnata	Ponganone III	15160702	CC1(C=CC2=C(O1)C=CC3=C2O[C@@H](CC3=O)C4=CC(=C(C=C4)OC)OC)C	C22 H22 O5	366.15	5	0	4.33	0.34
Pongamia pinnata	Pongachin	155236	CC1(C=CC2=C3C(=C(C=C2O1)OC)C(=O)C[C@H](O3)C4=CC=CC=C4)C	C21 H20 O4	336.14	4	0	4.24	0.21
Pongamia pinnata	Candidone	157102	CC(=CCC1=C2C(=C(C=C1OC)OC)C(=O)C[C@H](O2)C3=CC=CC=C3)C	C22 H24 O4	352.17	4	0	4.98	0.9
Pongamia pinnata	3'-Methoxypongapin	15838767	COC1=CC(=CC2=C1OCO2)C3=C(C(=O)C4=C(O3)C5=C(C=C4)OC=C5)OC	C20 H14 O7	366.07	7	0	4.35	-0.78
Pongamia pinnata	Pongapin	3083586	COC1=C(OC2=C(C1=O)C=CC3=C2C=CO3)C4=CC5=C(C=C4)OCO5	C19 H12 O6	336.06	6	0	4.38	-0.54
Pongamia pinnata	Pinnatin	5320607	COC1=C2C=COC2=CC3=C1C(=O)C=C(O3)C4=CC=CC=C4	C18H12O4	292.07	4	0	4.42	0.24
Pongamia pinnata	Pongapinone A	6438794	CC1(C=CC2=C(C(=C(C=C2O1)OC)C(=O)/C=C(/C3=CC4=C(C=C3)OCO4)\O)OC)C	C23 H22 O7	410.14	7	1	4.76	-0.04
Pongamia pinnata	Lupenone	92158	CC(=C)[C@@H]1CC[C@]2([C@H]1[C@H]3CC[C@@H]4[C@]5(CCC(=O)C([C@@H]5CC[C@]4([C@@]3(CC2)C)C)(C)C)C)C	C30 H48 O	424.37	1	0	8.72	0.37
Ricinus communis	Corilagin	73568	C1[C@@H]2[C@H]([C@@H]([C@H]([C@@H](O2)OC(=O)C3=CC(=C(C(=C3)O)O)O)O)OC(=O)C4=CC(=C(C(=C4C5=C(C(=C(C=C5C(=O)O1)O)O)O)O)O)O)O	C27 H22 O18	634.08	18	11	-2.2	0.83
Ricinus communis	Ellagic acid	5281855	C1=C2C3=C(C(=C1O)O)OC(=O)C4=CC(=C(C(=C43)OC2=O)O)O	C14 H6 O8	302.01	8	4	1.02	-0.98
Ricinus communis	Ent-Copalyldiphosphate	5280897	C/C(=C\COP(=O)(O)OP(=O)(O)O)/CC[C@@H]1C(=C)CC[C@H]2[C@]1(CCCC2(C)C)C	C20 H36 O7 P2	450.19	7	3	3.14	-0.2
Ricinus communis	Gentisic acid	3469	C1=CC(=C(C=C1O)C(=O)O)O	C7 H6 O4	154.03	4	3	0.93	0.79
Ricinus communis	Kaempferol 3-xyloside	44258912	C1[C@H](C(C([C@@H](O1)OC2=C(OC3=CC(=CC(=C3C2=O)O)O)C4=CC=C(C=C4)O)O)O)O	C20 H18 O10	418.09	10	6	0.39	1.06
Ricinus communis	Methyl indole-3-acetate	74706	COC(=O)CC1=CNC2=CC=CC=C21	C11 H11 N O2	189.08	2	1	1.97	-1.36
Ricinus communis	Naringenin 7-(2-p-Coumaroylglucoside)	42607921	C1C(OC2=CC(=CC(=C2C1=O)O)O[C@H]3C([C@H]([C@@H](C(O3)CO)O)O)OC(=O)/C=C/C4=CC=C(C=C4)O)C5=CC=C(C=C5)O	C30 H28 O12	580.16	12	6	2.15	1.17
Ricinus communis	Reynoutrin	5320863	C1[C@H]([C@@H]([C@H](C(O1)OC2=C(OC3=CC(=CC(=C3C2=O)O)O)C4=CC(=C(C=C4)O)O)O)O)O	C20 H18 O11	434.08	11	7	0.01	1.2
Ricinus communis	Ricinine	10666	CN1C=CC(=C(C1=O)C#N)OC	C8 H8 N2 O2	164.06	3	0	-0.13	-1.02
Ricinus communis	Ricinitin	44259024	CC(=O)OCC1[C@H]([C@@H](C([C@@H](O1)O[C@H]2[C@H](C(O[C@H](C2O)OC3=C(OC4=CC(=CC(=C4C3=O)O)O)C5=CC=C(C=C5)O)CO)O)O)O)O	C29 H32 O17	652.16	17	9	-2.04	0.91
Ricinus communis	Rutin	5280805	C[C@H]1[C@@H]([C@H]([C@H]([C@@H](O1)OC[C@@H]2[C@H]([C@@H]([C@H]([C@@H](O2)OC3=C(OC4=CC(=CC(=C4C3=O)O)O)C5=CC(=C(C=C5)O)O)O)O)O)O)O)O	C27 H30 O16	610.15	16	10	-1.87	1.1
Ricinus communis, Centella asiatica	1,8-Cineole	2758	CC1(C2CCC(O1)(CC2)C)C	C10 H18 O	154.14	1	0	2.93	-1.06
Ricinus communis, Vernonia cinerea	Beta Amyrin	73145	C[C@@]12CC[C@@]3(C(=CC[C@H]4[C@]3(CC[C@@H]5[C@@]4(CC[C@@H](C5(C)C)O)C)C)[C@@H]1CC(CC2)(C)C)C	C30 H50 O	426.39	1	1	9.17	-0.23
Solanum nigrum	Solasodine	442985	C[C@@H]1CC[C@@]2([C@H]([C@H]3[C@@H](O2)C[C@@H]4[C@@]3(CC[C@H]5[C@H]4CC=C6[C@@]5(CC[C@@H](C6)O)C)C)C)NC1	C27H43NO2	413.33	2	2	5.53	0.01
Solanum nigrum	2(S)-2-Aminoadipic-Acid	92136	C(C[C@@H](C(=O)O)N)CC(=O)O	C6 H11 N O4	161.07	5	4	-1.71	0.08
Solanum nigrum	Diosgenin	99474	C[C@@H]1CC[C@@]2([C@H]([C@H]3[C@@H](O2)C[C@@H]4[C@@]3(CC[C@H]5[C@H]4CC=C6[C@@]5(CC[C@@H](C6)O)C)C)C)OC1	C27 H42 O3	414.31	3	1	6.39	-0.04
Solanum nigrum	Tigogenin	99516	C[C@@H]1CC[C@@]2([C@H]([C@H]3[C@@H](O2)C[C@@H]4[C@@]3(CC[C@H]5[C@H]4CC[C@@H]6[C@@]5(CC[C@@H](C6)O)C)C)C)OC1	C27 H44 O3	416.33	3	1	6.43	-0.67
Solanum nigrum	Solasonine	119247	C[C@@H]1CC[C@@]2([C@H]([C@H]3[C@@H](O2)C[C@@H]4[C@@]3(CC[C@H]5[C@H]4CC=C6[C@@]5(CC[C@@H](C6)O[C@H]7[C@@H]([C@H]([C@H]([C@H](O7)CO)O)O[C@H]8[C@@H]([C@H]([C@@H]([C@H](O8)CO)O)O)O)O[C@H]9[C@@H]([C@@H]([C@H]([C@@H](O9)C)O)O)O)C)C)C)NC1	C45 H73 N O16	883.49	17	10	-0.46	0.22
Solanum nigrum	Desgalactotigonin	162401	C[C@@H]1CC[C@@]2([C@H]([C@H]3[C@@H](O2)C[C@@H]4[C@@]3(CC[C@H]5[C@H]4CC[C@@H]6[C@@]5(CC[C@@H](C6)O[C@H]7[C@@H]([C@H]([C@H]([C@H](O7)CO)O[C@H]8[C@@H]([C@H]([C@@H]([C@H](O8)CO)O)O[C@H]9[C@@H]([C@H]([C@@H](CO9)O)O)O)O[C@H]2[C@@H]([C@H]([C@@H]([C@H](O2)CO)O)O)O)O)O)C)C)C)OC1	C50 H82 O22	1034.53	22	12	-2.32	-0.31
Solanum nigrum	Solanine	262500	CC1CCC2C(C3C(N2C1)CC4C3(CCC5C4CC=C6C5(CCC(C6)OC7C(C(C(C(O7)CO)O)OC8C(C(C(C(O8)CO)O)O)O)OC9C(C(C(C(O9)C)O)O)O)C)C)C	C45 H73 N O15	867.5	16	9	-0.7	0.33
Solanum nigrum, Solanum nigrum	Solamargine	73611	C[C@@H]1CC[C@@]2([C@H]([C@H]3[C@@H](O2)C[C@@H]4[C@@]3(CC[C@H]5[C@H]4CC=C6[C@@]5(CC[C@@H](C6)O[C@H]7[C@@H]([C@H]([C@@H]([C@H](O7)CO)O[C@H]8[C@@H]([C@@H]([C@H]([C@@H](O8)C)O)O)O)O)O[C@H]9[C@@H]([C@@H]([C@H]([C@@H](O9)C)O)O)O)C)C)C)NC1	C15 H15 N O3	257.11	3	1	1.93	0.53
Strychnus nuxvomica	Vomicine	101595	CN1CC[C@]23[C@@H]4[C@H]5[C@@H](CC2=O)C(=CCO[C@H]5CC(=O)N4C6=C3C=CC=C6O)C1	C22 H24 N2 O4	380.17	5	1	1.85	0.99
Strychnus nuxvomica	Pseudo-Alpha-Colubrine	102067318	COC1=CC2=C(C=C1)[C@]34CCN5[C@]3(C[C@@H]6[C@@H]7[C@@H]4N2C(=O)C[C@@H]7OCC=C6C5)O	C22 H24 N2 O4	380.14	5	1	1.14	0.8
Strychnus nuxvomica	Condylocarpine	10914255	C/C=C\1/[C@@H]2CCN3[C@H]1[C@]4(CC3)C5=CC=CC=C5NC4=C2C(=O)OC	C20 H22 N2 O2	322.17	3	1	3.55	0.98
Strychnus nuxvomica	Isostrychnine	11024113	C1CN2C/C(=C/CO)/[C@@H]3C[C@H]2[C@@]14[C@@H]5C3=CCC(=O)N5C6=CC=CC=C46	C21 H22 N2 O2	334.17	3	1	2.92	0.75
Strychnus nuxvomica	Brucine-N-Oxide	11122452	COC1=C(C=C2C(=C1)[C@]34CC[N+]5([C@H]3C[C@@H]6[C@@H]7[C@@H]4N2C(=O)C[C@@H]7OCC=C6C5)[O-])OC	C23 H26 N2 O5	410.18	5	0	1.75	0.38
Strychnus nuxvomica	Novacine	12314414	CN1CC[C@]23[C@@H]4[C@H]5[C@@H](CC2=O)C(=CCO[C@H]5CC(=O)N4C6=CC(=C(C=C36)OC)OC)C1	C24 H28 N2 O5	424.2	6	0	2.29	0.68
Strychnus nuxvomica	C-Mavacurine	134716652	C/C=C\1/C[N+]2(CCC3=C4[C@@H]2C[C@@H]1C(N4C5=CC=CC=C35)CO)C	C20 H25 N2 O	309.2	1	1	2.81	0.89
Strychnus nuxvomica	Secologanin	161276	COC(=O)C1=CO[C@H]([C@@H]([C@@H]1CC=O)C=C)O[C@H]2[C@@H]([C@H]([C@@H]([C@H](O2)CO)O)O)O	C17 H24 O10	388.14	10	4	-1.97	-0.13
Strychnus nuxvomica	Hydroxystrychnine	167851	C1CN2CC3=CCO[C@H]4CC(=O)N5[C@H]6[C@H]4[C@H]3C[C@H]2C61C7=C5C=CC(=C7)O	C21 H22 N2 O3	350.16	4	1	1.51	0.72
Strychnus nuxvomica	Pseudostrychnine	21723446	C1CN2CC3=CCOC4CC(=O)N5C6C4C3CC2(C61C7=CC=CC=C75)O	C21 H22 N2 O3	350.16	4	1	1.05	0.77
Strychnus nuxvomica	Beta-Colubrine	251890	COC1=CC2=C(C=C1)N3[C@@H]4[C@]25CCN6[C@H]5C[C@@H]7[C@H]4[C@H](CC3=O)OCC=C7C6	C22 H24 N2 O3	364.18	4	0	1.86	0.48
Strychnus nuxvomica	Pseudobrucine	3083630	COC1=C(C=C2C(=C1)[C@]34CCN5[C@]3(C[C@@H]6[C@@H]7[C@@H]4N2C(=O)C[C@@H]7OCC=C6C5)O)OC	C23 H26 N2 O5	410.18	6	1	1.11	0.74
Strychnus nuxvomica	Icajine	3083907	CN1CC[C@]23[C@@H]4[C@H]5[C@@H](CC2=O)C(=CCO[C@H]5CC(=O)N4C6=CC=CC=C36)C1	C22 H24 N2 O3	364.18	4	0	2.23	0.92
Strychnus nuxvomica	4-Deoxyloganin	440906	C[C@H]1CC[C@H]2[C@@H]1[C@@H](OC=C2C(=O)OC)O[C@H]3[C@@H]([C@H]([C@@H]([C@H](O3)CO)O)O)O	C17 H26 O9	374.16	9	4	-0.94	0.74
Strychnus nuxvomica	Strychnine	441071	C1CN2CC3=CCO[C@H]4CC(=O)N5[C@H]6[C@H]4[C@H]3C[C@H]2[C@@]61C7=CC=CC=C75	C21 H22 N2 O2	334.17	3	0	1.77	0.54
Strychnus nuxvomica	Brucine	442021	COC1=C(C=C2C(=C1)[C@]34CCN5[C@H]3C[C@@H]6[C@@H]7[C@@H]4N2C(=O)C[C@@H]7OCC=C6C5)OC	C23 H26 N2 O4	394.19	5	0	1.83	0.5
Strychnus nuxvomica	Strychnicine	633307	CN1CCC23C4C5C(CC2=O)C(=CCOC5CC(=O)N4C6=C3C=CC=C6O)C1	C22 H24 N2 O4	380.17	5	1	1.85	0.99
Strychnus nuxvomica	Geissoschizine	6443046	C/C=C\1/CN2CCC3=C([C@@H]2C[C@@H]1/C(=C/OC)/C(=O)OC)NC4=CC=CC=C34	C22 H26 N2 O3	366.19	4	1	2.85	0.58
Strychnus nuxvomica	3-Methoxyicajine	71453399	CN1CC[C@]23[C@@H]4[C@H]5[C@@H](CC2=O)C(=C(CO[C@H]5CC(=O)N4C6=CC=CC=C36)OC)C1	C23 H26 N2 O4	394.19	5	0	1.74	1
Strychnus nuxvomica	Strychnine-N-6-Oxide	73393	C1C[N+]2(CC3=CCO[C@H]4CC(=O)N5[C@H]6[C@H]4[C@H]3C[C@H]2[C@@]61C7=CC=CC=C75)[O-]	C21 H22 N2 O3	350.16	3	0	1.69	0.41
Strychnus nuxvomica	Loganin	87691	C[C@H]1[C@H](C[C@H]2[C@@H]1[C@@H](OC=C2C(=O)OC)O[C@H]3[C@@H]([C@H]([C@@H]([C@H](O3)CO)O)O)O)O	C17 H26 O10	390.15	10	5	-1.98	0.98
Strychnus nuxvomica	Loganic-Acid	89640	C[C@H]1[C@H](C[C@H]2[C@@H]1[C@@H](OC=C2C(=O)O)O[C@H]3[C@@H]([C@H]([C@@H]([C@H](O3)CO)O)O)O)O	C16 H24 O10	376.14	10	6	-2.33	1.26
Strychnus nuxvomica	Cycloartenol	92110	C[C@H](CCC=C(C)C)[C@H]1CC[C@@]2([C@@]1(CC[C@]34[C@H]2CC[C@@H]5[C@]3(C4)CC[C@@H](C5(C)C)O)C)C	C30 H50 O	426.39	1	1	9.22	-0.31
Strychnus nuxvomica	Diaboline	321983	CC(=O)N1C2C3C4CC5C2(CCN5CC4=CCOC3O)C6=CC=CC=C61	C21 H24 N2 O3	352.18	4	1	0.93	0.85
Thespesia populnea	Kaempferol-7-Glucoside	10095180	C1=CC(=CC=C1C2=C(C(=O)C3=C(C=C(C=C3O2)O[C@H]4[C@@H]([C@H]([C@@H]([C@H](O4)CO)O)O)O)O)O)O	C21H20O11	448.1	11	7	-0.26	0.81
Thespesia populnea	Mansonones C	21742	CC1=C2C(=C(C=C1)C(C)C)C=C(C(=O)C2=O)C	C15 H16 O2	228.12	2	0	3.52	0
Thespesia populnea	Mansonones D	3083888	CC1COC2=C1C3=C(C(=C2)C)C(=O)C(=O)C(=C3)C	C15 H14 O3	242.09	3	0	3.05	-0.41
Thespesia populnea	Gossypol	3503	CC1=CC2=C(C(=C(C(=C2C(C)C)O)O)C=O)C(=C1C3=C(C4=C(C=C3C)C(=C(C(=C4C=O)O)O)C(C)C)O)O	C30 H30 O8	518.19	8	6	5.7	-1.23
Thespesia populnea	Herbacetin	5280544	C1=CC(=CC=C1C2=C(C(=O)C3=C(O2)C(=C(C=C3O)O)O)O)O	C15H10O7	302.04	7	5	1.99	0.63
Thespesia populnea	Gossypetin	5280647	C1=CC(=C(C=C1C2=C(C(=O)C3=C(O2)C(=C(C=C3O)O)O)O)O)O	C15H10O8	318	8	6	1.61	0.62
Thespesia populnea	Thespesone	5321934	CC1COC2=C1C3=C(C(=C2)C)C(=O)C(=O)C(=C3O)C	C15H14O4	258.09	4	1	2.48	-0.43
Thespesia populnea	Mansonones E	94303	CC1COC2=C(C(=O)C(=O)C3=C(C=CC1=C32)C)C	C15 H14 O3	242.09	3	0	2.37	-0.55
Thespesia populnea	Populneol	2775187	CC(=O)C1=C(C=CC=C1OCC2=CC=CC=C2)O	C15 H14 O3	242.09	3	1	2.81	-0.05
Thespesia populnea	Thespone	5321935	CC1=CC2=C(C(=CC3=C2C(=CO3)C)C)C(=O)C1=O	C15 H12 O3	240.08	3	0	3.3	-0.8
Thespesia populnea, Centella asiatica, Mangifera indica, Aerva lanata, Ricinus communis	Kaempferol	5280863	C1=CC(=CC=C1C2=C(C(=O)C3=C(C=C(C=C3O2)O)O)O)O	C15H10O6	286.05	6	4	2.49	0.77
Thespesia populnea, Centella asiatica, Mangifera indica, Aerva lanata, Ricinus communis	Quercetin	5280343	C1=CC(=C(C=C1C2=C(C(=O)C3=C(C=C(C=C3O2)O)O)O)O)O	C15 H10 O7	302.04	7	5	2.11	0.93
Vernonia cinerea	Luteolin-7-Mono-Beta-D-Glucoside	5280637	C1=CC(=C(C=C1C2=CC(=O)C3=C(C=C(C=C3O2)O[C@H]4[C@@H]([C@H]([C@@H]([C@H](O4)CO)O)O)O)O)O)O	C21H20O11	448.1	11	7	-0.07	0.86
Vernonia cinerea	Vernolic-Acid	6449780	CCCCC[C@@H]1[C@@H](O1)C/C=C\CCCCCCCC(=O)O	C18 H32 O3	296.24	3	1	6.03	-0.96
Vernonia cinerea	Lupeol-Acetate	92157	CC(=C)[C@@H]1CC[C@]2([C@H]1[C@H]3CC[C@@H]4[C@]5(CC[C@@H](C([C@@H]5CC[C@]4([C@@]3(CC2)C)C)(C)C)OC(=O)C)C)C	C32 H52 O2	468.4	2	0	9.45	0.32

## Sheet: Table S3
Table S3: Toxicity profile of phytocompounds
Abbreviations: Pa Probable activity to cause toxicity; Pi Probable inactivity for non-toxicity; Nil Non-toxic
Note: Pa<0.5 and Pi>0.5 values considered to have less toxic effect (non-toxic)
Plant(s)	Phytocompound	PubChem CID	Pa	Pi	Side effect(s)
Achyranthes aspera	(3R,5S)- 1,3,4,5-Tetrahydroxycyclohexane carboxylic acid	1268037	0.491	0.053	Nephrotoxicity
			0.458	0.077	Cardiac failure
Achyranthes aspera	20-hydroxyecdysone	5459840	Nil
Achyranthes aspera	3,4-Dimethoxythiophenol	136539	0.366	0.216	Arrhythmia
			0.333	0.142	Cardiac failure
			0.305	0.188	Myocardial infarction
Achyranthes aspera	3,5- Dihydroxy-6-Methyl-2,3- Dihydro-4H-Pyran-4-one	50918741	0.348	0.116	Nephrotoxicity
			0.295	0.177	Cardiac failure
Achyranthes aspera	Asarone	636822	0.36	0.222	Arrhythmia
Achyranthes aspera	Eugenol	3314	0.316	0.155	Cardiac failure
Achyranthes aspera	α-ionone	5282108	0.352	0.111	Myocardial infarction
Achyranthes aspera	Spathulenol	92231	Nil
Achyranthes aspera, Centella asiatica	2-Furaldehyde	7362	0.316	0.28	Arrhythmia
Aerva lanata	10-O-β-D-glucopyranosyloxycanthin-6-one	15109283	0.414	0.079	Nephrotoxicity
Aerva lanata	6-methoxy-β carboline-1-propionic acid	15109284	0.536	0.04	Cardiac failure
			0.417	0.246	Hepatotoxicity
			0.394	0.073	Myocardial infarction
Aerva lanata	10-methoxycanthine-6-one (methylervine)	158928	0.375	0.207	Arrhythmia
			0.315	0.157	Cardiac failure
Aerva lanata	10-hydroxycanthin-6-one (ervine)	158929	Nil
Aerva lanata	Isorhamnetin 3-(6''-p-coumarylglucoside)	44258025	0.245	0.231	Nephrotoxicity
Aerva lanata	Isorhamnetin	5281654	0.365	0.286	Hepatotoxicity
Aerva lanata	Tiliroside	5320686	0.263	0.198	Nephrotoxicity
Aerva lanata	β-carboline-1 -propionic acid	5375436	0.383	0.079	Myocardial infarction
Aerva lanata	Isorhamnetin 3-(3'',6''-di-p-coumarylglucoside)	44258026	Nil
Aerva lanata	Kaempferol 3-(3'',6''-di-p-coumarylglucoside)	44258868	0.255	0.212	Nephrotoxicity
Aloe vera	Aloe-Emodin	10207	0.51	0.05	Cardiac failure
			0.426	0.24	Hepatotoxicity
			0.263	0.198	Nephrotoxicity
Aloe vera	Chrysophanic-Acid	10208	0.553	0.034	Cardiac failure
			0.526	0.182	Hepatotoxicity
Aloe vera	Isorabaichromone	10370832	0.527	0.042	Nephrotoxicity
Aloe vera	Hydrocinnamic-Acid	107	0.577	0.032	Myocardial infarction
			0.541	0.038	Cardiac failure
			0.397	0.261	Hepatotoxicity
			0.366	0.124	Nephrotoxicity
Aloe vera	Dehydroabietal	11694869	0.321	0.161	Myocardial infarction
Aloe vera	Homonataloin	11968593	0.422	0.076	Nephrotoxicity
Aloe vera	Trihydroxymethylanthraquinone	12309204	0.523	0.183	Hepatotoxicity
			0.463	0.074	Cardiac failure
Aloe vera	Pteroylglutamic-Acid	135444779	0.402	0.084	Nephrotoxicity
Aloe vera	2(3H)-Benzothiazolone	13625	0.907	0.004	Cardiac failure
			0.481	0.206	Hepatotoxicity
			0.392	0.074	Myocardial infarction
Aloe vera	Aloeresin-D	14211225	0.527	0.042	Nephrotoxicity
Aloe vera	Coniferyl-Alcohol	1549095	0.248	0.223	Cardiac failure
Aloe vera	7-Hydroxyaloin	158096	0.435	0.071	Nephrotoxicity
Aloe vera	Aloesin	160190	0.623	0.024	Nephrotoxicity
Aloe vera	Aloenin	162305	0.36	0.108	Nephrotoxicity
Aloe vera	1,8-Dihydroxyanthracene	19786014	0.629	0.129	Hepatotoxicity
			0.37	0.04	Cardiac failure
			0.309	0.29	Arrhythmia
			0.253	0.215	Nephrotoxicity
Aloe vera	Glucomannan	24892726	0.845	0.008	Nephrotoxicity
			0.351	0.299	Hepatotoxicity
Aloe vera	Dibutyl-Phthalate	3026	0.418	0.064	Myocardial infarction
			0.363	0.219	Arrhythmia
			0.329	0.129	Nephrotoxicity
Aloe vera	Aloe-Emodin-Anthranol	3220	0.452	0.08	Cardiac failure
			0.352	0.298	Hepatotoxicity
Aloe vera	Chrysamminic-Acid	3938245	0.571	0.159	Hepatotoxicity
			0.34	0.134	Cardiac failure
Aloe vera	Cinnamic-Acid	444539	0.66	0.018	Myocardial infarction
			0.366	0.285	Hepatotoxicity
			0.27	0.19	Nephrotoxicity
Aloe vera	Gamolenic-Acid	5280933	0.304	0.152	Hepatotoxicity
Aloe vera	Feralolide	5317333	0.281	0.178	Nephrotoxicity
			0.242	0.229	Cardiac failure
Aloe vera	Aloesone	5317700	0.671	0.112	Hepatotoxicity
Aloe vera	Aloesol	5318230	0.689	0.104	Hepatotoxicity
			0.419	0.096	Cardiac failure
Aloe vera	Isocitric-Acid	5318532	0.408	0.252	Hepatotoxicity
			0.344	0.119	Nephrotoxicity
Aloe vera	Linoleic-Acid-Ethyl-Ester	5367460	0.34	0.129	Myocardial infarction
			0.259	0.205	Nephrotoxicity
Aloe vera	Hydroxyproline	5810	0.344	0.118	Nephrotoxicity
Aloe vera	Hexauronic-Acid	610	0.85	0.008	Nephrotoxicity
Aloe vera	P-Methoxybenzylacetone	61007	0.649	0.021	Myocardial infarction
			0.311	0.287	Arrhythmia
			0.249	0.221	Cardiac failure
Aloe vera	4-Hydroxy-3,5-Di-Tert-Butyl-Benzaldehyde	73219	0.14	0.188	Hepatotoxicity
			0.337	0.248	Arrhythmia
Aloe vera	Isoaloeresin-D	76332505	0.527	0.042	Nephrotoxicity
Aloe vera	Monooctylphthalate	79362	0.426	0.074	Nephrotoxicity
			0.413	0.065	myocardial infarction
			0.307	0.294	Arrhythmia
Aloe vera	Hydroxymethylanthraquinone	87014	0.492	0.06	Cardiac failure
			0.433	0.235	Hepatotoxicity
			0.35	0.114	Myocardial infarction
			0.281	0.178	Nephrotoxicity
Aloe vera	M-Protocatechuic-Aldehyde	8768	0.696	0.102	Hepatotoxicity
Aloe vera	2-Methyl-2-Phytyl-6-Chromanol	9865117	0.421	0.244	Hepatotoxicity
Aloe vera	10-Hydroxyaloin-A	14889736	0.508	0.047	Nephrotoxicity
Aloe vera	10-Hydroxyaloin-B	14889737	0.508	0.047	Nephrotoxicity
Aloe vera	Elgonica-Dimer-A	21582596	0.474	0.058	Nephrotoxicity
			0.268	0.204	Cardiac failure
Aloe vera	Aloeresin_A	102247458	0.559	0.033	Nephrotoxicity
Aloe vera	Neoaloesin-A	102445577	0.404	0.083	Nephrotoxicity
Aloe vera	7-Hydroxy-8-O-Methyl-Aloin-B	131751175	0.42	0.076	Nephrotoxicity
Aloe vera	Diheptyl-Phthalate	19284	0.41	0.066	Myocardial infarction
			0.366	0.216	Arrhythmia
			0.347	0.117	Nephrotoxicity
Aloe vera	Casanthranol	2098	0.477	0.07	Nephrotoxicity
Aloe vera	Sulfoquinovosyl-Diglyceride	56842030	0.307	0.149	Nephrotoxicity
Aloe vera	Lysophosphatidyl-Inositol	73755067	0.399	0.086	Nephrotoxicity
Aloe vera	Di-(2-Ethylhexyl)-Phthalate	8343	0.39	0.073	Myocardial infarction
			0.322	0.135	Nephrotoxicity
Aloe vera	Dioctyl-Phthalate	8346	0.41	0.066	Myocardial infarction
			0.366	0.216	Arrhythmia
			0.347	0.117	Nephrotoxicity
Aloe vera, Centella asiatica	Campesterol	173183	Nil
Aloe vera, Centella asiatica	Glutamic-Acid	33032	0.329	0.129	Nephrotoxicity
Aloe vera, Centella asiatica, Strychnus nuxvomica, Vernonia cinerea, Achyranthes aspera, Ricinus communis	Stigmasterol	5280794	Nil
Aloe vera, Centella asiatica, Strychnus nuxvomica, Vernonia cinerea, Achyranthes aspera, Ricinus communis	Stigmasterol	5280794	Nil
Aloe vera, Mangifera indica	Isoleucine	6306	0.435	0.071	Nephrotoxicity
			0.314	0.171	Myocardial infarction
			0.293	0.18	Cardiac failure
Aloe vera, Mangifera indica	P-Coumaric-Acid	637542	0.555	0.035	Myocardial infarction
			0.377	0.276	Hepatotoxicity
Aloe vera, Thespesia populnea, Centella asiatica, Vernonia cinerea, Ricinus communis, Diospyros montana	Beta-Sitosterol	222284	0.258	0.205	Nephrotoxicity
Andrographis paniculata	14-Deoxy-11-Oxoandrographolide	101593061	Nil
Andrographis paniculata	14-Deoxy-11-Dehydroandrographolide	15411809	Nil
Andrographis paniculata	5-Hydroxy-7,8,2'-Trimethoxyflavone	5318506	Nil
Andrographis paniculata	5-Hydroxy-7,8,2',3'-Tetramethoxyflavone	5319878	Nil
Andrographis paniculata	Neoandrographolide	9848024	0.424	0.075	Nephrotoxicity
Andrographis paniculata	Paniculide-A	11821485	Nil
Andrographis paniculata	Paniculide-B	101289823	Nil
Andrographis paniculata	Paniculide-C	101289824	Nil
Andrographis paniculata	Andrographolide	5318517	Nil
Andrographis paniculata	14-Deoxyandrographolide	11624161	0.282	0.176	Nephrotoxicity
Andrographis paniculata	14-Deoxy 11,12-didehydroandrographolide	5708351	Nil
Andrographis paniculata	Isoandrographolide	343585	Nil
Andrographis paniculata	Andrographiside	44593583	0.333	0.126	Nephrotoxicity
Andrographis paniculata	Andrograpanin	11666871	0.261	0.202	Nephrotoxicity
Andrographis paniculata	14-Deoxy-11-hydroxyandrographolide	91884987	Nil
Andrographis paniculata	Andrographolactone	44206466	0.412	0.25	Hepatotoxicity
Andrographis paniculata	19-O-acetyl-14-deoxy-11,12-didehydroandrographolide	46179874	Nil
Andrographis paniculata	Altisin	15100719	0.306	0.296	Arrhythmia
Andrographis paniculata	2'-hydroxy-5,7,8- trimethoxyflavone	21668878	Nil
Andrographis paniculata	5-hydroxy-7,8,2',3',4'- pentamethoxyflavone	12315479	Nil
Andrographis paniculata	Wightin	12444943	0.342	0.308	Hepatotoxicity
Andrographis paniculata	5-hydroxy-7,8-dimethoxyflavanone	13963770	0.322	0.269	Arrhythmia
Andrographis paniculata	5-hydroxy-7,8-dimethoxyflavone	188316	0.309	0.291	Arrhythmia
Andrographis paniculata	Skullcapflavone I	5320399	Nil
Andrographis paniculata	5-hydroxy-7,8,2',5'- tetramethoxyflavone	10948318	Nil
Andrographis paniculata	5,4'-dihydroxy-7,8,2',3'- tetramethoxyflavone	13963777	Nil
Andrographis paniculata	Skullcapflavone II	124211	0.348	0.302	Hepatotoxicity
Andrographis paniculata	Andrographidine A	13963762	0.43	0.072	Nephrotoxicity
Andrographis paniculata	Andrographidine C	5318484	0.348	0.116	Nephrotoxicity
Cassia auriculata	Pelargonidin 5-galactoside	44256698	Nil
Centella asiatica	2,3-Dihydrobenzofuran	10329	0.401	0.258	Hepatotoxicity
			0.322	0.269	Arrhythmia
Centella asiatica	Epiglobulol	11858788	Nil
Centella asiatica	Beta-Sesquiphellandrene	12315492	Nil
Centella asiatica	7-Glucosylkaempferol	129856029	0.633	0.128	Hepatotoxicity
			0.304	0.152	Nephrotoxicity
Centella asiatica	Borneol-Acetate	14019266	Nil
Centella asiatica	Beta-Pinene	14896	Nil
Centella asiatica	Caryophyllene-Oxide	1742210	Nil
Centella asiatica	P-Vinyl-Guaiacol	332	0.338	0.138	Cardiac failure
Centella asiatica	Delta-Cadinene	441005	Nil
Centella asiatica	Madecassic-Acid	51531966	Nil
Centella asiatica	3-Glucosylquercetin	5280804	0.369	0.282	Hepatotoxicity
			0.302	0.155	Nephrotoxicity
Centella asiatica	3-Glucosylkaempferol	5282102	0.35	0.3	Hepatotoxicity
			0.332	0.127	Nephrotoxicity
Centella asiatica	Nerolidol	5284507	Nil
Centella asiatica	Bicycloelemene	56842786	Nil
Centella asiatica	Geraniol	637566	Nil
Centella asiatica	Nerol	643820	Nil
Centella asiatica	Linalool	6549	Nil
Centella asiatica	Beta-Elemene	6918391	Nil
Centella asiatica	Isobrahmic-Acid	73412	Nil
Centella asiatica	Gamma-Terpinene	7461	0.496	0.197	Hepatotoxicity
			0.457	0.143	Arrhythmia
Centella asiatica	Meso-Inositol	892	0.595	0.027	Nephrotoxicity
Centella asiatica	Germacrene-D	91723653	Nil
Centella asiatica	Germacrene	9548705	Nil
Centella asiatica	Widdrene	97829	0.325	0.154	Myocardial infarction
Centella asiatica	Isothankunic-Acid	12302703	Nil
Centella asiatica	Madasiatic-Acid	23132225	Nil
Centella asiatica	Brahmic-Acid	258809	Nil
Centella asiatica, Leucas aspera	Beta-Caryophyllene	5281515	Nil
Centella asiatica, Leucas aspera	Alpha-Humulene	5281520	Nil
Centella asiatica, Mangifera indica	Limonene	22311	0.337	0.248	Arrhythmia
Centella asiatica, Pongamia pinnata, Diospyros montana, Centella asiatica	Betulic-Acid	64971	Nil
Diospyros montana	Allobetulin	11080733	Nil
Diospyros montana	Fucostanol	15559396	0.374	0.1	Nephrotoxicity
Diospyros montana	Mamegakinone	167673	0.542	0.038	Cardiac failure
			0.457	0.22	Hepatotoxicity
Diospyros montana	Ramentaceone	26905	0.521	0.046	Cardiac failure
			0.452	0.223	Hepatotoxicity
Diospyros montana	Euclein	308140	0.662	0.009	Cardiac failure
			0.599	0.144	Hepatotoxicity
			0.252	0.216	Nephrotoxicity
Diospyros montana	Yerrinquinone	618938	Nil
Diospyros montana	Biramentaceone	633060	0.54	0.038	Cardiac failure
			0.457	0.22	Hepatotoxicity
Diospyros montana	Ursolic Acid	64945	Nil
Diospyros montana	Betulin	72326	Nil
Diospyros montana	Isodiospyrin	99298	0.612	0.137	Hepatotoxicity
			0.57	0.028	Cardiac failure
			0.474	0.08	Nephrotoxicity
			0.303	0.3	Arrhythmia
Diospyros montana	Oxyallobetulin	304256	Nil
Diospyros montana	Astrantiagenin C	10494	Nil
Diospyros montana	Ursolic Acid	64945	Nil
Diospyros montana, Aloe vera, Pongamia pinnata, Vernonia cinerea, Ricinus communis	Lupeol	259846	Nil
Diospyros montana, Aloe vera, Pongamia pinnata, Vernonia cinerea, Ricinus communis	Lupeol	259846	Nil
Diospyros montana, Strychnus nuxvomica, Ricinus communis	Alpha-Amyrin	73170	Nil
Leucas aspera	Acacetin	5280442	0.414	0.248	Hepatotoxicity
Leucas aspera	Apigenin	5280443	0.525	0.182	Hepatotoxicity
Leucas aspera	Asperphenamate	173952	0.529	0.039	Myocardial infarction
			0.277	0.182	Nephrotoxicity
Leucas aspera	(-)-Chicanine	53360432	0.501	0.195	Hepatotoxicity
Leucas aspera	Chrysoeriol	5280666	0.365	0.286	Hepatotoxicity
Leucas aspera	Erythro-2-(4-allyl-2,6-dimethoxyphenoxy)-1-(4-hydroxy-3-methoxyphenyl)propan-1-ol	23872112	0.347	0.132	Cardiac failure
Leucas aspera	Leucasperol B	101403654	0.27	0.19	Nephrotoxicity
Leucas aspera	Leucasperone B	11844108	Nil
Leucas aspera	Leucasperones A	11843975	Nil
Leucas aspera	Leucasperoside A	11844112	0.336	0.124	Nephrotoxicity
Leucas aspera	Leucasperoside B	11844236	0.357	0.11	Nephrotoxicity
Leucas aspera	Linifolioside	15953779	0.365	0.105	Nephrotoxicity
Leucas aspera	Macelignan	10404245	0.731	0.088	Hepatotoxicity
Leucas aspera	Maslinic acid	73659	Nil
Leucas aspera	meso-dihydroguaiaretic acid	476856	0.501	0.055	Cardiac failure
			0.256	0.21	Nephrotoxicity
			0.427	0.239	Hepatotoxicity
			0.377	0.083	Myocardial infarction
			0.346	0.237	Arrhythmia
Leucas aspera	Myristargenol B	5703 (greenmolBD)	0.5	0.055	Cardiac failure
			0.356	0.227	Arrhythmia
			0.341	0.309	Hepatotoxicity
			0.333	0.14	Myocardial infarction
Leucas aspera	Nectandrin B	156517	0.342	0.242	Arrhythmia
			0.245	0.231	Nephrotoxicity
Leucas aspera, Achyranthes aspera, Ricinus communis, Aloe vera, Solanum nigrum, Thespesia populnea, Centella asiatica, Mangifera indica, Strychnus nuxvomica, Vernonia cinerea	Linoleic acid	5280450	0.304	0.152	Nephrotoxicity
Mangifera indica	Mangiferonic-Acid	14034474	0.283	0.176	Nephrotoxicity
Mangifera indica	Gibberellin A29	14605548	Nil
Mangifera indica	Dihydrozeatin	32021	0.548	0.171	Hepatotoxicity
			0.402	0.084	Nephrotoxicity
Mangifera indica	Violaxanthin	448438	0.562	0.034	Myocardial infarction
Mangifera indica	Trans-Zeatin	449093	0.627	0.13	Hepatotoxicity
			0.284	0.24	Myocardial infarction
			0.272	0.188	Nephrotoxicity
Mangifera indica	Mangiferolic-Acid	45270099	0.291	0.167	Nephrotoxicity
Mangifera indica	23-Hydroxy-mangiferonic acid	45271778	0.385	0.093	Nephrotoxicity
Mangifera indica	Gibberellin A1	5280379	Nil
Mangifera indica	Gibberellin A20	5280481	Nil
Mangifera indica	Linolenic-Acid	5280934	0.252	0.216	Nephrotoxicity
Mangifera indica	5,6-epoxy-beta-Carotene / beta-Carotene 5,6-epoxide	5281231	0.765	0.008	Myocardial infarction
Mangifera indica	Mangiferin	5281647	0.55	0.035	Nephrotoxicity
Mangifera indica	5-(Heptadec-12-enyl)resorcinol	5281859	0.311	0.177	Myocardial infarction
Mangifera indica	Gibberellin A19	5460209	Nil
Mangifera indica	Leucine	6106	0.377	0.115	Cardiac failure
			0.361	0.099	myocardial infarction
			0.35	0.115	Nephrotoxicity
Mangifera indica	Gamma-Eudesmol	6432005	Nil
Mangifera indica	Mangiferic-Acid	6439027	0.291	0.167	Nephrotoxicity
Mangifera indica	Gibberellin A3	6466	Nil
Mangifera indica	Rubrofusarin	72537	0.544	0.037	Cardiac failure
Mangifera indica	Cyanidin 3-arabinoside	74079809	Nil
Mangifera indica	5-Pentadecylresorcinol	76617	0.409	0.252	Hepatotoxicity
			0.349	0.233	Arrhythmia
			0.302	0.194	Myocardial infarction
Mangifera indica	N6-(delta2-Isopentenyl)adenine	92180	0.613	0.137	Hepatotoxicity
Mangifera indica	Butin / 7,3',4'-Trihydroxyflavanone	92775	0.692	0.103	Hepatotoxicity
Mangifera indica	Isomangiferolic-Acid	14034465	0.291	0.167	Nephrotoxicity
Mangifera indica	Myrtillin	165558	Nil
Mangifera indica	Petunidin 3-glucoside	176449	Nil
Mangifera indica	Peonidin galactoside	91810512	Nil
Phyllanthus virgatus	Kaempferol 8-C-sulfate	10500456	Nil
Phyllanthus virgatus	Virgatyne	10807051	0.901	0.026	Hepatotoxicity
Phyllanthus virgatus	Lirioresinol B	11604108	Nil
Phyllanthus virgatus	3,5,7-Trihydroxyflavone 3-glucoside-8-sulfate	44258728	0.312	0.144	Nephrotoxicity
Phyllanthus virgatus	Hinokinin	442879	0.671	0.111	Hepatotoxicity
Pongamia pinnata	Praecansone B	10090306	0.6	0.144	Hepatotoxicity
Pongamia pinnata	Stigmasterol-3-O-Beta-D-Glucopyranoside	101689889	0.357	0.111	Nephrotoxicity
Pongamia pinnata	7-Methoxypraecansone B	10452362	0.525	0.182	Hepatotoxicity
Pongamia pinnata	Ovalichromene B	10981007	0.739	0.085	Hepatotoxicity
Pongamia pinnata	Pongamone A	11588678	0.397	0.106	Cardiac failure
Pongamia pinnata	Pongacoumestan	12135223	0.349	0.301	Hepatotoxicity
Pongamia pinnata	Pongapinone B	127022	Nil
Pongamia pinnata	Isopongaglabol	12778491	Nil
Pongamia pinnata	Pongachromene	14033985	0.747	0.082	Hepatotoxicity
Pongamia pinnata	Ponganone III	15160702	Nil
Pongamia pinnata	Pongachin	155236	Nil
Pongamia pinnata	Candidone	157102	Nil
Pongamia pinnata	3'-Methoxypongapin	15838767	Nil
Pongamia pinnata	Pongapin	3083586	0.373	0.279	Hepatotoxicity
Pongamia pinnata	Pinnatin	5320607	Nil
Pongamia pinnata	Pongapinone A	6438794	0.809	0.058	Hepatotoxicity
Pongamia pinnata	Lupenone	92158	Nil
Ricinus communis	Corilagin	73568	Nil
Ricinus communis	Ellagic acid	5281855	Nil
Ricinus communis	Ent-Copalyldiphosphate	5280897	Nil
Ricinus communis	Gentisic acid	3469	0.442	0.229	Hepatotoxicity
			0.409	0.081	Nephrotoxicity
Ricinus communis	Kaempferol 3-xyloside	44258912	Nil
Ricinus communis	Methyl indole-3-acetate	74706	0.773	0.008	Myocardial infarction
			0.471	0.07	Cardiac failure
			0.373	0.209	Arrhythmia
Ricinus communis	Naringenin 7-(2-p-Coumaroylglucoside)	42607921	0.402	0.084	Nephrotoxicity
Ricinus communis	Reynoutrin	5320863	Nil
Ricinus communis	Ricinine	10666	0.385	0.198	Arrhythmia
Ricinus communis	Ricinitin	44259024	0.328	0.325	Hepatotoxicity
			0.307	0.149	Nephrotoxicity
Ricinus communis	Rutin	5280805	0.384	0.271	Hepatotoxicity
			0.247	0.228	Nephrotoxicity
Ricinus communis, Centella asiatica	1,8-Cineole	2758	Nil
Ricinus communis, Vernonia cinerea	Beta Amyrin	73145	Nil
Solanum nigrum	Solasodine	442985	Nil
Solanum nigrum	2(S)-2-Aminoadipic-Acid	92136	0.348	0.116	Nephrotoxicity
Solanum nigrum	Diosgenin	99474	Nil
Solanum nigrum	Tigogenin	99516	Nil
Solanum nigrum	Solasonine	119247	0.284	0.174	Nephrotoxicity
Solanum nigrum	Desgalactotigonin	162401	0.354	0.112	Nephrotoxicity
Solanum nigrum	Solanine	262500	0.31	0.146	Nephrotoxicity
Solanum nigrum, Solanum nigrum	Solamargine	73611	0.27	0.189	Nephrotoxicity
Strychnus nuxvomica	Vomicine	101595	0.315	0.282	Arrhythmia
Strychnus nuxvomica	Pseudo-Alpha-Colubrine	102067318	Nil
Strychnus nuxvomica	Condylocarpine	10914255	0.574	0.059	Arrhythmia
			0.3787	0.083	Myocardial infarction
Strychnus nuxvomica	Isostrychnine	11024113	Nil
Strychnus nuxvomica	Brucine-N-Oxide	11122452	0.304	0.299	Arrhythmia
Strychnus nuxvomica	Novacine	12314414	0.43	0.163	Arrhythmia
Strychnus nuxvomica	C-Mavacurine	134716652	Nil
Strychnus nuxvomica	Secologanin	161276	0.383	0.094	Nephrotoxicity
Strychnus nuxvomica	Hydroxystrychnine	167851	Nil
Strychnus nuxvomica	Pseudostrychnine	21723446	Nil
Strychnus nuxvomica	Beta-Colubrine	251890	0.392	0.191	Arrhythmia
Strychnus nuxvomica	Pseudobrucine	3083630	Nil
Strychnus nuxvomica	Icajine	3083907	0.37	0.212	Arrhythmia
Strychnus nuxvomica	4-Deoxyloganin	440906	0.484	0.055	Nephrotoxicity
Strychnus nuxvomica	Strychnine	441071	0.333	0.253	Arrhythmia
Strychnus nuxvomica	Brucine	442021	0.388	0.195	Arrhythmia
Strychnus nuxvomica	Strychnicine	633307	0.315	0.282	Arrhythmia
Strychnus nuxvomica	Geissoschizine	6443046	0.4	0.07	Myocardial infarction
Strychnus nuxvomica	3-Methoxyicajine	71453399	0.444	0.153	Arrhythmia
Strychnus nuxvomica	Strychnine-N-6-Oxide	73393	Nil
Strychnus nuxvomica	Loganin	87691	0.473	0.059	Nephrotoxicity
Strychnus nuxvomica	Loganic-Acid	89640	0.559	0.033	Nephrotoxicity
Strychnus nuxvomica	Cycloartenol	92110	Nil
Strychnus nuxvomica	Diaboline	321983	0.28	0.207	Nephrotoxicity
Thespesia populnea	Kaempferol-7-Glucoside	10095180	0.363	0.288	Hepatotoxicity
			0.329	0.129	Nephrotoxicity
Thespesia populnea	Mansonones C	21742	0.757	0.077	Hepatotoxicity
			0.383	0.2	Arrhythmia
			0.242	0.23	Cardiac failure
Thespesia populnea	Mansonones D	3083888	0.485	0.203	Hepatotoxicity
Thespesia populnea	Gossypol	3503	0.334	0.252	Arrhythmia
Thespesia populnea	Herbacetin	5280544	0.411	0.25	Hepatotoxicity
Thespesia populnea	Gossypetin	5280647	0.392	0.265	Hepatotoxicity
Thespesia populnea	Thespesone	5321934	0.345	0.305	Hepatotoxicity
Thespesia populnea	mansonones E	94303	Nil
Thespesia populnea	mansonones F	94304	Nil
Thespesia populnea	Populneol	2775187	0.735	0.006	Cardiac failure
			0.468	0.213	Hepatotoxicity
			0.393	0.19	Arrhythmia
Thespesia populnea	Thespone	5321935	0.4	0.258	Hepatotoxicity
Thespesia populnea, Centella asiatica, Mangifera indica, Aerva lanata, Ricinus communis	Kaempferol	5280863	0.525	0.182	Hepatotoxicity
Thespesia populnea, Centella asiatica, Mangifera indica, Aerva lanata, Ricinus communis	Kaempferol	5280863	0.525	0.182	Hepatotoxicity
Thespesia populnea, Centella asiatica, Mangifera indica, Aerva lanata, Ricinus communis	Quercetin	5280343	0.559	0.165	Hepatotoxicity
Vernonia cinerea	Luteolin-7-Mono-Beta-D-Glucoside	5280637	0.395	0.262	Hepatotoxicity
			0.373	0.1	Nephrotoxicity
Vernonia cinerea	Vernolic-Acid	6449780	0.336	0.124	Nephrotoxicity
			0.334	0.317	Hepatotoxicity
Vernonia cinerea	Lupeol-Acetate	92157	Nil

## Sheet: Table S4
Table S4: Overall probable targets modulated by the phytocompounds (Predicted using BindingDB)
35 Phytocompounds predicted to modulate 206 targets
Phytocompound	Gene ID	P-value (>0.7)
2-Methyl-2-Phytyl-6-Chromanol	ALOX5	0.7
2-Methyl-2-Phytyl-6-Chromanol	CNR1	0.7
2-Methyl-2-Phytyl-6-Chromanol	CNR2	0.7
2-Methyl-2-Phytyl-6-Chromanol	ESR1	0.72
2-Methyl-2-Phytyl-6-Chromanol	ESR1	0.72
2-Methyl-2-Phytyl-6-Chromanol	HRH3	0.72
2-Methyl-2-Phytyl-6-Chromanol	PPARG	0.7
2-Methyl-2-Phytyl-6-Chromanol	PPARA	0.7
2-Methyl-2-Phytyl-6-Chromanol	PHLPP1	0.87
2-Methyl-2-Phytyl-6-Chromanol	AKT1	0.87
3-Glucosylkaempferol	ADORA1	0.7
3-Glucosylkaempferol	ADORA3	0.7
3-Glucosylkaempferol	AKR1B1	0.86
3-Glucosylkaempferol	ADRA2A	0.87
3-Glucosylkaempferol	ALOX5	0.71
3-Glucosylkaempferol	CA12	0.84
3-Glucosylkaempferol	CA2	0.88
3-Glucosylkaempferol	CA4	0.84
3-Glucosylkaempferol	CA7	0.84
3-Glucosylkaempferol	PDE5A	0.86
3-Glucosylkaempferol	CHRM5	0.85
3-Glucosylkaempferol	CYP3A	0.78
3-Glucosylkaempferol	EGFR	0.7
3-Glucosylkaempferol	IL2RA	0.76
3-Glucosylkaempferol	ALPI	0.81
3-Glucosylkaempferol	NOX4	0.87
3-Glucosylkaempferol	HPA	0.91
3-Glucosylkaempferol	PTPN1	0.97
3-Glucosylkaempferol	RPS6KA3	0.77
3-Glucosylkaempferol	F10	0.84
3-Glucosylkaempferol	TNF	0.76
3-Glucosylquercetin	ADORA1	0.7
3-Glucosylquercetin	ADORA3	0.7
3-Glucosylquercetin	AKR1B1	0.89
3-Glucosylquercetin	ADRA2A	0.89
3-Glucosylquercetin	ALOX5	0.7
3-Glucosylquercetin	CA12	0.84
3-Glucosylquercetin	CA2	0.87
3-Glucosylquercetin	CA4	0.84
3-Glucosylquercetin	CA7	0.84
3-Glucosylquercetin	PDE5A	0.85
3-Glucosylquercetin	CHRM5	0.88
3-Glucosylquercetin	CYP3A	0.79
3-Glucosylquercetin	EGFR	0.7
3-Glucosylquercetin	IL2RA	0.79
3-Glucosylquercetin	ALPI	0.84
3-Glucosylquercetin	NOX4	0.89
3-Glucosylquercetin	HPA	0.94
3-Glucosylquercetin	PTPN1	1
3-Glucosylquercetin	RPS6KA3	0.77
3-Glucosylquercetin	F10	0.86
3-Glucosylquercetin	TNF	0.79
5-Hydroxy-782'3'-Tetramethoxyflavone	ALOX12	0.71
5-Hydroxy-782'3'-Tetramethoxyflavone	FASN	0.72
5-Hydroxy-782'3'-Tetramethoxyflavone	ACHE	0.7
5-Hydroxy-782'3'-Tetramethoxyflavone	ADORA1	0.77
5-Hydroxy-782'3'-Tetramethoxyflavone	ADORA3	0.74
5-Hydroxy-782'3'-Tetramethoxyflavone	ADORA2A	0.71
5-Hydroxy-782'3'-Tetramethoxyflavone	AKR1B1	0.88
5-Hydroxy-782'3'-Tetramethoxyflavone	ALR2	0.7
5-Hydroxy-782'3'-Tetramethoxyflavone	AKR1B1	0.74
5-Hydroxy-782'3'-Tetramethoxyflavone	GAA	0.7
5-Hydroxy-782'3'-Tetramethoxyflavone	MAOB	0.7
5-Hydroxy-782'3'-Tetramethoxyflavone	ALOX12	0.7
5-Hydroxy-782'3'-Tetramethoxyflavone	ALOX15	0.7
5-Hydroxy-782'3'-Tetramethoxyflavone	ALOX5	0.7
5-Hydroxy-782'3'-Tetramethoxyflavone	CYP19A1	0.74
5-Hydroxy-782'3'-Tetramethoxyflavone	AHR	0.7
5-Hydroxy-782'3'-Tetramethoxyflavone	ABCG2	0.74
5-Hydroxy-782'3'-Tetramethoxyflavone	AURKB	0.74
5-Hydroxy-782'3'-Tetramethoxyflavone	NTRK2	0.72
5-Hydroxy-782'3'-Tetramethoxyflavone	CA12	0.78
5-Hydroxy-782'3'-Tetramethoxyflavone	CA2	0.78
5-Hydroxy-782'3'-Tetramethoxyflavone	CA4	0.72
5-Hydroxy-782'3'-Tetramethoxyflavone	CA7	0.78
5-Hydroxy-782'3'-Tetramethoxyflavone	CBR1	0.7
5-Hydroxy-782'3'-Tetramethoxyflavone	CISD1	0.7
5-Hydroxy-782'3'-Tetramethoxyflavone	CDK1	0.71
5-Hydroxy-782'3'-Tetramethoxyflavone	CDK5	0.71
5-Hydroxy-782'3'-Tetramethoxyflavone	CDK6	0.71
5-Hydroxy-782'3'-Tetramethoxyflavone	PTGS1	0.72
5-Hydroxy-782'3'-Tetramethoxyflavone	CYP1A1	0.7
5-Hydroxy-782'3'-Tetramethoxyflavone	CYP1B1	0.74
5-Hydroxy-782'3'-Tetramethoxyflavone	TOP1	0.72
5-Hydroxy-782'3'-Tetramethoxyflavone	NT5E	0.74
5-Hydroxy-782'3'-Tetramethoxyflavone	ELAVL3	0.74
5-Hydroxy-782'3'-Tetramethoxyflavone	INHA	0.74
5-Hydroxy-782'3'-Tetramethoxyflavone	EGFR	0.7
5-Hydroxy-782'3'-Tetramethoxyflavone	HSD17B2	0.7
5-Hydroxy-782'3'-Tetramethoxyflavone	GSK3B	0.72
5-Hydroxy-782'3'-Tetramethoxyflavone	GLO1	0.74
5-Hydroxy-782'3'-Tetramethoxyflavone	HGF	0.74
5-Hydroxy-782'3'-Tetramethoxyflavone	TNKS	0.7
5-Hydroxy-782'3'-Tetramethoxyflavone	TNKS2	0.7
5-Hydroxy-782'3'-Tetramethoxyflavone	IGF1R	0.74
5-Hydroxy-782'3'-Tetramethoxyflavone	PSIP1	0.74
5-Hydroxy-782'3'-Tetramethoxyflavone	DNPEP	0.74
5-Hydroxy-782'3'-Tetramethoxyflavone	KIT	0.7
5-Hydroxy-782'3'-Tetramethoxyflavone	MMP12	0.72
5-Hydroxy-782'3'-Tetramethoxyflavone	MAOA	0.74
5-Hydroxy-782'3'-Tetramethoxyflavone	OPRM1	0.81
5-Hydroxy-782'3'-Tetramethoxyflavone	NOX4	0.74
5-Hydroxy-782'3'-Tetramethoxyflavone	NR0B1	0.7
5-Hydroxy-782'3'-Tetramethoxyflavone	ABCB1	0.7
5-Hydroxy-782'3'-Tetramethoxyflavone	PIK3CG	0.74
5-Hydroxy-782'3'-Tetramethoxyflavone	UBE3A	0.74
5-Hydroxy-782'3'-Tetramethoxyflavone	PIM1	0.74
5-Hydroxy-782'3'-Tetramethoxyflavone	NEU1	0.78
5-Hydroxy-782'3'-Tetramethoxyflavone	SI	0.7
5-Hydroxy-782'3'-Tetramethoxyflavone	SYN1	0.75
5-Hydroxy-782'3'-Tetramethoxyflavone	TERT	0.76
5-Hydroxy-782'3'-Tetramethoxyflavone	F10	0.7
5-Hydroxy-782'3'-Tetramethoxyflavone	TTR	0.72
5-Hydroxy-782'3'-Tetramethoxyflavone	TYR	0.76
5-Hydroxy-782'3'-Tetramethoxyflavone	LCK	0.7
5-Hydroxy-782'3'-Tetramethoxyflavone	FLT3	0.72
5-Hydroxy-782'3'-Tetramethoxyflavone	AXL	0.74
5-Hydroxy-782'3'-Tetramethoxyflavone	KDR	0.7
5-Hydroxy-782'3'-Tetramethoxyflavone	XDH	0.72
5-Hydroxy-782'-Trimethoxyflavone	ALOX12	0.7
5-Hydroxy-782'-Trimethoxyflavone	AKR1C3	0.7
5-Hydroxy-782'-Trimethoxyflavone	FASN	0.7
5-Hydroxy-782'-Trimethoxyflavone	ACHE	0.7
5-Hydroxy-782'-Trimethoxyflavone	ADORA1	0.81
5-Hydroxy-782'-Trimethoxyflavone	ADORA3	0.78
5-Hydroxy-782'-Trimethoxyflavone	ADORA2A	0.76
5-Hydroxy-782'-Trimethoxyflavone	AKR1B1	0.86
5-Hydroxy-782'-Trimethoxyflavone	ALR2	0.7
5-Hydroxy-782'-Trimethoxyflavone	AKR1B1	0.71
5-Hydroxy-782'-Trimethoxyflavone	GAA	0.72
5-Hydroxy-782'-Trimethoxyflavone	MAOA	0.7
5-Hydroxy-782'-Trimethoxyflavone	ALOX12	0.72
5-Hydroxy-782'-Trimethoxyflavone	ALOX15	0.72
5-Hydroxy-782'-Trimethoxyflavone	ALOX5	0.72
5-Hydroxy-782'-Trimethoxyflavone	CYP19A1	0.7
5-Hydroxy-782'-Trimethoxyflavone	AHR	0.74
5-Hydroxy-782'-Trimethoxyflavone	ABCG2	0.71
5-Hydroxy-782'-Trimethoxyflavone	AURKB	0.71
5-Hydroxy-782'-Trimethoxyflavone	NTRK2	0.76
5-Hydroxy-782'-Trimethoxyflavone	BCHE	0.71
5-Hydroxy-782'-Trimethoxyflavone	CA12	0.72
5-Hydroxy-782'-Trimethoxyflavone	CA2	0.72
5-Hydroxy-782'-Trimethoxyflavone	CA4	0.7
5-Hydroxy-782'-Trimethoxyflavone	CA7	0.72
5-Hydroxy-782'-Trimethoxyflavone	CBR1	0.7
5-Hydroxy-782'-Trimethoxyflavone	CSNK2A1	0.7
5-Hydroxy-782'-Trimethoxyflavone	CISD1	0.74
5-Hydroxy-782'-Trimethoxyflavone	BCHE	0.7
5-Hydroxy-782'-Trimethoxyflavone	CDK1	0.7
5-Hydroxy-782'-Trimethoxyflavone	CDK5	0.7
5-Hydroxy-782'-Trimethoxyflavone	CDK6	0.7
5-Hydroxy-782'-Trimethoxyflavone	PTGS1	0.7
5-Hydroxy-782'-Trimethoxyflavone	CFTR	0.7
5-Hydroxy-782'-Trimethoxyflavone	CYP1A1	0.74
5-Hydroxy-782'-Trimethoxyflavone	CYP2C9	0.71
5-Hydroxy-782'-Trimethoxyflavone	TOP1	0.7
5-Hydroxy-782'-Trimethoxyflavone	DRD2	0.7
5-Hydroxy-782'-Trimethoxyflavone	NT5E	0.71
5-Hydroxy-782'-Trimethoxyflavone	ELAVL3	0.71
5-Hydroxy-782'-Trimethoxyflavone	INHA	0.71
5-Hydroxy-782'-Trimethoxyflavone	EGFR	0.7
5-Hydroxy-782'-Trimethoxyflavone	HSD17B1	0.7
5-Hydroxy-782'-Trimethoxyflavone	HSD17B2	0.74
5-Hydroxy-782'-Trimethoxyflavone	ESR1	0.7
5-Hydroxy-782'-Trimethoxyflavone	GSK3B	0.7
5-Hydroxy-782'-Trimethoxyflavone	GLO1	0.71
5-Hydroxy-782'-Trimethoxyflavone	HGF	0.71
5-Hydroxy-782'-Trimethoxyflavone	TNKS	0.7
5-Hydroxy-782'-Trimethoxyflavone	TNKS2	0.7
5-Hydroxy-782'-Trimethoxyflavone	IGF1R	0.71
5-Hydroxy-782'-Trimethoxyflavone	PSIP1	0.71
5-Hydroxy-782'-Trimethoxyflavone	DNPEP	0.71
5-Hydroxy-782'-Trimethoxyflavone	KIT	0.74
5-Hydroxy-782'-Trimethoxyflavone	MMP12	0.7
5-Hydroxy-782'-Trimethoxyflavone	MAOA	0.71
5-Hydroxy-782'-Trimethoxyflavone	OPRM1	0.86
5-Hydroxy-782'-Trimethoxyflavone	NOX4	0.71
5-Hydroxy-782'-Trimethoxyflavone	NR0B1	0.74
5-Hydroxy-782'-Trimethoxyflavone	ABCB1	0.72
5-Hydroxy-782'-Trimethoxyflavone	PIK3CG	0.71
5-Hydroxy-782'-Trimethoxyflavone	UBE3A	0.71
5-Hydroxy-782'-Trimethoxyflavone	PIM1	0.71
5-Hydroxy-782'-Trimethoxyflavone	NEU1	0.75
5-Hydroxy-782'-Trimethoxyflavone	SIGMAR1	0.7
5-Hydroxy-782'-Trimethoxyflavone	SI	0.72
5-Hydroxy-782'-Trimethoxyflavone	SYN1	0.72
5-Hydroxy-782'-Trimethoxyflavone	TERT	0.74
5-Hydroxy-782'-Trimethoxyflavone	F10	0.7
5-Hydroxy-782'-Trimethoxyflavone	TTR	0.7
5-Hydroxy-782'-Trimethoxyflavone	TYR	0.74
5-Hydroxy-782'-Trimethoxyflavone	LCK	0.7
5-Hydroxy-782'-Trimethoxyflavone	FLT3	0.7
5-Hydroxy-782'-Trimethoxyflavone	AXL	0.71
5-Hydroxy-782'-Trimethoxyflavone	KDR	0.7
5-Hydroxy-782'-Trimethoxyflavone	XDH	0.8
5-Hydroxy-782'-Trimethoxyflavone	XDH	0.7
Aloe-Emodin	ACHE	0.7
Aloe-Emodin	MAOA	0.71
Aloe-Emodin	BCL2	0.72
Aloe-Emodin	ALOX5	0.82
Aloe-Emodin	CYP19A1	0.76
Aloe-Emodin	CSNK2A1	0.85
Aloe-Emodin	ESR1	0.85
Aloe-Emodin	HPN	0.75
Aloe-Emodin	MCL1	0.72
Aloe-Emodin	LIMK1	0.73
Aloe-Emodin	LCK	0.73
Aloenin	IL2RA	0.7
Aloenin	F10	0.7
Aloenin	TNF	0.7
Cyanidin 3-arabinoside	AKR1B1	0.87
Cyanidin 3-arabinoside	ADRA2A	0.87
Cyanidin 3-arabinoside	CA12	0.75
Cyanidin 3-arabinoside	CA2	0.85
Cyanidin 3-arabinoside	CA4	0.75
Cyanidin 3-arabinoside	CA7	0.75
Cyanidin 3-arabinoside	PDE5A	0.75
Cyanidin 3-arabinoside	CHRM5	0.85
Cyanidin 3-arabinoside	CYP3A	0.76
Cyanidin 3-arabinoside	IL2RA	0.72
Cyanidin 3-arabinoside	ALPI	0.81
Cyanidin 3-arabinoside	NOX4	0.87
Cyanidin 3-arabinoside	HPA	0.83
Cyanidin 3-arabinoside	PTPN1	0.89
Cyanidin 3-arabinoside	RPS6KA3	0.73
Cyanidin 3-arabinoside	F10	0.92
Cyanidin 3-arabinoside	TNF	0.72
Feralolide	ALK	0.7
Feralolide	MAP2K1	0.7
Feralolide	MAP2K2	0.7
Feralolide	MAP2K6	0.7
Feralolide	MAP2K7	0.7
Feralolide	MAP2K2	0.7
Feralolide	SLC12A5	0.7
Feralolide	ESR1	0.71
Feralolide	PTK2	0.7
Feralolide	FLT1	0.7
Feralolide	HSP90AA1	0.7
Feralolide	MAPKAPK5	0.7
Feralolide	KIT	0.7
Feralolide	MAPK1	0.7
Feralolide	NOX4	0.7
Feralolide	PDGFRB	0.7
Feralolide	PDGFRB	0.7
Feralolide	ACVRL1	0.7
Feralolide	LCK	0.7
Feralolide	FLT3	0.7
Feralolide	FLT1	0.7
Feralolide	KDR	0.7
Gossypetin	ALOX12	0.91
Gossypetin	AKR1C3	0.7
Gossypetin	FASN	0.85
Gossypetin	ACHE	0.7
Gossypetin	ADORA1	0.77
Gossypetin	ADORA3	0.73
Gossypetin	ADORA2A	0.87
Gossypetin	AKR1B1	0.85
Gossypetin	GAA	0.7
Gossypetin	MAOA	0.7
Gossypetin	MAOA	0.73
Gossypetin	AR	0.73
Gossypetin	ALOX12	0.8
Gossypetin	ALOX15	0.8
Gossypetin	ALOX5	0.8
Gossypetin	CYP19A1	0.79
Gossypetin	AHR	0.89
Gossypetin	ABCG2	0.94
Gossypetin	AURKB	0.94
Gossypetin	NTRK2	0.82
Gossypetin	BACE1	0.7
Gossypetin	CA12	0.9
Gossypetin	CA2	0.9
Gossypetin	CA4	0.85
Gossypetin	CA7	0.9
Gossypetin	CBR1	0.76
Gossypetin	CSNK2A1	0.79
Gossypetin	CISD1	0.89
Gossypetin	PDE5A	0.76
Gossypetin	CDK1	0.94
Gossypetin	CDK2	0.74
Gossypetin	CDK5	0.91
Gossypetin	CDK6	0.91
Gossypetin	PTGS1	0.85
Gossypetin	CFTR	0.79
Gossypetin	CYP1A1	0.77
Gossypetin	CYP2C9	0.94
Gossypetin	OPRD1	0.7
Gossypetin	TOP1	0.85
Gossypetin	NT5E	0.94
Gossypetin	ELAVL3	0.94
Gossypetin	INHA	0.94
Gossypetin	EGFR	0.87
Gossypetin	HSD17B1	0.79
Gossypetin	HSD17B2	0.89
Gossypetin	ESR1	0.79
Gossypetin	GABRA1	0.7
Gossypetin	GSK3B	0.85
Gossypetin	GLO1	0.94
Gossypetin	HGF	0.94
Gossypetin	TNKS	0.79
Gossypetin	TNKS2	0.79
Gossypetin	IGF1R	0.94
Gossypetin	PSIP1	0.94
Gossypetin	ACP1	0.7
Gossypetin	DNPEP	0.94
Gossypetin	KIT	0.79
Gossypetin	MMP12	0.85
Gossypetin	MAOA	0.94
Gossypetin	OPRM1	0.8
Gossypetin	NOX4	0.94
Gossypetin	NR0B1	0.79
Gossypetin	OPRD1	0.7
Gossypetin	ABCB5	0.77
Gossypetin	ABCB1	0.7
Gossypetin	PIK3CG	0.94
Gossypetin	PDE5A	0.7
Gossypetin	PGF	0.7
Gossypetin	UBE3A	0.94
Gossypetin	PIM1	0.94
Gossypetin	NEU1	1
Gossypetin	SLC6A3	0.7
Gossypetin	SI	0.8
Gossypetin	SYN1	0.96
Gossypetin	TERT	0.7
Gossypetin	F10	0.86
Gossypetin	TTR	0.85
Gossypetin	TYR	0.91
Gossypetin	LCK	0.7
Gossypetin	FLT3	0.85
Gossypetin	AXL	0.94
Gossypetin	VEGFA	0.7
Gossypetin	KDR	0.87
Gossypetin	XDH	0.83
Herbacetin	ALOX12	0.86
Herbacetin	AKR1C3	0.73
Herbacetin	FASN	0.81
Herbacetin	ACHE	0.7
Herbacetin	ADORA1	0.7
Herbacetin	ADORA3	0.76
Herbacetin	ADORA2A	0.91
Herbacetin	AKR1B1	0.81
Herbacetin	GAA	0.73
Herbacetin	MAOA	0.73
Herbacetin	MAOB	0.7
Herbacetin	AR	0.7
Herbacetin	ALOX12	0.84
Herbacetin	ALOX15	0.84
Herbacetin	ALOX5	0.84
Herbacetin	CYP19A1	0.83
Herbacetin	AHR	0.94
Herbacetin	ABCG2	0.89
Herbacetin	AURKB	0.89
Herbacetin	NTRK2	0.86
Herbacetin	BACE1	0.7
Herbacetin	CA12	0.85
Herbacetin	CA2	0.85
Herbacetin	CA4	0.81
Herbacetin	CA7	0.85
Herbacetin	CBR1	0.8
Herbacetin	CES1	0.7
Herbacetin	CSNK2A1	0.83
Herbacetin	CISD1	0.94
Herbacetin	PDE5A	0.72
Herbacetin	CDK1	0.86
Herbacetin	CDK2	0.7
Herbacetin	CDK5	0.86
Herbacetin	CDK6	0.86
Herbacetin	PTGS1	0.81
Herbacetin	CFTR	0.83
Herbacetin	CYP1A1	0.7
Herbacetin	CYP1A1	0.7
Herbacetin	CYP2C9	0.7
Herbacetin	OPRD1	0.7
Herbacetin	TOP1	0.81
Herbacetin	NT5E	0.89
Herbacetin	ELAVL3	0.89
Herbacetin	INHA	0.89
Herbacetin	EGFR	0.83
Herbacetin	HSD17B1	0.83
Herbacetin	HSD17B2	0.94
Herbacetin	ESR1	0.83
Herbacetin	GABRA1	0.7
Herbacetin	GSK3B	0.81
Herbacetin	GLO1	0.89
Herbacetin	HGF	0.89
Herbacetin	TNKS	0.7
Herbacetin	TNKS2	0.7
Herbacetin	IGF1R	0.89
Herbacetin	PSIP1	0.89
Herbacetin	ACP1	0.7
Herbacetin	DNPEP	0.89
Herbacetin	KIT	0.83
Herbacetin	MMP12	0.81
Herbacetin	MAOA	0.89
Herbacetin	OPRM1	0.83
Herbacetin	NOX4	0.89
Herbacetin	NR0B1	0.83
Herbacetin	OPRD1	0.7
Herbacetin	ABCB5	0.81
Herbacetin	ABCB1	0.7
Herbacetin	PIK3CG	0.89
Herbacetin	PDE5A	0.71
Herbacetin	PGF	0.7
Herbacetin	UBE3A	0.89
Herbacetin	PIM1	0.89
Herbacetin	NEU1	0.95
Herbacetin	SLC6A3	0.7
Herbacetin	SI	0.84
Herbacetin	SYN1	0.9
Herbacetin	TERT	0.7
Herbacetin	F10	0.82
Herbacetin	TTR	0.81
Herbacetin	TYR	0.86
Herbacetin	LCK	0.7
Herbacetin	FLT3	0.81
Herbacetin	AXL	0.89
Herbacetin	VEGFA	0.7
Herbacetin	KDR	0.83
Herbacetin	XDH	0.87
Isorhamnetin	FASN	0.91
Isorhamnetin	ACHE	0.85
Isorhamnetin	ADORA1	0.7
Isorhamnetin	ADORA3	0.8
Isorhamnetin	ADORA2A	0.7
Isorhamnetin	AKR1B1	0.87
Isorhamnetin	GAA	0.94
Isorhamnetin	MAOA	0.7
Isorhamnetin	AR	0.81
Isorhamnetin	ALOX12	0.73
Isorhamnetin	ALOX15	0.77
Isorhamnetin	ALOX5	0.77
Isorhamnetin	CYP19A1	0.77
Isorhamnetin	AHR	0.79
Isorhamnetin	ABCG2	0.89
Isorhamnetin	AURKB	0.94
Isorhamnetin	NTRK2	0.94
Isorhamnetin	BACE1	0.73
Isorhamnetin	CA12	0.7
Isorhamnetin	CA2	1
Isorhamnetin	CA4	1
Isorhamnetin	CA7	0.85
Isorhamnetin	CBR1	1
Isorhamnetin	CSNK2A1	0.76
Isorhamnetin	CISD1	0.79
Isorhamnetin	PDE5A	0.89
Isorhamnetin	CDK1	0.77
Isorhamnetin	CDK2	0.91
Isorhamnetin	CDK5	0.74
Isorhamnetin	CDK6	0.91
Isorhamnetin	PTGS1	0.91
Isorhamnetin	PTGS1	0.85
Isorhamnetin	CFTR	0.71
Isorhamnetin	CYP1A1	0.79
Isorhamnetin	CYP2C9	0.71
Isorhamnetin	OPRD1	0.94
Isorhamnetin	TOP1	0.7
Isorhamnetin	SLC6A3	0.85
Isorhamnetin	NT5E	0.71
Isorhamnetin	ELAVL3	0.94
Isorhamnetin	INHA	0.94
Isorhamnetin	EGFR	0.94
Isorhamnetin	HSD17B1	0.86
Isorhamnetin	HSD17B2	0.79
Isorhamnetin	ESR1	0.89
Isorhamnetin	GABRA1	0.79
Isorhamnetin	GSTO1	0.7
Isorhamnetin	GSK3B	0.7
Isorhamnetin	GLO1	0.85
Isorhamnetin	HGF	0.94
Isorhamnetin	TNKS	0.94
Isorhamnetin	TNKS2	0.79
Isorhamnetin	IGF1R	0.92
Isorhamnetin	PSIP1	0.94
Isorhamnetin	DNPEP	0.94
Isorhamnetin	KIT	0.94
Isorhamnetin	MMP12	0.79
Isorhamnetin	MAOA	0.85
Isorhamnetin	OPRM1	0.94
Isorhamnetin	NOX4	0.76
Isorhamnetin	NR0B1	0.94
Isorhamnetin	OPRD1	0.8
Isorhamnetin	ABCB5	0.7
Isorhamnetin	ABCB1	0.78
Isorhamnetin	PIK3CG	0.7
Isorhamnetin	PDE5A	0.94
Isorhamnetin	PGF	0.73
Isorhamnetin	UBE3A	0.7
Isorhamnetin	PIM1	0.94
Isorhamnetin	NEU1	0.94
Isorhamnetin	SLC6A3	0.9
Isorhamnetin	SI	0.7
Isorhamnetin	SYN1	0.77
Isorhamnetin	TERT	0.92
Isorhamnetin	F10	0.82
Isorhamnetin	TTR	0.85
Isorhamnetin	TYR	0.85
Isorhamnetin	ABL1	0.82
Isorhamnetin	LCK	0.7
Isorhamnetin	FLT3	0.7
Isorhamnetin	AXL	0.85
Isorhamnetin	VEGFA	0.94
Isorhamnetin	TEK	0.7
Isorhamnetin	XDH	0.7
Isorhamnetin	XDH	0.83
Isorhamnetin	ALOX12	0.85
Kaempferol 8-C-sulfate	ADORA1	0.7
Kaempferol 8-C-sulfate	ADORA3	0.7
Kaempferol 8-C-sulfate	ADORA2A	0.7
Kaempferol 8-C-sulfate	AHR	0.7
Kaempferol 8-C-sulfate	CA12	0.7
Kaempferol 8-C-sulfate	CA4	0.7
Kaempferol 8-C-sulfate	CA7	0.7
Kaempferol 8-C-sulfate	CISD1	0.7
Kaempferol 8-C-sulfate	CYP1A1	0.7
Kaempferol 8-C-sulfate	CYP1A1	0.7
Kaempferol 8-C-sulfate	CYP2C9	0.7
Kaempferol 8-C-sulfate	EGFR	0.7
Kaempferol 8-C-sulfate	HSD17B2	0.7
Kaempferol 8-C-sulfate	TYR	0.7
Kaempferol 8-C-sulfate	LCK	0.7
Kaempferol-7-Glucoside	ADORA1	0.7
Kaempferol-7-Glucoside	ADORA3	0.7
Kaempferol-7-Glucoside	ALDH2	0.71
Kaempferol-7-Glucoside	AKR1B1	0.76
Kaempferol-7-Glucoside	AKR1B1	0.78
Kaempferol-7-Glucoside	ADRA2A	0.78
Kaempferol-7-Glucoside	ALOX5	0.7
Kaempferol-7-Glucoside	CA12	0.71
Kaempferol-7-Glucoside	CA2	0.79
Kaempferol-7-Glucoside	CA4	0.71
Kaempferol-7-Glucoside	CA7	0.71
Kaempferol-7-Glucoside	PDE5A	0.73
Kaempferol-7-Glucoside	CHRM5	0.76
Kaempferol-7-Glucoside	CYP3A	0.7
Kaempferol-7-Glucoside	EGFR	0.74
Kaempferol-7-Glucoside	IL2RA	0.71
Kaempferol-7-Glucoside	ALPI	0.74
Kaempferol-7-Glucoside	NOX4	0.78
Kaempferol-7-Glucoside	HPA	0.76
Kaempferol-7-Glucoside	PTPN1	0.8
Kaempferol-7-Glucoside	RPS6KA3	0.7
Kaempferol-7-Glucoside	F10	0.8
Kaempferol-7-Glucoside	TNF	0.91
Luteolin-7-Mono-Beta-D-Glucoside	ACHE	0.7
Luteolin-7-Mono-Beta-D-Glucoside	ALDH2	0.74
Luteolin-7-Mono-Beta-D-Glucoside	AKR1B1	0.72
Luteolin-7-Mono-Beta-D-Glucoside	ADRA2A	0.76
Luteolin-7-Mono-Beta-D-Glucoside	ALOX5	0.7
Luteolin-7-Mono-Beta-D-Glucoside	CA1	0.7
Luteolin-7-Mono-Beta-D-Glucoside	CA12	0.7
Luteolin-7-Mono-Beta-D-Glucoside	CA2	0.75
Luteolin-7-Mono-Beta-D-Glucoside	CA4	0.7
Luteolin-7-Mono-Beta-D-Glucoside	CA7	0.7
Luteolin-7-Mono-Beta-D-Glucoside	CA9	0.7
Luteolin-7-Mono-Beta-D-Glucoside	PDE5A	0.7
Luteolin-7-Mono-Beta-D-Glucoside	CHRM5	0.75
Luteolin-7-Mono-Beta-D-Glucoside	CYP3A	0.7
Luteolin-7-Mono-Beta-D-Glucoside	SLC6A3	0.7
Luteolin-7-Mono-Beta-D-Glucoside	EGFR	0.77
Luteolin-7-Mono-Beta-D-Glucoside	IL2RA	0.74
Luteolin-7-Mono-Beta-D-Glucoside	ALPI	0.73
Luteolin-7-Mono-Beta-D-Glucoside	NOX4	0.76
Luteolin-7-Mono-Beta-D-Glucoside	HPA	0.74
Luteolin-7-Mono-Beta-D-Glucoside	PTPN1	0.78
Luteolin-7-Mono-Beta-D-Glucoside	RPS6KA3	0.7
Luteolin-7-Mono-Beta-D-Glucoside	F10	0.77
Luteolin-7-Mono-Beta-D-Glucoside	TNF	1
Myrtillin	AKR1B1	0.87
Myrtillin	ADRA2A	0.89
Myrtillin	CA12	0.76
Myrtillin	CA2	0.87
Myrtillin	CA4	0.76
Myrtillin	CA7	0.76
Myrtillin	CA9	0.7
Myrtillin	PDE5A	0.77
Myrtillin	CHRM5	0.87
Myrtillin	CYP3A	0.78
Myrtillin	IL2RA	0.75
Myrtillin	ALPI	0.84
Myrtillin	NOX4	0.89
Myrtillin	HPA	0.85
Myrtillin	PTPN1	0.9
Myrtillin	RPS6KA3	0.75
Myrtillin	F10	0.94
Myrtillin	TNF	0.75
Neoandrographolide	F7	0.7
Neoandrographolide	KLF5	0.77
Neoandrographolide	ATP1A1	0.75
Neoandrographolide	ATP1A2	0.75
Neoandrographolide	RORC	0.75
Neoandrographolide	PTGS1	0.7
Neoandrographolide	PPP2R5A	0.7
Neoandrographolide	PTPN1	0.7
Neoandrographolide	PTPRA	0.7
Neoandrographolide	ATP1A2	0.7
Neoandrographolide	SLCO1B1	0.7
Neoandrographolide	STAT3	0.75
Neoandrographolide	TTL	0.7
Neoandrographolide	XDH	0.7
Paniculide-B	PTGS1	0.7
Paniculide-B	DDIT3	0.7
Paniculide-B	IARS	0.7
Paniculide-B	NDUFA9	0.7
Paniculide-B	CHRNB2	0.73
Paniculide-B	PRKCB	0.7
Paniculide-B	PRKCA	0.71
Paniculide-B	FNTA	0.7
Paniculide-B	PRKCA	0.7
Paniculide-B	PRKCD	0.7
Paniculide-B	PRKCQ	0.7
Paniculide-B	PRKCA	0.7
Paniculide-B	PRKCE	0.7
Paniculide-B	PRKCH	0.7
Paniculide-B	PRKCG	0.7
Paniculide-B	F2RL1	0.7
Paniculide-B	ATP2A2	0.73
Paniculide-B	ATP2A1	0.7
Paniculide-B	SCN2A	0.73
Paniculide-B	PCSK7	0.7
Paniculide-B	TTL	0.7
Pelargonidin 5-galactoside	ALDH2	0.7
Pelargonidin 5-galactoside	AKR1B1	0.71
Pelargonidin 5-galactoside	ADRA2A	0.73
Pelargonidin 5-galactoside	CA1	0.7
Pelargonidin 5-galactoside	CA12	0.7
Pelargonidin 5-galactoside	CA2	0.7
Pelargonidin 5-galactoside	CA4	0.74
Pelargonidin 5-galactoside	CA7	0.74
Pelargonidin 5-galactoside	CA9	0.7
Pelargonidin 5-galactoside	CHRM5	0.71
Pelargonidin 5-galactoside	EGFR	0.7
Pelargonidin 5-galactoside	IL2RA	0.7
Pelargonidin 5-galactoside	ALPI	0.7
Pelargonidin 5-galactoside	NOX4	0.73
Pelargonidin 5-galactoside	HPA	0.7
Pelargonidin 5-galactoside	PTPN1	0.74
Pelargonidin 5-galactoside	RPS6KA3	0.71
Pelargonidin 5-galactoside	F10	0.87
Pelargonidin 5-galactoside	TNF	0.81
Peonidin galactoside	AKR1B1	0.85
Peonidin galactoside	ADRA2A	0.88
Peonidin galactoside	CA12	0.75
Peonidin galactoside	CA2	0.86
Peonidin galactoside	CA4	0.75
Peonidin galactoside	CA7	0.75
Peonidin galactoside	CA9	0.7
Peonidin galactoside	PDE5A	0.76
Peonidin galactoside	CHRM5	0.86
Peonidin galactoside	CYP3A	0.77
Peonidin galactoside	IL2RA	0.73
Peonidin galactoside	ALPI	0.82
Peonidin galactoside	NOX4	0.88
Peonidin galactoside	HPA	0.84
Peonidin galactoside	PTPN1	0.88
Peonidin galactoside	RPS6KA3	0.74
Peonidin galactoside	F10	0.93
Peonidin galactoside	TNF	0.73
Petunidin 3-glucoside	AKR1B1	0.85
Petunidin 3-glucoside	ADRA2A	0.87
Petunidin 3-glucoside	CA12	0.76
Petunidin 3-glucoside	CA2	0.86
Petunidin 3-glucoside	CA4	0.76
Petunidin 3-glucoside	CA7	0.76
Petunidin 3-glucoside	CA9	0.7
Petunidin 3-glucoside	PDE5A	0.76
Petunidin 3-glucoside	CHRM5	0.86
Petunidin 3-glucoside	CYP3A	0.77
Petunidin 3-glucoside	IL2RA	0.74
Petunidin 3-glucoside	ALPI	0.83
Petunidin 3-glucoside	NOX4	0.87
Petunidin 3-glucoside	HPA	0.83
Petunidin 3-glucoside	PTPN1	0.88
Petunidin 3-glucoside	RPS6KA3	0.75
Petunidin 3-glucoside	F10	0.94
Petunidin 3-glucoside	TNF	0.74
Pinnatin	AKR1C3	0.7
Pinnatin	FASN	0.7
Pinnatin	ACHE	0.73
Pinnatin	ADORA1	0.7
Pinnatin	ADORA3	0.71
Pinnatin	ADORA2A	0.73
Pinnatin	ADRB2	0.73
Pinnatin	AKR1B1	0.7
Pinnatin	AKR1B1	0.7
Pinnatin	AKR1B1	0.7
Pinnatin	GAA	0.7
Pinnatin	MAOA	0.72
Pinnatin	MAOB	0.7
Pinnatin	AR	0.7
Pinnatin	ALOX12	0.7
Pinnatin	ALOX15	0.78
Pinnatin	ALOX15	0.78
Pinnatin	ALOX5	0.78
Pinnatin	CYP19A1	0.78
Pinnatin	AHR	0.76
Pinnatin	ABCG2	0.71
Pinnatin	AURKB	0.7
Pinnatin	NTRK2	0.7
Pinnatin	APP	0.71
Pinnatin	CA12	0.7
Pinnatin	CA2	0.7
Pinnatin	CA4	0.7
Pinnatin	CA7	0.73
Pinnatin	CBR1	0.7
Pinnatin	CES1	0.79
Pinnatin	CSNK2A1	0.7
Pinnatin	CISD1	0.76
Pinnatin	BCHE	0.71
Pinnatin	CDK1	0.7
Pinnatin	CDK5	0.7
Pinnatin	CDK6	0.7
Pinnatin	PTGS1	0.7
Pinnatin	CFTR	0.73
Pinnatin	CYP1A1	0.71
Pinnatin	CYP2C9	0.71
Pinnatin	TOP1	0.7
Pinnatin	DRD2	0.73
Pinnatin	NT5E	0.7
Pinnatin	ELAVL3	0.7
Pinnatin	INHA	0.7
Pinnatin	EGFR	0.7
Pinnatin	HSD17B1	0.7
Pinnatin	HSD17B2	0.76
Pinnatin	ESR1	0.71
Pinnatin	GSK3B	0.76
Pinnatin	GLO1	0.73
Pinnatin	HGF	0.7
Pinnatin	TNKS	0.7
Pinnatin	TNKS2	0.71
Pinnatin	IGF1R	0.7
Pinnatin	PSIP1	0.7
Pinnatin	DNPEP	0.7
Pinnatin	KIT	0.7
Pinnatin	MMP12	0.76
Pinnatin	MAOA	0.73
Pinnatin	OPRM1	0.7
Pinnatin	MSH3	0.71
Pinnatin	NOX4	0.7
Pinnatin	NR0B1	0.7
Pinnatin	ABCB1	0.76
Pinnatin	PPARG	0.73
Pinnatin	PIK3CG	0.7
Pinnatin	UBE3A	0.7
Pinnatin	PIM1	0.7
Pinnatin	SYN1	0.7
Pinnatin	SI	0.72
Pinnatin	TERT	0.78
Pinnatin	F10	0.7
Pinnatin	TTR	0.7
Pinnatin	TYR	0.73
Pinnatin	LCK	0.7
Pinnatin	FLT3	0.7
Pinnatin	AXL	0.73
Pinnatin	XDH	0.7
Pinnatin	AKR1B1	0.73
Pongamone A	ACHE	0.7
Pongamone A	ALDH2	0.77
Pongamone A	ALOX5	0.7
Pongamone A	CYP19A1	0.7
Pongamone A	CA12	0.7
Pongamone A	CA7	0.7
Pongamone A	BCHE	0.7
Pongamone A	DRD5	0.7
Pongamone A	EGFR	0.7
Pongamone A	MIF	0.7
Pongamone A	ABCB1	0.8
Pongamone A	S1PR1	0.7
Pongamone A	AKR1B1	0.7
Pongamone A	PKIA	0.72
Tiliroside	AKR1B1	0.76
Tiliroside	ADRA2A	0.78
Tiliroside	CA12	0.78
Tiliroside	CA2	0.97
Tiliroside	CA4	0.78
Tiliroside	CA7	0.97
Tiliroside	PDE5A	0.97
Tiliroside	CHRM5	0.79
Tiliroside	CYP3A	0.79
Tiliroside	IL2RA	0.9
Tiliroside	ALPI	0.7
Tiliroside	NOX4	0.77
Tiliroside	HPA	0.78
Tiliroside	PTPN1	0.84
Tiliroside	RPS6KA3	0.87
Tiliroside	F10	0.75
Tiliroside	TNF	0.77
Tiliroside	MDH1	0.7
Andrographiside	ATP5F1B	0.7
Andrographiside	NR1H4	0.7
Andrographiside	CHS1	0.7
Andrographiside	F7	0.7
Andrographiside	ITGA4	0.7
Andrographiside	IARS1	0.7
Andrographiside	KLF5	0.7
Andrographiside	MRP1	0.7
Andrographiside	ATP1A1	0.7
Andrographiside	ATP1A2	0.7
Andrographiside	ATP1A1	0.7
Andrographiside	RORC	0.7
Andrographiside	ABCB1	0.7
Andrographiside	PRKCB	0.7
Andrographiside	PRKCA	0.7
Andrographiside	PTGS1	0.7
Andrographiside	PRKCA	0.7
Andrographiside	PRKCD	0.7
Andrographiside	PRKCT	0.7
Andrographiside	PRKCE	0.7
Andrographiside	PRKCH	0.7
Andrographiside	PRKCG	0.7
Andrographiside	PRKC	0.7
Andrographiside	PP2CB	0.7
Andrographiside	PTPN1	0.7
Andrographiside	ATP2A2	0.7
Andrographiside	PTPA	0.7
Andrographiside	PPP2R5D	0.7
Andrographiside	PPP2CA	0.7
Andrographiside	PPP1CC	0.7
Andrographiside	ATP1A2	0.7
Andrographiside	SLCO1A4	0.7
Andrographiside	SLCO1B1	0.7
Andrographiside	STAT3	0.7
Andrographiside	XDH	0.7
Altisin	ALOX12	0.7
Altisin	AKR1C3	0.7
Altisin	FASN	0.7
Altisin	ACHE	0.7
Altisin	ADORA1	0.82
Altisin	ADORA3	0.78
Altisin	ADORA2A	0.75
Altisin	AKR1B1	0.86
Altisin	ALR2	0.7
Altisin	AKR1B1	0.71
Altisin	GAA	0.72
Altisin	MAOA	0.75
Altisin	MAOB	0.71
Altisin	ALOX12	0.72
Altisin	ALOX15	0.72
Altisin	ALOX15	0.72
Altisin	ALOX5	0.72
Altisin	AHR	0.74
Altisin	ABCG2	0.71
Altisin	AURKB	0.71
Altisin	NTRK2	0.76
Altisin	BCHE	0.71
Altisin	CA12	0.72
Altisin	CA2	0.72
Altisin	CA4	0.7
Altisin	CA7	0.72
Altisin	CBR1	0.7
Altisin	CSNK2A1	0.7
Altisin	CISD1	0.74
Altisin	BCHE	0.7
Altisin	CDK1	0.71
Altisin	CDK1	0.7
Altisin	CDK5	0.7
Altisin	CDK6	0.7
Altisin	PTGS1	0.7
Altisin	CFTR	0.7
Altisin	CYP19A1	0.7
Altisin	CYP1A1	0.7
Altisin	CYP1A1	0.74
Altisin	CYP2C9	0.72
Altisin	gyrB	0.7
Altisin	TOP1	0.7
Altisin	D2R	0.7
Altisin	Nt5e	0.71
Altisin	ELAVL3	0.71
Altisin	INHA	0.71
Altisin	EGFR	0.7
Altisin	HSD17B1	0.7
Altisin	HSD17B2	0.74
Altisin	ESR	0.7
Altisin	GSK3B	0.7
Altisin	GLO1	0.71
Altisin	HGF	0.71
Altisin	GAG-POL	0.72
Altisin	IGF1R	0.71
Altisin	PSIP1	0.71
Altisin	DNPEP	0.71
Altisin	KIT	0.73
Altisin	MMP12	0.7
Altisin	MAOA	0.71
Altisin	OPRM1	0.87
Altisin	NOX4	0.71
Altisin	NR0B1	0.74
Altisin	ABCB1	0.73
Altisin	PIK3CG	0.71
Altisin	E6AP	0.71
Altisin	NEU1	0.75
Altisin	SIGMAR1	0.7
Altisin	SI	0.72
Altisin	SYN1	0.72
Altisin	TERT	0.74
Altisin	F10	0.7
Altisin	TTR	0.7
Altisin	TYR	0.74
Altisin	LCK	0.7
Altisin	FLT3	0.7
Altisin	UFO	0.71
Altisin	XDH	0.8
Altisin	XDH	0.7
2'-hydroxy-5,7,8- trimethoxyflavone	ALOX12	0.7
2'-hydroxy-5,7,8- trimethoxyflavone	AKR1C3	0.7
2'-hydroxy-5,7,8- trimethoxyflavone	FASN	0.7
2'-hydroxy-5,7,8- trimethoxyflavone	ACHE	0.7
2'-hydroxy-5,7,8- trimethoxyflavone	ADORA1	0.83
2'-hydroxy-5,7,8- trimethoxyflavone	ADORA3	0.77
2'-hydroxy-5,7,8- trimethoxyflavone	ADORA2A	0.76
2'-hydroxy-5,7,8- trimethoxyflavone	AKR1B1	0.87
2'-hydroxy-5,7,8- trimethoxyflavone	ALR2	0.73
2'-hydroxy-5,7,8- trimethoxyflavone	AKR1B1	0.72
2'-hydroxy-5,7,8- trimethoxyflavone	GAA	0.7
2'-hydroxy-5,7,8- trimethoxyflavone	MAOA	0.76
2'-hydroxy-5,7,8- trimethoxyflavone	MAOB	0.72
2'-hydroxy-5,7,8- trimethoxyflavone	DHTR	0.7
2'-hydroxy-5,7,8- trimethoxyflavone	ALOX12	0.73
2'-hydroxy-5,7,8- trimethoxyflavone	ALOX15	0.73
2'-hydroxy-5,7,8- trimethoxyflavone	ALOX15	0.73
2'-hydroxy-5,7,8- trimethoxyflavone	ALOX5	0.73
2'-hydroxy-5,7,8- trimethoxyflavone	AHR	0.75
2'-hydroxy-5,7,8- trimethoxyflavone	ABCG2	0.72
2'-hydroxy-5,7,8- trimethoxyflavone	AURKB	0.72
2'-hydroxy-5,7,8- trimethoxyflavone	NTRK2	0.77
2'-hydroxy-5,7,8- trimethoxyflavone	CA12	0.73
2'-hydroxy-5,7,8- trimethoxyflavone	CA2	0.73
2'-hydroxy-5,7,8- trimethoxyflavone	CA4	0.7
2'-hydroxy-5,7,8- trimethoxyflavone	CA7	0.73
2'-hydroxy-5,7,8- trimethoxyflavone	CBR1	0.71
2'-hydroxy-5,7,8- trimethoxyflavone	CSNK2A1	0.71
2'-hydroxy-5,7,8- trimethoxyflavone	CISD1	0.75
2'-hydroxy-5,7,8- trimethoxyflavone	BCHE	0.7
2'-hydroxy-5,7,8- trimethoxyflavone	CDK1	0.72
2'-hydroxy-5,7,8- trimethoxyflavone	CDK1	0.7
2'-hydroxy-5,7,8- trimethoxyflavone	CDK5	0.7
2'-hydroxy-5,7,8- trimethoxyflavone	CDK6	0.7
2'-hydroxy-5,7,8- trimethoxyflavone	PTGS1	0.7
2'-hydroxy-5,7,8- trimethoxyflavone	CFTR	0.71
2'-hydroxy-5,7,8- trimethoxyflavone	CYP19A1	0.71
2'-hydroxy-5,7,8- trimethoxyflavone	CYP1A1	0.71
2'-hydroxy-5,7,8- trimethoxyflavone	CYP1A1	0.74
2'-hydroxy-5,7,8- trimethoxyflavone	CYP2C9	0.73
2'-hydroxy-5,7,8- trimethoxyflavone	gyrB	0.7
2'-hydroxy-5,7,8- trimethoxyflavone	TOP1	0.7
2'-hydroxy-5,7,8- trimethoxyflavone	D2R	0.7
2'-hydroxy-5,7,8- trimethoxyflavone	Nt5e	0.72
2'-hydroxy-5,7,8- trimethoxyflavone	ELAVL3	0.72
2'-hydroxy-5,7,8- trimethoxyflavone	INHA	0.72
2'-hydroxy-5,7,8- trimethoxyflavone	EGFR	0.7
2'-hydroxy-5,7,8- trimethoxyflavone	HSD17B1	0.71
2'-hydroxy-5,7,8- trimethoxyflavone	HSD17B2	0.75
2'-hydroxy-5,7,8- trimethoxyflavone	ESR	0.71
2'-hydroxy-5,7,8- trimethoxyflavone	GSK3B	0.7
2'-hydroxy-5,7,8- trimethoxyflavone	GLO1	0.72
2'-hydroxy-5,7,8- trimethoxyflavone	HGF	0.72
2'-hydroxy-5,7,8- trimethoxyflavone	GAG-POL	0.73
2'-hydroxy-5,7,8- trimethoxyflavone	IGF1R	0.72
2'-hydroxy-5,7,8- trimethoxyflavone	PSIP1	0.72
2'-hydroxy-5,7,8- trimethoxyflavone	DNPEP	0.72
2'-hydroxy-5,7,8- trimethoxyflavone	KIT	0.74
2'-hydroxy-5,7,8- trimethoxyflavone	MMP12	0.7
2'-hydroxy-5,7,8- trimethoxyflavone	MAOA	0.72
2'-hydroxy-5,7,8- trimethoxyflavone	OPRM1	0.88
2'-hydroxy-5,7,8- trimethoxyflavone	NOX4	0.72
2'-hydroxy-5,7,8- trimethoxyflavone	NR0B1	0.75
2'-hydroxy-5,7,8- trimethoxyflavone	ABCB5	0.7
2'-hydroxy-5,7,8- trimethoxyflavone	ABCB1	0.75
2'-hydroxy-5,7,8- trimethoxyflavone	PIK3CG	0.72
2'-hydroxy-5,7,8- trimethoxyflavone	PDE5A	0.7
2'-hydroxy-5,7,8- trimethoxyflavone	E6AP	0.72
2'-hydroxy-5,7,8- trimethoxyflavone	NEU1	0.76
2'-hydroxy-5,7,8- trimethoxyflavone	SIGMAR1	0.7
2'-hydroxy-5,7,8- trimethoxyflavone	SI	0.73
2'-hydroxy-5,7,8- trimethoxyflavone	SYN1	0.73
2'-hydroxy-5,7,8- trimethoxyflavone	TERT	0.75
2'-hydroxy-5,7,8- trimethoxyflavone	F10	0.7
2'-hydroxy-5,7,8- trimethoxyflavone	TTR	0.71
2'-hydroxy-5,7,8- trimethoxyflavone	TYR	0.75
2'-hydroxy-5,7,8- trimethoxyflavone	LCK	0.7
2'-hydroxy-5,7,8- trimethoxyflavone	FLT3	0.7
2'-hydroxy-5,7,8- trimethoxyflavone	UFO	0.72
2'-hydroxy-5,7,8- trimethoxyflavone	XDH	0.78
2'-hydroxy-5,7,8- trimethoxyflavone	XDH	0.7
5-hydroxy-7,8,2',3',4'- pentamethoxyflavone	ALOX12	0.72
5-hydroxy-7,8,2',3',4'- pentamethoxyflavone	FASN	0.73
5-hydroxy-7,8,2',3',4'- pentamethoxyflavone	ACHE	0.7
5-hydroxy-7,8,2',3',4'- pentamethoxyflavone	ADORA1	0.76
5-hydroxy-7,8,2',3',4'- pentamethoxyflavone	ADORA3	0.72
5-hydroxy-7,8,2',3',4'- pentamethoxyflavone	ADORA2A	0.7
5-hydroxy-7,8,2',3',4'- pentamethoxyflavone	AKR1B1	0.89
5-hydroxy-7,8,2',3',4'- pentamethoxyflavone	ALR2	0.7
5-hydroxy-7,8,2',3',4'- pentamethoxyflavone	AKR1B1	0.75
5-hydroxy-7,8,2',3',4'- pentamethoxyflavone	GAA	0.7
5-hydroxy-7,8,2',3',4'- pentamethoxyflavone	MAOA	0.7
5-hydroxy-7,8,2',3',4'- pentamethoxyflavone	MAOB	0.7
5-hydroxy-7,8,2',3',4'- pentamethoxyflavone	ALOX12	0.7
5-hydroxy-7,8,2',3',4'- pentamethoxyflavone	ALOX15	0.7
5-hydroxy-7,8,2',3',4'- pentamethoxyflavone	ALOX15	0.7
5-hydroxy-7,8,2',3',4'- pentamethoxyflavone	ALOX5	0.7
5-hydroxy-7,8,2',3',4'- pentamethoxyflavone	AHR	0.71
5-hydroxy-7,8,2',3',4'- pentamethoxyflavone	ABCG2	0.75
5-hydroxy-7,8,2',3',4'- pentamethoxyflavone	AURKB	0.75
5-hydroxy-7,8,2',3',4'- pentamethoxyflavone	NTRK2	0.7
5-hydroxy-7,8,2',3',4'- pentamethoxyflavone	CA12	0.79
5-hydroxy-7,8,2',3',4'- pentamethoxyflavone	CA2	0.79
5-hydroxy-7,8,2',3',4'- pentamethoxyflavone	CA4	0.73
5-hydroxy-7,8,2',3',4'- pentamethoxyflavone	CA7	0.79
5-hydroxy-7,8,2',3',4'- pentamethoxyflavone	CISD1	0.71
5-hydroxy-7,8,2',3',4'- pentamethoxyflavone	BCHE	0.7
5-hydroxy-7,8,2',3',4'- pentamethoxyflavone	CDK1	0.75
5-hydroxy-7,8,2',3',4'- pentamethoxyflavone	CDK1	0.72
5-hydroxy-7,8,2',3',4'- pentamethoxyflavone	CDK5	0.72
5-hydroxy-7,8,2',3',4'- pentamethoxyflavone	CDK6	0.72
5-hydroxy-7,8,2',3',4'- pentamethoxyflavone	PTGS1	0.73
5-hydroxy-7,8,2',3',4'- pentamethoxyflavone	CYP19A1	0.75
5-hydroxy-7,8,2',3',4'- pentamethoxyflavone	CYP1A1	0.77
5-hydroxy-7,8,2',3',4'- pentamethoxyflavone	CYP1A1	0.7
5-hydroxy-7,8,2',3',4'- pentamethoxyflavone	CYP2C9	0.79
5-hydroxy-7,8,2',3',4'- pentamethoxyflavone	gyrB	0.7
5-hydroxy-7,8,2',3',4'- pentamethoxyflavone	TOP1	0.73
5-hydroxy-7,8,2',3',4'- pentamethoxyflavone	Nt5e	0.75
5-hydroxy-7,8,2',3',4'- pentamethoxyflavone	ELAVL3	0.75
5-hydroxy-7,8,2',3',4'- pentamethoxyflavone	INHA	0.75
5-hydroxy-7,8,2',3',4'- pentamethoxyflavone	EGFR	0.7
5-hydroxy-7,8,2',3',4'- pentamethoxyflavone	HSD17B2	0.71
5-hydroxy-7,8,2',3',4'- pentamethoxyflavone	GSK3B	0.73
5-hydroxy-7,8,2',3',4'- pentamethoxyflavone	GLO1	0.75
5-hydroxy-7,8,2',3',4'- pentamethoxyflavone	HGF	0.75
5-hydroxy-7,8,2',3',4'- pentamethoxyflavone	GAG-POL	0.76
5-hydroxy-7,8,2',3',4'- pentamethoxyflavone	IGF1R	0.75
5-hydroxy-7,8,2',3',4'- pentamethoxyflavone	PSIP1	0.75
5-hydroxy-7,8,2',3',4'- pentamethoxyflavone	DNPEP	0.75
5-hydroxy-7,8,2',3',4'- pentamethoxyflavone	KIT	0.72
5-hydroxy-7,8,2',3',4'- pentamethoxyflavone	MMP12	0.73
5-hydroxy-7,8,2',3',4'- pentamethoxyflavone	MAOA	0.75
5-hydroxy-7,8,2',3',4'- pentamethoxyflavone	OPRM1	0.83
5-hydroxy-7,8,2',3',4'- pentamethoxyflavone	NOX4	0.75
5-hydroxy-7,8,2',3',4'- pentamethoxyflavone	NR0B1	0.71
5-hydroxy-7,8,2',3',4'- pentamethoxyflavone	ABCB1	0.7
5-hydroxy-7,8,2',3',4'- pentamethoxyflavone	PIK3CG	0.75
5-hydroxy-7,8,2',3',4'- pentamethoxyflavone	E6AP	0.75
5-hydroxy-7,8,2',3',4'- pentamethoxyflavone	NEU1	0.79
5-hydroxy-7,8,2',3',4'- pentamethoxyflavone	SI	0.7
5-hydroxy-7,8,2',3',4'- pentamethoxyflavone	SYN1	0.76
5-hydroxy-7,8,2',3',4'- pentamethoxyflavone	TERT	0.77
5-hydroxy-7,8,2',3',4'- pentamethoxyflavone	F10	0.7
5-hydroxy-7,8,2',3',4'- pentamethoxyflavone	TTR	0.73
5-hydroxy-7,8,2',3',4'- pentamethoxyflavone	TYR	0.77
5-hydroxy-7,8,2',3',4'- pentamethoxyflavone	LCK	0.78
5-hydroxy-7,8,2',3',4'- pentamethoxyflavone	FLT3	0.73
5-hydroxy-7,8,2',3',4'- pentamethoxyflavone	UFO	0.75
5-hydroxy-7,8,2',3',4'- pentamethoxyflavone	XDH	0.77
5-hydroxy-7,8,2',3',4'- pentamethoxyflavone	XDH	0.73
Wightin	ALOX12	0.72
Wightin	AKR1C3	0.7
Wightin	FASN	0.73
Wightin	ACHE	0.7
Wightin	ADORA1	0.78
Wightin	ADORA3	0.75
Wightin	ADORA2A	0.73
Wightin	AKR1B1	0.9
Wightin	ALR2	0.7
Wightin	AKR1B1	0.75
Wightin	GAA	0.7
Wightin	MAOA	0.73
Wightin	MAOB	0.7
Wightin	ALOX12	0.7
Wightin	ALOX15	0.7
Wightin	ALOX15	0.7
Wightin	ALOX5	0.7
Wightin	AHR	0.71
Wightin	ABCG2	0.75
Wightin	AURKB	0.75
Wightin	NTRK2	0.73
Wightin	CA12	0.76
Wightin	CA2	0.76
Wightin	CA4	0.73
Wightin	CA7	0.76
Wightin	CBR1	0.7
Wightin	CSNK2A1	0.7
Wightin	CISD1	0.71
Wightin	BCHE	0.7
Wightin	CDK1	0.75
Wightin	CDK1	0.72
Wightin	CDK5	0.72
Wightin	CDK6	0.72
Wightin	PTGS1	0.73
Wightin	CFTR	0.7
Wightin	CYP19A1	0.7
Wightin	CYP1A1	0.74
Wightin	CYP1A1	0.71
Wightin	CYP2C9	0.76
Wightin	gyrB	0.7
Wightin	TOP1	0.73
Wightin	Nt5e	0.75
Wightin	ELAVL3	0.75
Wightin	INHA	0.75
Wightin	EGFR	0.7
Wightin	HSD17B1	0.7
Wightin	HSD17B2	0.71
Wightin	ESR	0.7
Wightin	GSK3B	0.73
Wightin	GLO1	0.75
Wightin	HGF	0.75
Wightin	GAG-POL	0.76
Wightin	IGF1R	0.75
Wightin	PSIP1	0.75
Wightin	DNPEP	0.75
Wightin	KIT	0.71
Wightin	MMP12	0.73
Wightin	MAOA	0.75
Wightin	OPRM1	0.83
Wightin	NOX4	0.75
Wightin	NR0B1	0.71
Wightin	ABCB1	0.7
Wightin	PIK3CG	0.75
Wightin	E6AP	0.75
Wightin	NEU1	0.79
Wightin	SI	0.7
Wightin	SYN1	0.76
Wightin	TERT	0.78
Wightin	F10	0.7
Wightin	TTR	0.7
Wightin	TYR	0.78
Wightin	LCK	0.7
Wightin	FLT3	0.73
Wightin	UFO	0.75
Wightin	XDH	0.77
Wightin	XDH	0.73
5-hydroxy-7,8-dimethoxyflavanone	AKR1C3	0.72
5-hydroxy-7,8-dimethoxyflavanone	FABG	0.7
5-hydroxy-7,8-dimethoxyflavanone	FASN	0.7
5-hydroxy-7,8-dimethoxyflavanone	PGD	0.7
5-hydroxy-7,8-dimethoxyflavanone	ACHE	0.79
5-hydroxy-7,8-dimethoxyflavanone	ALPL	0.7
5-hydroxy-7,8-dimethoxyflavanone	FUT7	0.7
5-hydroxy-7,8-dimethoxyflavanone	MAOB	0.7
5-hydroxy-7,8-dimethoxyflavanone	ARG1	0.7
5-hydroxy-7,8-dimethoxyflavanone	APP	0.7
5-hydroxy-7,8-dimethoxyflavanone	BACE1	0.7
5-hydroxy-7,8-dimethoxyflavanone	CA1	0.81
5-hydroxy-7,8-dimethoxyflavanone	CA12	0.7
5-hydroxy-7,8-dimethoxyflavanone	CA2	0.81
5-hydroxy-7,8-dimethoxyflavanone	CA4	0.84
5-hydroxy-7,8-dimethoxyflavanone	CA7	0.7
5-hydroxy-7,8-dimethoxyflavanone	COX1	0.7
5-hydroxy-7,8-dimethoxyflavanone	CYP19A1	0.81
5-hydroxy-7,8-dimethoxyflavanone	CYP2C9	0.85
5-hydroxy-7,8-dimethoxyflavanone	D2R	0.7
5-hydroxy-7,8-dimethoxyflavanone	DNMT1	0.7
5-hydroxy-7,8-dimethoxyflavanone	gyrB	0.7
5-hydroxy-7,8-dimethoxyflavanone	DYRK1A	0.7
5-hydroxy-7,8-dimethoxyflavanone	DYRK1A	0.7
5-hydroxy-7,8-dimethoxyflavanone	EDNRA	0.7
5-hydroxy-7,8-dimethoxyflavanone	EDNRB	0.7
5-hydroxy-7,8-dimethoxyflavanone	ELAVL3	0.7
5-hydroxy-7,8-dimethoxyflavanone	INHA	0.7
5-hydroxy-7,8-dimethoxyflavanone	ESR	0.7
5-hydroxy-7,8-dimethoxyflavanone	ESR	0.71
5-hydroxy-7,8-dimethoxyflavanone	FASN	0.7
5-hydroxy-7,8-dimethoxyflavanone	G6PD	0.7
5-hydroxy-7,8-dimethoxyflavanone	HGF	0.7
5-hydroxy-7,8-dimethoxyflavanone	HSP90	0.83
5-hydroxy-7,8-dimethoxyflavanone	GAG-POL	0.7
5-hydroxy-7,8-dimethoxyflavanone	sssIM	0.7
5-hydroxy-7,8-dimethoxyflavanone	GRM5	0.7
5-hydroxy-7,8-dimethoxyflavanone	NOS3	0.7
5-hydroxy-7,8-dimethoxyflavanone	NFKB	0.7
5-hydroxy-7,8-dimethoxyflavanone	ABCB1	0.7
5-hydroxy-7,8-dimethoxyflavanone	PPARG	0.72
5-hydroxy-7,8-dimethoxyflavanone	SERPINE1	0.7
5-hydroxy-7,8-dimethoxyflavanone	PTPN1	0.71
5-hydroxy-7,8-dimethoxyflavanone	AKT1	0.7
5-hydroxy-7,8-dimethoxyflavanone	Mex5	0.7
5-hydroxy-7,8-dimethoxyflavanone	SLCO2B1	0.75
5-hydroxy-7,8-dimethoxyflavanone	SQLE	0.7
5-hydroxy-7,8-dimethoxyflavanone	TERT	0.7
5-hydroxy-7,8-dimethoxyflavanone	SHBG	0.81
5-hydroxy-7,8-dimethoxyflavanone	F10	0.7
5-hydroxy-7,8-dimethoxyflavanone	STAT1	0.7
5-hydroxy-7,8-dimethoxyflavanone	TTR	0.7
5-hydroxy-7,8-dimethoxyflavanone	TYR	0.7
5-hydroxy-7,8-dimethoxyflavanone	XDH	0.7
5-hydroxy-7,8-dimethoxyflavanone	XBP1	0.71
5-hydroxy-7,8-dimethoxyflavone	ALOX12	0.7
5-hydroxy-7,8-dimethoxyflavone	FASN	0.73
5-hydroxy-7,8-dimethoxyflavone	ACHE	0.7
5-hydroxy-7,8-dimethoxyflavone	ADORA1	0.81
5-hydroxy-7,8-dimethoxyflavone	ADORA3	0.77
5-hydroxy-7,8-dimethoxyflavone	ADORA2A	0.78
5-hydroxy-7,8-dimethoxyflavone	AKR1B1	0.92
5-hydroxy-7,8-dimethoxyflavone	ALR2	0.71
5-hydroxy-7,8-dimethoxyflavone	AKR1B1	0.73
5-hydroxy-7,8-dimethoxyflavone	GAA	0.72
5-hydroxy-7,8-dimethoxyflavone	MAOA	0.78
5-hydroxy-7,8-dimethoxyflavone	MAOB	0.77
5-hydroxy-7,8-dimethoxyflavone	DHTR	0.76
5-hydroxy-7,8-dimethoxyflavone	ALOX12	0.8
5-hydroxy-7,8-dimethoxyflavone	ALOX15	0.8
5-hydroxy-7,8-dimethoxyflavone	ALOX15	0.8
5-hydroxy-7,8-dimethoxyflavone	ALOX5	0.8
5-hydroxy-7,8-dimethoxyflavone	AHR	0.76
5-hydroxy-7,8-dimethoxyflavone	ABCG2	0.73
5-hydroxy-7,8-dimethoxyflavone	AURKB	0.73
5-hydroxy-7,8-dimethoxyflavone	NTRK2	0.85
5-hydroxy-7,8-dimethoxyflavone	CA12	0.73
5-hydroxy-7,8-dimethoxyflavone	CA2	0.73
5-hydroxy-7,8-dimethoxyflavone	CA4	0.73
5-hydroxy-7,8-dimethoxyflavone	CA7	0.73
5-hydroxy-7,8-dimethoxyflavone	CBR1	0.78
5-hydroxy-7,8-dimethoxyflavone	CSNK2A1	0.76
5-hydroxy-7,8-dimethoxyflavone	CISD1	0.76
5-hydroxy-7,8-dimethoxyflavone	CDK1	0.73
5-hydroxy-7,8-dimethoxyflavone	CDK1	0.7
5-hydroxy-7,8-dimethoxyflavone	CDK5	0.7
5-hydroxy-7,8-dimethoxyflavone	CDK6	0.7
5-hydroxy-7,8-dimethoxyflavone	PTGS1	0.73
5-hydroxy-7,8-dimethoxyflavone	CFTR	0.76
5-hydroxy-7,8-dimethoxyflavone	CYP19A1	0.76
5-hydroxy-7,8-dimethoxyflavone	CYP1A1	0.74
5-hydroxy-7,8-dimethoxyflavone	CYP1A1	0.8
5-hydroxy-7,8-dimethoxyflavone	CYP2C9	0.73
5-hydroxy-7,8-dimethoxyflavone	gyrB	0.7
5-hydroxy-7,8-dimethoxyflavone	TOP1	0.73
5-hydroxy-7,8-dimethoxyflavone	HTR2	0.7
5-hydroxy-7,8-dimethoxyflavone	Nt5e	0.73
5-hydroxy-7,8-dimethoxyflavone	ELAVL3	0.73
5-hydroxy-7,8-dimethoxyflavone	INHA	0.73
5-hydroxy-7,8-dimethoxyflavone	EGFR	0.7
5-hydroxy-7,8-dimethoxyflavone	HSD17B1	0.76
5-hydroxy-7,8-dimethoxyflavone	HSD17B2	0.76
5-hydroxy-7,8-dimethoxyflavone	ESR	0.76
5-hydroxy-7,8-dimethoxyflavone	GSK3B	0.73
5-hydroxy-7,8-dimethoxyflavone	GLO1	0.73
5-hydroxy-7,8-dimethoxyflavone	HGF	0.73
5-hydroxy-7,8-dimethoxyflavone	GAG-POL	0.74
5-hydroxy-7,8-dimethoxyflavone	IGF1R	0.73
5-hydroxy-7,8-dimethoxyflavone	PSIP1	0.73
5-hydroxy-7,8-dimethoxyflavone	DNPEP	0.73
5-hydroxy-7,8-dimethoxyflavone	KIT	0.8
5-hydroxy-7,8-dimethoxyflavone	MMP12	0.73
5-hydroxy-7,8-dimethoxyflavone	MAOA	0.73
5-hydroxy-7,8-dimethoxyflavone	OPRM1	0.94
5-hydroxy-7,8-dimethoxyflavone	NOX4	0.73
5-hydroxy-7,8-dimethoxyflavone	NR0B1	0.81
5-hydroxy-7,8-dimethoxyflavone	ABCB5	0.7
5-hydroxy-7,8-dimethoxyflavone	ABCB1	0.79
5-hydroxy-7,8-dimethoxyflavone	PIK3CG	0.73
5-hydroxy-7,8-dimethoxyflavone	E6AP	0.73
5-hydroxy-7,8-dimethoxyflavone	NEU1	0.77
5-hydroxy-7,8-dimethoxyflavone	SYN1	0.72
5-hydroxy-7,8-dimethoxyflavone	SI	0.8
5-hydroxy-7,8-dimethoxyflavone	SYN1	0.74
5-hydroxy-7,8-dimethoxyflavone	TERT	0.79
5-hydroxy-7,8-dimethoxyflavone	F10	0.7
5-hydroxy-7,8-dimethoxyflavone	TTR	0.76
5-hydroxy-7,8-dimethoxyflavone	TYR	0.79
5-hydroxy-7,8-dimethoxyflavone	LCK	0.7
5-hydroxy-7,8-dimethoxyflavone	FLT3	0.73
5-hydroxy-7,8-dimethoxyflavone	UFO	0.73
5-hydroxy-7,8-dimethoxyflavone	XDH	0.8
5-hydroxy-7,8-dimethoxyflavone	XDH	0.73
Skullcapflavone I	ALOX12	0.71
Skullcapflavone I	AKR1C3	0.72
Skullcapflavone I	FASN	0.71
Skullcapflavone I	ACHE	0.7
Skullcapflavone I	ADORA1	0.81
Skullcapflavone I	ADORA3	0.78
Skullcapflavone I	ADORA2A	0.78
Skullcapflavone I	AKR1B1	0.89
Skullcapflavone I	AKR1B1	0.7
Skullcapflavone I	AKR1B1	0.73
Skullcapflavone I	GAA	0.7
Skullcapflavone I	MAOA	0.78
Skullcapflavone I	MAOA	0.73
Skullcapflavone I	DHTR	0.71
Skullcapflavone I	ALOX12	0.74
Skullcapflavone I	ALOX15	0.74
Skullcapflavone I	ALOX15	0.74
Skullcapflavone I	ALOX5	0.74
Skullcapflavone I	AHR	0.76
Skullcapflavone I	ABCG2	0.73
Skullcapflavone I	AURKB	0.73
Skullcapflavone I	NTRK2	0.79
Skullcapflavone I	CA12	0.74
Skullcapflavone I	CA2	0.74
Skullcapflavone I	CA4	0.71
Skullcapflavone I	CA7	0.74
Skullcapflavone I	CBR1	0.73
Skullcapflavone I	CSNK2A1	0.72
Skullcapflavone I	CISD1	0.76
Skullcapflavone I	BCHE	0.7
Skullcapflavone I	CDK1	0.73
Skullcapflavone I	CDK1	0.71
Skullcapflavone I	CDK5	0.71
Skullcapflavone I	CDK6	0.71
Skullcapflavone I	PTGS1	0.71
Skullcapflavone I	CFTR	0.72
Skullcapflavone I	CYP19A1	0.72
Skullcapflavone I	CYP1A1	0.72
Skullcapflavone I	CYP1A1	0.76
Skullcapflavone I	CYP2C9	0.74
Skullcapflavone I	gyrB	0.7
Skullcapflavone I	TOP1	0.71
Skullcapflavone I	Nt5e	0.73
Skullcapflavone I	ELAVL3	0.73
Skullcapflavone I	INHA	0.73
Skullcapflavone I	EGFR	0.7
Skullcapflavone I	HSD17B1	0.72
Skullcapflavone I	HSD17B2	0.76
Skullcapflavone I	ESR	0.72
Skullcapflavone I	GSK3B	0.71
Skullcapflavone I	GLO1	0.73
Skullcapflavone I	HGF	0.73
Skullcapflavone I	GAG-POL	0.75
Skullcapflavone I	IGF1R	0.73
Skullcapflavone I	PSIP1	0.73
Skullcapflavone I	DNPEP	0.73
Skullcapflavone I	KIT	0.76
Skullcapflavone I	MMP12	0.71
Skullcapflavone I	MAOA	0.73
Skullcapflavone I	OPRM1	0.89
Skullcapflavone I	NOX4	0.73
Skullcapflavone I	NR0B1	0.76
Skullcapflavone I	ABCB5	0.71
Skullcapflavone I	ABCB1	0.74
Skullcapflavone I	PIK3CG	0.73
Skullcapflavone I	PDE5A	0.7
Skullcapflavone I	E6AP	0.73
Skullcapflavone I	NEU1	0.78
Skullcapflavone I	SYN1	0.7
Skullcapflavone I	SI	0.74
Skullcapflavone I	SYN1	0.75
Skullcapflavone I	TERT	0.76
Skullcapflavone I	F10	0.7
Skullcapflavone I	TTR	0.72
Skullcapflavone I	TYR	0.76
Skullcapflavone I	LCK	0.7
Skullcapflavone I	FLT3	0.71
Skullcapflavone I	UFO	0.73
Skullcapflavone I	XDH	0.8
Skullcapflavone I	XDH	0.71
5-hydroxy-7,8,2',5'- tetramethoxyflavone	ALOX12	0.71
5-hydroxy-7,8,2',5'- tetramethoxyflavone	FASN	0.71
5-hydroxy-7,8,2',5'- tetramethoxyflavone	ACHE	0.7
5-hydroxy-7,8,2',5'- tetramethoxyflavone	ADORA1	0.78
5-hydroxy-7,8,2',5'- tetramethoxyflavone	ADORA3	0.74
5-hydroxy-7,8,2',5'- tetramethoxyflavone	ADORA2A	0.71
5-hydroxy-7,8,2',5'- tetramethoxyflavone	AKR1B1	0.88
5-hydroxy-7,8,2',5'- tetramethoxyflavone	AKR1B1	0.7
5-hydroxy-7,8,2',5'- tetramethoxyflavone	AKR1B1	0.73
5-hydroxy-7,8,2',5'- tetramethoxyflavone	GAA	0.7
5-hydroxy-7,8,2',5'- tetramethoxyflavone	MAOA	0.71
5-hydroxy-7,8,2',5'- tetramethoxyflavone	MAOA	0.7
5-hydroxy-7,8,2',5'- tetramethoxyflavone	ALOX12	0.7
5-hydroxy-7,8,2',5'- tetramethoxyflavone	ALOX15	0.7
5-hydroxy-7,8,2',5'- tetramethoxyflavone	ALOX15	0.7
5-hydroxy-7,8,2',5'- tetramethoxyflavone	ALOX5	0.7
5-hydroxy-7,8,2',5'- tetramethoxyflavone	AHR	0.7
5-hydroxy-7,8,2',5'- tetramethoxyflavone	ABCG2	0.73
5-hydroxy-7,8,2',5'- tetramethoxyflavone	AURKB	0.73
5-hydroxy-7,8,2',5'- tetramethoxyflavone	NTRK2	0.71
5-hydroxy-7,8,2',5'- tetramethoxyflavone	CA12	0.77
5-hydroxy-7,8,2',5'- tetramethoxyflavone	CA2	0.77
5-hydroxy-7,8,2',5'- tetramethoxyflavone	CA4	0.71
5-hydroxy-7,8,2',5'- tetramethoxyflavone	CA7	0.77
5-hydroxy-7,8,2',5'- tetramethoxyflavone	CBR1	0.7
5-hydroxy-7,8,2',5'- tetramethoxyflavone	CISD1	0.7
5-hydroxy-7,8,2',5'- tetramethoxyflavone	CDK1	0.73
5-hydroxy-7,8,2',5'- tetramethoxyflavone	CDK1	0.71
5-hydroxy-7,8,2',5'- tetramethoxyflavone	CDK5	0.71
5-hydroxy-7,8,2',5'- tetramethoxyflavone	CDK6	0.71
5-hydroxy-7,8,2',5'- tetramethoxyflavone	PTGS1	0.71
5-hydroxy-7,8,2',5'- tetramethoxyflavone	CYP19A1	0.73
5-hydroxy-7,8,2',5'- tetramethoxyflavone	CYP1A1	0.76
5-hydroxy-7,8,2',5'- tetramethoxyflavone	CYP1A1	0.7
5-hydroxy-7,8,2',5'- tetramethoxyflavone	CYP2C9	0.77
5-hydroxy-7,8,2',5'- tetramethoxyflavone	gyrB	0.7
5-hydroxy-7,8,2',5'- tetramethoxyflavone	TOP1	0.71
5-hydroxy-7,8,2',5'- tetramethoxyflavone	Nt5e	0.73
5-hydroxy-7,8,2',5'- tetramethoxyflavone	ELAVL3	0.73
5-hydroxy-7,8,2',5'- tetramethoxyflavone	INHA	0.73
5-hydroxy-7,8,2',5'- tetramethoxyflavone	EGFR	0.7
5-hydroxy-7,8,2',5'- tetramethoxyflavone	HSD17B2	0.7
5-hydroxy-7,8,2',5'- tetramethoxyflavone	GSK3B	0.71
5-hydroxy-7,8,2',5'- tetramethoxyflavone	GLO1	0.73
5-hydroxy-7,8,2',5'- tetramethoxyflavone	HGF	0.73
5-hydroxy-7,8,2',5'- tetramethoxyflavone	GAG-POL	0.74
5-hydroxy-7,8,2',5'- tetramethoxyflavone	IGF1R	0.73
5-hydroxy-7,8,2',5'- tetramethoxyflavone	PSIP1	0.73
5-hydroxy-7,8,2',5'- tetramethoxyflavone	DNPEP	0.73
5-hydroxy-7,8,2',5'- tetramethoxyflavone	KIT	0.7
5-hydroxy-7,8,2',5'- tetramethoxyflavone	MMP12	0.71
5-hydroxy-7,8,2',5'- tetramethoxyflavone	MAOA	0.73
5-hydroxy-7,8,2',5'- tetramethoxyflavone	OPRM1	0.81
5-hydroxy-7,8,2',5'- tetramethoxyflavone	NOX4	0.73
5-hydroxy-7,8,2',5'- tetramethoxyflavone	NR0B1	0.7
5-hydroxy-7,8,2',5'- tetramethoxyflavone	ABCB1	0.7
5-hydroxy-7,8,2',5'- tetramethoxyflavone	PIK3CG	0.73
5-hydroxy-7,8,2',5'- tetramethoxyflavone	E6AP	0.73
5-hydroxy-7,8,2',5'- tetramethoxyflavone	NEU1	0.77
5-hydroxy-7,8,2',5'- tetramethoxyflavone	SI	0.7
5-hydroxy-7,8,2',5'- tetramethoxyflavone	SYN1	0.74
5-hydroxy-7,8,2',5'- tetramethoxyflavone	TERT	0.76
5-hydroxy-7,8,2',5'- tetramethoxyflavone	F10	0.7
5-hydroxy-7,8,2',5'- tetramethoxyflavone	TTR	0.71
5-hydroxy-7,8,2',5'- tetramethoxyflavone	TYR	0.76
5-hydroxy-7,8,2',5'- tetramethoxyflavone	LCK	0.7
5-hydroxy-7,8,2',5'- tetramethoxyflavone	FLT3	0.71
5-hydroxy-7,8,2',5'- tetramethoxyflavone	UFO	0.73
5-hydroxy-7,8,2',5'- tetramethoxyflavone	XDH	0.76
5-hydroxy-7,8,2',5'- tetramethoxyflavone	XDH	0.71
5,4'-dihydroxy-7,8,2',3'- tetramethoxyflavone	ALOX12	0.73
5,4'-dihydroxy-7,8,2',3'- tetramethoxyflavone	FASN	0.73
5,4'-dihydroxy-7,8,2',3'- tetramethoxyflavone	ACHE	0.7
5,4'-dihydroxy-7,8,2',3'- tetramethoxyflavone	ADORA1	0.76
5,4'-dihydroxy-7,8,2',3'- tetramethoxyflavone	ADORA3	0.73
5,4'-dihydroxy-7,8,2',3'- tetramethoxyflavone	ADORA2A	0.7
5,4'-dihydroxy-7,8,2',3'- tetramethoxyflavone	AKR1B1	0.9
5,4'-dihydroxy-7,8,2',3'- tetramethoxyflavone	AKR1B1	0.7
5,4'-dihydroxy-7,8,2',3'- tetramethoxyflavone	AKR1B1	0.75
5,4'-dihydroxy-7,8,2',3'- tetramethoxyflavone	GAA	0.7
5,4'-dihydroxy-7,8,2',3'- tetramethoxyflavone	MAOA	0.7
5,4'-dihydroxy-7,8,2',3'- tetramethoxyflavone	MAOB	0.7
5,4'-dihydroxy-7,8,2',3'- tetramethoxyflavone	ALOX12	0.7
5,4'-dihydroxy-7,8,2',3'- tetramethoxyflavone	ALOX15	0.7
5,4'-dihydroxy-7,8,2',3'- tetramethoxyflavone	ALOX15	0.7
5,4'-dihydroxy-7,8,2',3'- tetramethoxyflavone	ALOX5	0.7
5,4'-dihydroxy-7,8,2',3'- tetramethoxyflavone	AHR	0.72
5,4'-dihydroxy-7,8,2',3'- tetramethoxyflavone	ABCG2	0.75
5,4'-dihydroxy-7,8,2',3'- tetramethoxyflavone	AURKB	0.75
5,4'-dihydroxy-7,8,2',3'- tetramethoxyflavone	NTRK2	0.7
5,4'-dihydroxy-7,8,2',3'- tetramethoxyflavone	CA12	0.79
5,4'-dihydroxy-7,8,2',3'- tetramethoxyflavone	CA2	0.79
5,4'-dihydroxy-7,8,2',3'- tetramethoxyflavone	CA4	0.73
5,4'-dihydroxy-7,8,2',3'- tetramethoxyflavone	CA7	0.79
5,4'-dihydroxy-7,8,2',3'- tetramethoxyflavone	CSNK2A1	0.7
5,4'-dihydroxy-7,8,2',3'- tetramethoxyflavone	CISD1	0.72
5,4'-dihydroxy-7,8,2',3'- tetramethoxyflavone	BCHE	0.7
5,4'-dihydroxy-7,8,2',3'- tetramethoxyflavone	CDK1	0.75
5,4'-dihydroxy-7,8,2',3'- tetramethoxyflavone	CDK1	0.73
5,4'-dihydroxy-7,8,2',3'- tetramethoxyflavone	CDK5	0.73
5,4'-dihydroxy-7,8,2',3'- tetramethoxyflavone	CDK6	0.73
5,4'-dihydroxy-7,8,2',3'- tetramethoxyflavone	PTGS1	0.73
5,4'-dihydroxy-7,8,2',3'- tetramethoxyflavone	CFTR	0.7
5,4'-dihydroxy-7,8,2',3'- tetramethoxyflavone	CYP19A1	0.7
5,4'-dihydroxy-7,8,2',3'- tetramethoxyflavone	CYP1A1	0.78
5,4'-dihydroxy-7,8,2',3'- tetramethoxyflavone	CYP1A1	0.7
5,4'-dihydroxy-7,8,2',3'- tetramethoxyflavone	CYP2C9	0.79
5,4'-dihydroxy-7,8,2',3'- tetramethoxyflavone	gyrB	0.7
5,4'-dihydroxy-7,8,2',3'- tetramethoxyflavone	TOP1	0.73
5,4'-dihydroxy-7,8,2',3'- tetramethoxyflavone	Nt5e	0.75
5,4'-dihydroxy-7,8,2',3'- tetramethoxyflavone	ELAVL3	0.75
5,4'-dihydroxy-7,8,2',3'- tetramethoxyflavone	INHA	0.75
5,4'-dihydroxy-7,8,2',3'- tetramethoxyflavone	EGFR	0.7
5,4'-dihydroxy-7,8,2',3'- tetramethoxyflavone	HSD17B1	0.7
5,4'-dihydroxy-7,8,2',3'- tetramethoxyflavone	HSD17B2	0.72
5,4'-dihydroxy-7,8,2',3'- tetramethoxyflavone	ESR	0.7
5,4'-dihydroxy-7,8,2',3'- tetramethoxyflavone	GSK3B	0.73
5,4'-dihydroxy-7,8,2',3'- tetramethoxyflavone	GLO1	0.75
5,4'-dihydroxy-7,8,2',3'- tetramethoxyflavone	HGF	0.75
5,4'-dihydroxy-7,8,2',3'- tetramethoxyflavone	GAG-POL	0.77
5,4'-dihydroxy-7,8,2',3'- tetramethoxyflavone	IGF1R	0.75
5,4'-dihydroxy-7,8,2',3'- tetramethoxyflavone	PSIP1	0.75
5,4'-dihydroxy-7,8,2',3'- tetramethoxyflavone	DNPEP	0.75
5,4'-dihydroxy-7,8,2',3'- tetramethoxyflavone	KIT	0.71
5,4'-dihydroxy-7,8,2',3'- tetramethoxyflavone	MMP12	0.73
5,4'-dihydroxy-7,8,2',3'- tetramethoxyflavone	MAOA	0.75
5,4'-dihydroxy-7,8,2',3'- tetramethoxyflavone	OPRM1	0.83
5,4'-dihydroxy-7,8,2',3'- tetramethoxyflavone	NOX4	0.75
5,4'-dihydroxy-7,8,2',3'- tetramethoxyflavone	NR0B1	0.72
5,4'-dihydroxy-7,8,2',3'- tetramethoxyflavone	ABCB1	0.7
5,4'-dihydroxy-7,8,2',3'- tetramethoxyflavone	PIK3CG	0.75
5,4'-dihydroxy-7,8,2',3'- tetramethoxyflavone	PDE5A	0.7
5,4'-dihydroxy-7,8,2',3'- tetramethoxyflavone	E6AP	0.75
5,4'-dihydroxy-7,8,2',3'- tetramethoxyflavone	NEU1	0.79
5,4'-dihydroxy-7,8,2',3'- tetramethoxyflavone	SI	0.7
5,4'-dihydroxy-7,8,2',3'- tetramethoxyflavone	SYN1	0.77
5,4'-dihydroxy-7,8,2',3'- tetramethoxyflavone	TERT	0.78
5,4'-dihydroxy-7,8,2',3'- tetramethoxyflavone	F10	0.7
5,4'-dihydroxy-7,8,2',3'- tetramethoxyflavone	TTR	0.7
5,4'-dihydroxy-7,8,2',3'- tetramethoxyflavone	TYR	0.78
5,4'-dihydroxy-7,8,2',3'- tetramethoxyflavone	LCK	0.7
5,4'-dihydroxy-7,8,2',3'- tetramethoxyflavone	FLT3	0.73
5,4'-dihydroxy-7,8,2',3'- tetramethoxyflavone	UFO	0.75
5,4'-dihydroxy-7,8,2',3'- tetramethoxyflavone	XDH	0.78
5,4'-dihydroxy-7,8,2',3'- tetramethoxyflavone	XDH	0.73
Andrographidine A	CA12	0.7
Andrographidine A	CA4	0.7
Andrographidine A	CA7	0.7
Andrographidine A	CYP2C9	0.7
Andrographidine A	HSP90	0.7
Andrographidine A	SGLT2	0.73
Andrographidine A	SLCO2B1	0.7
Andrographidine C	ACHE	0.7
Andrographidine C	ALDH2	0.7
Andrographidine C	AKR1B1	0.7
Andrographidine C	AKR1B1	0.7
Andrographidine C	ADRA2A	0.7
Andrographidine C	ALOX5	0.7
Andrographidine C	CA12	0.7
Andrographidine C	CA2	0.7
Andrographidine C	CA4	0.7
Andrographidine C	CA7	0.7
Andrographidine C	PDE5A	0.7
Andrographidine C	CHRM5	0.7
Andrographidine C	CYP3A	0.7
Andrographidine C	EGFR	0.71
Andrographidine C	IL2RA	0.7
Andrographidine C	ALPI	0.7
Andrographidine C	NOX4	0.7
Andrographidine C	HPA	0.7
Andrographidine C	PTPN1	0.72
Andrographidine C	RPS6KA3	0.7
Andrographidine C	F10	0.74
Andrographidine C	TNF	0.83

## Sheet: Table S5
Table S5: Gene Ontology (GO) functional enrichment analysis: Regulated molecular functions of 16 protein targets modulated by the phytocompounds
16 protein targets associated with HBV infection and HCC modulates 46 molecular functions
Abbreviations: GO Gene Ontology; FDR False discovery rate
GO ID	Molecular function	Gene count	FDR	Gene IDs
GO:0004672	protein kinase activity	12	4.94e-13	AKT1, CDK1, CDK2, CDK6, EGFR, HGF, IGF1R, MAP2K1, MAPK1, PRKCA, PRKCB, PRKCG
GO:0016772	transferase activity, transferring phosphorus-containing groups	13	6.78e-13	AKT1, CDK1, CDK2, CDK6, EGFR, HGF, IGF1R, MAP2K1, MAPK1, PRKCA, PRKCB, PRKCG, TERT
GO:0004674	protein serine/threonine kinase activity	10	1.15e-11	AKT1, CDK1, CDK2, CDK6, EGFR, MAP2K1, MAPK1, PRKCA, PRKCB, PRKCG
GO:0005524	ATP binding	11	3.69e-08	AKT1, CDK1, CDK2, CDK6, EGFR, IGF1R, MAP2K1, MAPK1, PRKCA, PRKCB, PRKCG
GO:0004698	calcium-dependent protein kinase C activity	3	2.41e-07	PRKCA, PRKCB, PRKCG
GO:1901363	heterocyclic compound binding	15	4.49e-07	AKT1, BCL2, CDK1, CDK2, CDK6, EGFR, IGF1R, MAP2K1, MAPK1, PRKCA, PRKCB, PRKCG, STAT3, TERT, TNF
GO:0004712	protein serine/threonine/tyrosine kinase activity	4	5.23e-07	AKT1, MAP2K1, MAPK1, PRKCG
GO:0097159	organic cyclic compound binding	15	5.23e-07	AKT1, BCL2, CDK1, CDK2, CDK6, EGFR, IGF1R, MAP2K1, MAPK1, PRKCA, PRKCB, PRKCG, STAT3, TERT, TNF
GO:0019902	phosphatase binding	5	1.69e-06	AKT1, BCL2, EGFR, MAPK1, STAT3
GO:0035173	histone kinase activity	3	3.19e-06	CDK1, PRKCA, PRKCB
GO:0005515	protein binding	15	6.21e-06	AKT1, BCL2, CDK1, CDK2, CDK6, EGFR, HGF, IGF1R, MAP2K1, MAPK1, PRKCA, PRKCB, STAT3, TERT, TNF
GO:0042802	identical protein binding	9	1.57e-05	AKT1, BCL2, EGFR, HGF, IGF1R, MAPK1, STAT3, TERT, TNF
GO:0019903	protein phosphatase binding	4	1.8e-05	AKT1, BCL2, EGFR, STAT3
GO:0030332	cyclin binding	3	1.8e-05	CDK1, CDK2, CDK6
GO:0004693	cyclin-dependent protein serine/threonine kinase activity	3	1.85e-05	CDK1, CDK2, CDK6
GO:0035403	histone kinase activity (H3-T6 specific)	2	2.08e-05	PRKCA, PRKCB
GO:0004713	protein tyrosine kinase activity	4	6.8e-05	EGFR, HGF, IGF1R, MAP2K1
GO:0019899	enzyme binding	9	8.25e-05	AKT1, BCL2, EGFR, HGF, MAPK1, PRKCA, PRKCB, STAT3, TNF
GO:0008353	RNA polymerase II CTD heptapeptide repeat kinase activity	2	0.00014	CDK1, MAPK1
GO:0004708	MAP kinase kinase activity	2	0.0004	MAP2K1, MAPK1
GO:0019901	protein kinase binding	5	0.00042	AKT1, EGFR, MAPK1, PRKCB, STAT3
GO:0008134	transcription factor binding	5	0.00045	BCL2, MAPK1, PRKCB, STAT3, TERT
GO:0005102	signaling receptor binding	7	0.00046	EGFR, HGF, IGF1R, PRKCA, PRKCB, STAT3, TNF
GO:0051721	protein phosphatase 2A binding	2	0.0012	AKT1, BCL2
GO:0005488	binding	16	0.0014	AKT1, BCL2, CDK1, CDK2, CDK6, EGFR, HGF, IGF1R, MAP2K1, MAPK1, PRKCA, PRKCB, PRKCG, STAT3, TERT, TNF
GO:0043167	ion binding	12	0.0015	AKT1, CDK1, CDK2, CDK6, EGFR, IGF1R, MAP2K1, MAPK1, PRKCA, PRKCB, PRKCG, TERT
GO:0046983	protein dimerization activity	6	0.0016	AKT1, BCL2, EGFR, HGF, STAT3, TERT
GO:0003682	chromatin binding	4	0.0024	CDK1, EGFR, PRKCB, STAT3
GO:0005080	protein kinase C binding	2	0.003	AKT1, PRKCB
GO:0060089	molecular transducer activity	6	0.003	CDK1, CDK2, CDK6, EGFR, IGF1R, STAT3
GO:0004714	transmembrane receptor protein tyrosine kinase activity	2	0.0044	EGFR, IGF1R
GO:0046934	phosphatidylinositol-4,5-bisphosphate 3-kinase activity	2	0.0053	EGFR, HGF
GO:0001618	virus receptor activity	2	0.0062	CDK1, EGFR
GO:0098772	molecular function regulator	6	0.007	AKT1, BCL2, EGFR, HGF, MAP2K1, TNF
GO:0035258	steroid hormone receptor binding	2	0.0081	PRKCB, STAT3
GO:0042562	hormone binding	2	0.0081	EGFR, IGF1R
GO:0047485	protein N-terminus binding	2	0.0113	MAP2K1, TERT
GO:0016922	nuclear receptor binding	2	0.0116	PRKCB, STAT3
GO:0042803	protein homodimerization activity	4	0.012	AKT1, BCL2, STAT3, TERT
GO:0005178	integrin binding	2	0.0134	EGFR, PRKCA
GO:0019838	growth factor binding	2	0.0141	EGFR, IGF1R
GO:0002020	protease binding	2	0.0158	BCL2, TNF
GO:0046982	protein heterodimerization activity	3	0.0229	BCL2, EGFR, HGF
GO:0003677	DNA binding	6	0.0281	BCL2, EGFR, MAPK1, STAT3, TERT, TNF
GO:0008022	protein C-terminus binding	2	0.0295	MAP2K1, TERT
GO:0005088	Ras guanyl-nucleotide exchange factor activity	2	0.0439	EGFR, HGF

## Sheet: Table S6
Table S6: GO process enrichment analysis: Molecular processes of 16 protein targets modulated by the phytocompounds
16 protein targets associated with HBV infection and HCC modulates 599 molecular processes
Abbreviations: GO Gene Ontology; FDR False discovery rate
GO ID	Molecular process	Gene count	FDR	Gene IDs
GO:0006468	protein phosphorylation	14	3.75e-14	AKT1, BCL2, CDK1, CDK2, CDK6, EGFR, HGF, IGF1R, MAP2K1, MAPK1, PRKCA, PRKCB, PRKCG, TNF
GO:0016310	phosphorylation	15	3.75e-14	AKT1, BCL2, CDK1, CDK2, CDK6, EGFR, HGF, IGF1R, MAP2K1, MAPK1, PRKCA, PRKCB, PRKCG, STAT3, TNF
GO:0008284	positive regulation of cell population proliferation	13	1.21e-12	AKT1, BCL2, CDK1, CDK2, CDK6, EGFR, HGF, IGF1R, MAPK1, PRKCA, STAT3, TERT, TNF
GO:0035556	intracellular signal transduction	14	1.9e-11	AKT1, BCL2, CDK1, CDK2, EGFR, HGF, IGF1R, MAP2K1, MAPK1, PRKCA, PRKCB, PRKCG, STAT3, TNF
GO:0018193	peptidyl-amino acid modification	12	1.97e-11	AKT1, BCL2, CDK1, CDK2, EGFR, HGF, IGF1R, MAP2K1, MAPK1, PRKCA, PRKCB, PRKCG
GO:0042127	regulation of cell population proliferation	14	1.97e-11	AKT1, BCL2, CDK1, CDK2, CDK6, EGFR, HGF, IGF1R, MAP2K1, MAPK1, PRKCA, STAT3, TERT, TNF
GO:0018107	peptidyl-threonine phosphorylation	7	7.35e-11	AKT1, BCL2, CDK1, MAP2K1, MAPK1, PRKCA, PRKCB
GO:0018105	peptidyl-serine phosphorylation	8	1.16e-10	AKT1, BCL2, CDK1, CDK2, MAPK1, PRKCA, PRKCB, PRKCG
GO:0032879	regulation of localization	15	1.24e-10	AKT1, BCL2, CDK1, CDK6, EGFR, HGF, IGF1R, MAP2K1, MAPK1, PRKCA, PRKCB, PRKCG, STAT3, TERT, TNF
GO:2000145	regulation of cell motility	11	3.65e-10	AKT1, BCL2, CDK6, EGFR, HGF, IGF1R, MAPK1, PRKCA, STAT3, TERT, TNF
GO:0043066	negative regulation of apoptotic process	11	6.64e-10	AKT1, BCL2, CDK1, EGFR, HGF, IGF1R, PRKCA, PRKCG, STAT3, TERT, TNF
GO:0007346	regulation of mitotic cell cycle	10	7.69e-10	AKT1, BCL2, CDK1, CDK2, CDK6, EGFR, MAP2K1, PRKCA, TERT, TNF
GO:0045595	regulation of cell differentiation	13	7.69e-10	AKT1, BCL2, CDK1, CDK6, EGFR, HGF, MAP2K1, MAPK1, PRKCA, PRKCB, STAT3, TERT, TNF
GO:0048583	regulation of response to stimulus	16	7.69e-10	AKT1, BCL2, CDK1, CDK2, CDK6, EGFR, HGF, IGF1R, MAP2K1, MAPK1, PRKCA, PRKCB, PRKCG, STAT3, TERT, TNF
GO:0080135	regulation of cellular response to stress	10	7.69e-10	AKT1, CDK6, EGFR, HGF, IGF1R, MAP2K1, MAPK1, PRKCG, TERT, TNF
GO:0031399	regulation of protein modification process	13	1.01e-09	AKT1, BCL2, CDK1, CDK6, EGFR, HGF, IGF1R, MAP2K1, MAPK1, PRKCA, PRKCG, STAT3, TNF
GO:1902531	regulation of intracellular signal transduction	13	1.09e-09	AKT1, BCL2, CDK1, CDK2, EGFR, HGF, IGF1R, MAP2K1, MAPK1, PRKCA, PRKCB, STAT3, TNF
GO:1902533	positive regulation of intracellular signal transduction	11	1.25e-09	AKT1, BCL2, CDK1, EGFR, HGF, MAP2K1, MAPK1, PRKCA, PRKCB, STAT3, TNF
GO:2000045	regulation of G1/S transition of mitotic cell cycle	7	1.52e-09	AKT1, BCL2, CDK1, CDK2, CDK6, EGFR, TERT
GO:0001932	regulation of protein phosphorylation	12	1.62e-09	AKT1, BCL2, CDK1, CDK6, EGFR, HGF, IGF1R, MAP2K1, MAPK1, PRKCA, STAT3, TNF
GO:0030335	positive regulation of cell migration	9	1.62e-09	AKT1, BCL2, EGFR, HGF, IGF1R, MAPK1, PRKCA, TERT, TNF
GO:0071900	regulation of protein serine/threonine kinase activity	9	2.69e-09	AKT1, CDK1, CDK6, EGFR, HGF, IGF1R, MAP2K1, MAPK1, TNF
GO:0030334	regulation of cell migration	10	3.15e-09	AKT1, BCL2, EGFR, HGF, IGF1R, MAPK1, PRKCA, STAT3, TERT, TNF
GO:0048523	negative regulation of cellular process	16	3.22e-09	AKT1, BCL2, CDK1, CDK2, CDK6, EGFR, HGF, IGF1R, MAP2K1, MAPK1, PRKCA, PRKCB, PRKCG, STAT3, TERT, TNF
GO:0009967	positive regulation of signal transduction	12	3.26e-09	AKT1, BCL2, CDK1, EGFR, HGF, MAP2K1, MAPK1, PRKCA, PRKCB, STAT3, TERT, TNF
GO:0042981	regulation of apoptotic process	12	3.38e-09	AKT1, BCL2, CDK1, EGFR, HGF, IGF1R, MAP2K1, PRKCA, PRKCG, STAT3, TERT, TNF
GO:0048584	positive regulation of response to stimulus	13	4.38e-09	AKT1, BCL2, CDK1, EGFR, HGF, MAP2K1, MAPK1, PRKCA, PRKCB, PRKCG, STAT3, TERT, TNF
GO:0051726	regulation of cell cycle	11	4.41e-09	AKT1, BCL2, CDK1, CDK2, CDK6, EGFR, MAP2K1, PRKCA, STAT3, TERT, TNF
GO:0032872	regulation of stress-activated MAPK cascade	7	8.92e-09	AKT1, EGFR, HGF, IGF1R, MAP2K1, MAPK1, TNF
GO:0051054	positive regulation of DNA metabolic process	7	8.92e-09	AKT1, CDK1, CDK2, EGFR, HGF, MAPK1, PRKCG
GO:0048522	positive regulation of cellular process	16	1.06e-08	AKT1, BCL2, CDK1, CDK2, CDK6, EGFR, HGF, IGF1R, MAP2K1, MAPK1, PRKCA, PRKCB, PRKCG, STAT3, TERT, TNF
GO:0051173	positive regulation of nitrogen compound metabolic process	14	1.21e-08	AKT1, BCL2, CDK1, CDK2, EGFR, HGF, MAP2K1, MAPK1, PRKCA, PRKCB, PRKCG, STAT3, TERT, TNF
GO:0080134	regulation of response to stress	11	1.48e-08	AKT1, CDK6, EGFR, HGF, IGF1R, MAP2K1, MAPK1, PRKCA, PRKCG, TERT, TNF
GO:0045935	positive regulation of nucleobase-containing compound metabolic process	12	1.57e-08	AKT1, CDK1, CDK2, EGFR, HGF, MAP2K1, MAPK1, PRKCB, PRKCG, STAT3, TERT, TNF
GO:0001934	positive regulation of protein phosphorylation	10	1.61e-08	AKT1, BCL2, CDK1, EGFR, HGF, MAP2K1, MAPK1, PRKCA, STAT3, TNF
GO:0009966	regulation of signal transduction	14	1.61e-08	AKT1, BCL2, CDK1, CDK2, EGFR, HGF, IGF1R, MAP2K1, MAPK1, PRKCA, PRKCB, STAT3, TERT, TNF
GO:0048708	astrocyte differentiation	5	1.61e-08	CDK6, EGFR, MAP2K1, MAPK1, STAT3
GO:0031325	positive regulation of cellular metabolic process	14	1.73e-08	AKT1, BCL2, CDK1, CDK2, EGFR, HGF, MAP2K1, MAPK1, PRKCA, PRKCB, PRKCG, STAT3, TERT, TNF
GO:0010604	positive regulation of macromolecule metabolic process	14	1.87e-08	AKT1, BCL2, CDK1, CDK2, EGFR, HGF, MAP2K1, MAPK1, PRKCA, PRKCB, PRKCG, STAT3, TERT, TNF
GO:0008283	cell population proliferation	9	2.35e-08	AKT1, BCL2, CDK1, EGFR, HGF, MAP2K1, MAPK1, STAT3, TNF
GO:1901698	response to nitrogen compound	10	2.35e-08	AKT1, CDK1, CDK2, EGFR, IGF1R, MAPK1, PRKCG, STAT3, TERT, TNF
GO:2000026	regulation of multicellular organismal development	12	2.62e-08	AKT1, BCL2, CDK1, CDK6, EGFR, HGF, MAP2K1, PRKCA, PRKCB, STAT3, TERT, TNF
GO:0048699	generation of neurons	11	3.08e-08	AKT1, BCL2, CDK1, CDK6, EGFR, HGF, MAP2K1, MAPK1, PRKCA, STAT3, TERT
GO:0046686	response to cadmium ion	5	3.32e-08	AKT1, CDK1, EGFR, MAPK1, TERT
GO:0043408	regulation of MAPK cascade	9	3.34e-08	AKT1, CDK1, EGFR, HGF, IGF1R, MAP2K1, MAPK1, PRKCA, TNF
GO:0009895	negative regulation of catabolic process	7	3.65e-08	AKT1, BCL2, EGFR, HGF, PRKCG, STAT3, TNF
GO:1903829	positive regulation of cellular protein localization	7	4.62e-08	AKT1, BCL2, CDK1, EGFR, MAPK1, TERT, TNF
GO:0010001	glial cell differentiation	6	5.53e-08	AKT1, CDK6, EGFR, MAP2K1, MAPK1, STAT3
GO:0051240	positive regulation of multicellular organismal process	11	6.42e-08	AKT1, BCL2, CDK1, EGFR, HGF, MAP2K1, PRKCA, PRKCB, STAT3, TERT, TNF
GO:0051239	regulation of multicellular organismal process	13	9.64e-08	AKT1, BCL2, CDK1, CDK6, EGFR, HGF, MAP2K1, MAPK1, PRKCA, PRKCB, STAT3, TERT, TNF
GO:0051171	regulation of nitrogen compound metabolic process	16	9.89e-08	AKT1, BCL2, CDK1, CDK2, CDK6, EGFR, HGF, IGF1R, MAP2K1, MAPK1, PRKCA, PRKCB, PRKCG, STAT3, TERT, TNF
GO:0010033	response to organic substance	13	1.06e-07	AKT1, BCL2, CDK1, CDK2, EGFR, HGF, IGF1R, MAPK1, PRKCA, PRKCG, STAT3, TERT, TNF
GO:0043405	regulation of MAP kinase activity	7	1.19e-07	CDK1, EGFR, HGF, IGF1R, MAP2K1, MAPK1, TNF
GO:0007399	nervous system development	12	1.23e-07	AKT1, BCL2, CDK1, CDK6, EGFR, HGF, MAP2K1, MAPK1, PRKCA, PRKCG, STAT3, TERT
GO:0071902	positive regulation of protein serine/threonine kinase activity	7	1.23e-07	AKT1, CDK1, EGFR, HGF, MAP2K1, MAPK1, TNF
GO:1901699	cellular response to nitrogen compound	8	1.31e-07	AKT1, CDK2, EGFR, IGF1R, MAPK1, STAT3, TERT, TNF
GO:0032147	activation of protein kinase activity	7	1.38e-07	AKT1, CDK1, EGFR, HGF, MAP2K1, MAPK1, TNF
GO:0080090	regulation of primary metabolic process	16	1.38e-07	AKT1, BCL2, CDK1, CDK2, CDK6, EGFR, HGF, IGF1R, MAP2K1, MAPK1, PRKCA, PRKCB, PRKCG, STAT3, TERT, TNF
GO:0014070	response to organic cyclic compound	9	1.44e-07	AKT1, BCL2, CDK1, EGFR, MAPK1, PRKCG, STAT3, TERT, TNF
GO:0050790	regulation of catalytic activity	12	1.44e-07	AKT1, BCL2, CDK1, CDK6, EGFR, HGF, IGF1R, MAP2K1, MAPK1, STAT3, TERT, TNF
GO:0000302	response to reactive oxygen species	6	1.47e-07	AKT1, BCL2, CDK1, CDK2, EGFR, MAPK1
GO:0044093	positive regulation of molecular function	11	1.51e-07	AKT1, BCL2, CDK1, EGFR, HGF, MAP2K1, MAPK1, PRKCB, STAT3, TERT, TNF
GO:0007165	signal transduction	15	1.58e-07	AKT1, BCL2, CDK1, CDK2, CDK6, EGFR, HGF, IGF1R, MAP2K1, MAPK1, PRKCA, PRKCB, PRKCG, STAT3, TNF
GO:0060255	regulation of macromolecule metabolic process	16	1.62e-07	AKT1, BCL2, CDK1, CDK2, CDK6, EGFR, HGF, IGF1R, MAP2K1, MAPK1, PRKCA, PRKCB, PRKCG, STAT3, TERT, TNF
GO:0031323	regulation of cellular metabolic process	16	1.64e-07	AKT1, BCL2, CDK1, CDK2, CDK6, EGFR, HGF, IGF1R, MAP2K1, MAPK1, PRKCA, PRKCB, PRKCG, STAT3, TERT, TNF
GO:0051049	regulation of transport	11	1.64e-07	AKT1, BCL2, CDK1, EGFR, MAP2K1, MAPK1, PRKCA, PRKCB, PRKCG, TERT, TNF
GO:0051094	positive regulation of developmental process	10	1.79e-07	AKT1, BCL2, CDK1, HGF, MAP2K1, PRKCA, PRKCB, STAT3, TERT, TNF
GO:0010557	positive regulation of macromolecule biosynthetic process	11	1.85e-07	AKT1, CDK1, CDK2, EGFR, HGF, MAP2K1, MAPK1, PRKCB, STAT3, TERT, TNF
GO:0016572	histone phosphorylation	4	2.14e-07	CDK1, CDK2, PRKCA, PRKCB
GO:0051716	cellular response to stimulus	16	2.18e-07	AKT1, BCL2, CDK1, CDK2, CDK6, EGFR, HGF, IGF1R, MAP2K1, MAPK1, PRKCA, PRKCB, PRKCG, STAT3, TERT, TNF
GO:0048732	gland development	7	2.79e-07	AKT1, BCL2, EGFR, HGF, MAP2K1, MAPK1, TNF
GO:0031328	positive regulation of cellular biosynthetic process	11	2.91e-07	AKT1, CDK1, CDK2, EGFR, HGF, MAP2K1, MAPK1, PRKCB, STAT3, TERT, TNF
GO:0034599	cellular response to oxidative stress	6	3.24e-07	AKT1, BCL2, CDK1, CDK2, EGFR, MAPK1
GO:0043085	positive regulation of catalytic activity	10	3.24e-07	AKT1, BCL2, CDK1, EGFR, HGF, MAP2K1, MAPK1, STAT3, TERT, TNF
GO:0044260	cellular macromolecule metabolic process	16	3.36e-07	AKT1, BCL2, CDK1, CDK2, CDK6, EGFR, HGF, IGF1R, MAP2K1, MAPK1, PRKCA, PRKCB, PRKCG, STAT3, TERT, TNF
GO:0060968	regulation of gene silencing	5	3.57e-07	CDK2, EGFR, MAP2K1, STAT3, TERT
GO:2001237	negative regulation of extrinsic apoptotic signaling pathway	5	3.71e-07	AKT1, BCL2, HGF, TERT, TNF
GO:0032501	multicellular organismal process	16	4.09e-07	AKT1, BCL2, CDK1, CDK2, CDK6, EGFR, HGF, IGF1R, MAP2K1, MAPK1, PRKCA, PRKCB, PRKCG, STAT3, TERT, TNF
GO:0006950	response to stress	13	4.8e-07	AKT1, BCL2, CDK1, CDK2, EGFR, MAP2K1, MAPK1, PRKCA, PRKCB, PRKCG, STAT3, TERT, TNF
GO:0042221	response to chemical	14	5.2e-07	AKT1, BCL2, CDK1, CDK2, EGFR, HGF, IGF1R, MAP2K1, MAPK1, PRKCA, PRKCG, STAT3, TERT, TNF
GO:2001240	negative regulation of extrinsic apoptotic signaling pathway in absence of ligand	4	5.2e-07	AKT1, BCL2, TERT, TNF
GO:0065009	regulation of molecular function	13	5.69e-07	AKT1, BCL2, CDK1, CDK6, EGFR, HGF, IGF1R, MAP2K1, MAPK1, PRKCB, STAT3, TERT, TNF
GO:0007568	aging	6	6.33e-07	AKT1, BCL2, CDK1, MAP2K1, STAT3, TERT
GO:1903508	positive regulation of nucleic acid-templated transcription	10	7.06e-07	AKT1, CDK2, EGFR, HGF, MAP2K1, MAPK1, PRKCB, STAT3, TERT, TNF
GO:0043406	positive regulation of MAP kinase activity	6	7.51e-07	CDK1, EGFR, HGF, MAP2K1, MAPK1, TNF
GO:0034614	cellular response to reactive oxygen species	5	7.61e-07	AKT1, CDK1, CDK2, EGFR, MAPK1
GO:0060341	regulation of cellular localization	8	8.91e-07	AKT1, BCL2, CDK1, EGFR, MAP2K1, MAPK1, TERT, TNF
GO:0010035	response to inorganic substance	7	9.81e-07	AKT1, BCL2, CDK1, CDK2, EGFR, MAPK1, TERT
GO:0009892	negative regulation of metabolic process	12	1.04e-06	AKT1, BCL2, CDK2, CDK6, EGFR, HGF, IGF1R, MAP2K1, PRKCG, STAT3, TERT, TNF
GO:0051254	positive regulation of RNA metabolic process	10	1.05e-06	AKT1, CDK2, EGFR, HGF, MAP2K1, MAPK1, PRKCB, STAT3, TERT, TNF
GO:0007169	transmembrane receptor protein tyrosine kinase signaling pathway	7	1.06e-06	AKT1, EGFR, HGF, IGF1R, MAPK1, PRKCA, STAT3
GO:0033135	regulation of peptidyl-serine phosphorylation	5	1.13e-06	AKT1, BCL2, EGFR, HGF, TNF
GO:0043410	positive regulation of MAPK cascade	7	1.25e-06	CDK1, EGFR, HGF, MAP2K1, MAPK1, PRKCA, TNF
GO:0045786	negative regulation of cell cycle	7	1.31e-06	BCL2, CDK1, CDK2, CDK6, EGFR, MAP2K1, TNF
GO:0010468	regulation of gene expression	14	1.42e-06	AKT1, BCL2, CDK1, CDK2, CDK6, EGFR, HGF, MAP2K1, MAPK1, PRKCA, PRKCB, STAT3, TERT, TNF
GO:0009894	regulation of catabolic process	8	1.66e-06	AKT1, BCL2, EGFR, HGF, PRKCA, PRKCG, STAT3, TNF
GO:0000187	activation of MAPK activity	5	1.68e-06	CDK1, HGF, MAP2K1, MAPK1, TNF
GO:0050678	regulation of epithelial cell proliferation	6	1.73e-06	AKT1, CDK6, EGFR, PRKCA, STAT3, TNF
GO:0060284	regulation of cell development	8	1.73e-06	AKT1, BCL2, CDK1, HGF, MAP2K1, STAT3, TERT, TNF
GO:0009611	response to wounding	7	1.84e-06	BCL2, CDK1, EGFR, MAPK1, PRKCA, PRKCB, PRKCG
GO:0032768	regulation of monooxygenase activity	4	2e-06	AKT1, EGFR, TERT, TNF
GO:0010243	response to organonitrogen compound	8	2.18e-06	AKT1, CDK1, EGFR, IGF1R, MAPK1, PRKCG, STAT3, TNF
GO:0007275	multicellular organism development	14	2.34e-06	AKT1, BCL2, CDK1, CDK2, CDK6, EGFR, HGF, MAP2K1, MAPK1, PRKCA, PRKCG, STAT3, TERT, TNF
GO:0045766	positive regulation of angiogenesis	5	2.37e-06	HGF, PRKCA, PRKCB, STAT3, TERT
GO:1901701	cellular response to oxygen-containing compound	8	2.54e-06	AKT1, CDK1, CDK2, EGFR, IGF1R, MAPK1, STAT3, TNF
GO:0042493	response to drug	8	2.61e-06	BCL2, CDK1, CDK2, EGFR, MAPK1, PRKCG, STAT3, TNF
GO:0032880	regulation of protein localization	8	2.62e-06	AKT1, BCL2, CDK1, EGFR, MAPK1, PRKCA, TERT, TNF
GO:0010038	response to metal ion	6	2.66e-06	AKT1, BCL2, CDK1, EGFR, MAPK1, TERT
GO:0007077	mitotic nuclear envelope disassembly	3	2.69e-06	CDK1, PRKCA, PRKCB
GO:0045597	positive regulation of cell differentiation	8	2.71e-06	AKT1, BCL2, HGF, MAP2K1, PRKCA, STAT3, TERT, TNF
GO:2000377	regulation of reactive oxygen species metabolic process	5	2.78e-06	AKT1, BCL2, EGFR, STAT3, TNF
GO:0010628	positive regulation of gene expression	10	3.16e-06	AKT1, CDK1, CDK2, EGFR, HGF, MAP2K1, MAPK1, STAT3, TERT, TNF
GO:0007569	cell aging	4	3.43e-06	BCL2, CDK1, MAP2K1, TERT
GO:0030278	regulation of ossification	5	3.78e-06	BCL2, CDK6, HGF, MAPK1, TNF
GO:1900182	positive regulation of protein localization to nucleus	4	3.99e-06	AKT1, CDK1, MAPK1, TERT
GO:0022603	regulation of anatomical structure morphogenesis	8	4e-06	BCL2, HGF, MAP2K1, PRKCA, PRKCB, STAT3, TERT, TNF
GO:0045787	positive regulation of cell cycle	6	4.49e-06	AKT1, CDK1, CDK2, EGFR, PRKCA, TERT
GO:0038127	ERBB signaling pathway	4	4.57e-06	AKT1, EGFR, MAPK1, PRKCA
GO:1901215	negative regulation of neuron death	5	4.71e-06	AKT1, BCL2, PRKCG, STAT3, TERT
GO:1901700	response to oxygen-containing compound	9	5.24e-06	AKT1, BCL2, CDK1, CDK2, EGFR, IGF1R, MAPK1, STAT3, TNF
GO:0010605	negative regulation of macromolecule metabolic process	11	5.38e-06	AKT1, CDK2, CDK6, EGFR, HGF, IGF1R, MAP2K1, PRKCG, STAT3, TERT, TNF
GO:0045893	positive regulation of transcription, DNA-templated	9	5.38e-06	AKT1, CDK2, EGFR, HGF, MAP2K1, MAPK1, STAT3, TERT, TNF
GO:0019219	regulation of nucleobase-containing compound metabolic process	13	5.83e-06	AKT1, CDK1, CDK2, EGFR, HGF, MAP2K1, MAPK1, PRKCA, PRKCB, PRKCG, STAT3, TERT, TNF
GO:0070920	regulation of production of small RNA involved in gene silencing by RNA	3	5.95e-06	EGFR, MAP2K1, TERT
GO:0048731	system development	13	5.96e-06	AKT1, BCL2, CDK1, CDK6, EGFR, HGF, MAP2K1, MAPK1, PRKCA, PRKCG, STAT3, TERT, TNF
GO:0048661	positive regulation of smooth muscle cell proliferation	4	6.42e-06	AKT1, EGFR, TERT, TNF
GO:0045596	negative regulation of cell differentiation	7	6.57e-06	BCL2, CDK6, EGFR, MAPK1, STAT3, TERT, TNF
GO:0060147	regulation of posttranscriptional gene silencing	4	6.63e-06	EGFR, MAP2K1, STAT3, TERT
GO:0060966	regulation of gene silencing by RNA	4	6.63e-06	EGFR, MAP2K1, STAT3, TERT
GO:0048585	negative regulation of response to stimulus	9	6.71e-06	AKT1, BCL2, CDK6, EGFR, HGF, IGF1R, PRKCB, TERT, TNF
GO:0010827	regulation of glucose transmembrane transport	4	7.47e-06	AKT1, PRKCB, TERT, TNF
GO:0070887	cellular response to chemical stimulus	11	7.87e-06	AKT1, BCL2, CDK1, CDK2, EGFR, HGF, IGF1R, MAPK1, STAT3, TERT, TNF
GO:0001892	embryonic placenta development	4	8.06e-06	AKT1, EGFR, MAP2K1, MAPK1
GO:0051248	negative regulation of protein metabolic process	8	8.12e-06	AKT1, CDK6, EGFR, HGF, IGF1R, PRKCG, STAT3, TNF
GO:0030154	cell differentiation	12	9.17e-06	AKT1, BCL2, CDK1, CDK6, EGFR, HGF, MAP2K1, MAPK1, PRKCA, STAT3, TERT, TNF
GO:0033554	cellular response to stress	9	9.47e-06	AKT1, BCL2, CDK1, CDK2, EGFR, MAP2K1, MAPK1, TERT, TNF
GO:0061024	membrane organization	7	9.47e-06	AKT1, BCL2, CDK1, EGFR, PRKCA, PRKCB, STAT3
GO:0050767	regulation of neurogenesis	7	9.5e-06	AKT1, BCL2, CDK1, HGF, MAP2K1, STAT3, TERT
GO:2000637	positive regulation of gene silencing by miRNA	3	9.59e-06	EGFR, MAP2K1, STAT3
GO:0010608	posttranscriptional regulation of gene expression	6	9.61e-06	AKT1, MAPK1, PRKCA, STAT3, TERT, TNF
GO:0031329	regulation of cellular catabolic process	7	1.05e-05	AKT1, BCL2, HGF, PRKCA, PRKCG, STAT3, TNF
GO:0031330	negative regulation of cellular catabolic process	5	1.06e-05	AKT1, BCL2, HGF, PRKCG, STAT3
GO:0006807	nitrogen compound metabolic process	16	1.26e-05	AKT1, BCL2, CDK1, CDK2, CDK6, EGFR, HGF, IGF1R, MAP2K1, MAPK1, PRKCA, PRKCB, PRKCG, STAT3, TERT, TNF
GO:0045930	negative regulation of mitotic cell cycle	5	1.26e-05	BCL2, CDK1, CDK2, EGFR, TNF
GO:0009968	negative regulation of signal transduction	8	1.34e-05	AKT1, BCL2, EGFR, HGF, IGF1R, PRKCB, TERT, TNF
GO:0007166	cell surface receptor signaling pathway	10	1.39e-05	AKT1, BCL2, EGFR, HGF, IGF1R, MAPK1, PRKCA, PRKCB, STAT3, TNF
GO:0045637	regulation of myeloid cell differentiation	5	1.39e-05	CDK6, PRKCA, PRKCB, STAT3, TNF
GO:0033138	positive regulation of peptidyl-serine phosphorylation	4	1.57e-05	AKT1, BCL2, EGFR, TNF
GO:0071417	cellular response to organonitrogen compound	6	1.57e-05	AKT1, EGFR, IGF1R, MAPK1, STAT3, TNF
GO:0032770	positive regulation of monooxygenase activity	3	1.79e-05	AKT1, TERT, TNF
GO:0071407	cellular response to organic cyclic compound	6	1.94e-05	AKT1, EGFR, MAPK1, STAT3, TERT, TNF
GO:0051172	negative regulation of nitrogen compound metabolic process	10	2.11e-05	AKT1, CDK2, CDK6, EGFR, HGF, IGF1R, PRKCG, STAT3, TERT, TNF
GO:0007049	cell cycle	8	2.39e-05	CDK1, CDK2, CDK6, HGF, MAP2K1, MAPK1, PRKCA, PRKCB
GO:0007417	central nervous system development	7	2.52e-05	AKT1, BCL2, CDK6, EGFR, MAP2K1, MAPK1, STAT3
GO:0030168	platelet activation	4	2.52e-05	MAPK1, PRKCA, PRKCB, PRKCG
GO:0031663	lipopolysaccharide-mediated signaling pathway	3	2.52e-05	AKT1, MAPK1, TNF
GO:0035270	endocrine system development	4	2.52e-05	AKT1, CDK6, MAP2K1, MAPK1
GO:0060674	placenta blood vessel development	3	2.52e-05	AKT1, MAP2K1, MAPK1
GO:0071276	cellular response to cadmium ion	3	2.52e-05	AKT1, EGFR, MAPK1
GO:0001936	regulation of endothelial cell proliferation	4	2.61e-05	AKT1, PRKCA, STAT3, TNF
GO:0044238	primary metabolic process	16	2.65e-05	AKT1, BCL2, CDK1, CDK2, CDK6, EGFR, HGF, IGF1R, MAP2K1, MAPK1, PRKCA, PRKCB, PRKCG, STAT3, TERT, TNF
GO:0002684	positive regulation of immune system process	7	2.85e-05	AKT1, BCL2, MAPK1, PRKCA, PRKCB, STAT3, TNF
GO:0051050	positive regulation of transport	7	3.05e-05	AKT1, BCL2, CDK1, EGFR, MAPK1, TERT, TNF
GO:0050853	B cell receptor signaling pathway	3	3.11e-05	BCL2, MAPK1, PRKCB
GO:0062013	positive regulation of small molecule metabolic process	4	3.15e-05	AKT1, CDK1, STAT3, TNF
GO:0045936	negative regulation of phosphate metabolic process	6	3.27e-05	AKT1, CDK6, HGF, IGF1R, STAT3, TNF
GO:0045740	positive regulation of DNA replication	3	3.31e-05	CDK1, CDK2, EGFR
GO:0035408	histone H3-T6 phosphorylation	2	3.33e-05	PRKCA, PRKCB
GO:0009605	response to external stimulus	9	3.44e-05	AKT1, BCL2, CDK6, EGFR, HGF, MAP2K1, MAPK1, PRKCA, TNF
GO:0006915	apoptotic process	7	3.45e-05	AKT1, BCL2, CDK1, MAPK1, PRKCA, PRKCB, TNF
GO:0031324	negative regulation of cellular metabolic process	10	3.45e-05	AKT1, BCL2, CDK2, CDK6, HGF, IGF1R, PRKCG, STAT3, TERT, TNF
GO:0035690	cellular response to drug	5	3.45e-05	CDK1, CDK2, EGFR, MAPK1, TNF
GO:0022414	reproductive process	8	3.53e-05	AKT1, BCL2, CDK1, CDK2, EGFR, MAP2K1, MAPK1, STAT3
GO:0000165	MAPK cascade	5	4.13e-05	EGFR, HGF, MAP2K1, MAPK1, TNF
GO:0031400	negative regulation of protein modification process	6	4.18e-05	AKT1, CDK6, HGF, IGF1R, PRKCG, TNF
GO:2000112	regulation of cellular macromolecule biosynthetic process	12	4.18e-05	AKT1, BCL2, CDK1, CDK2, EGFR, HGF, MAP2K1, MAPK1, PRKCB, STAT3, TERT, TNF
GO:0002682	regulation of immune system process	8	4.33e-05	AKT1, BCL2, CDK6, MAPK1, PRKCA, PRKCB, STAT3, TNF
GO:0031099	regeneration	4	5.34e-05	BCL2, CDK1, EGFR, HGF
GO:0000278	mitotic cell cycle	6	5.7e-05	CDK1, CDK2, CDK6, HGF, PRKCA, PRKCB
GO:0048538	thymus development	3	5.88e-05	BCL2, MAP2K1, MAPK1
GO:0070849	response to epidermal growth factor	3	5.88e-05	AKT1, EGFR, MAPK1
GO:0016043	cellular component organization	13	6.03e-05	AKT1, BCL2, CDK1, CDK2, EGFR, HGF, IGF1R, MAPK1, PRKCA, PRKCB, STAT3, TERT, TNF
GO:0050999	regulation of nitric-oxide synthase activity	3	6.2e-05	AKT1, EGFR, TERT
GO:0032269	negative regulation of cellular protein metabolic process	7	6.33e-05	AKT1, CDK6, HGF, IGF1R, PRKCG, STAT3, TNF
GO:0001775	cell activation	7	6.72e-05	BCL2, EGFR, MAPK1, PRKCA, PRKCB, PRKCG, STAT3
GO:0060711	labyrinthine layer development	3	6.94e-05	AKT1, MAP2K1, MAPK1
GO:0034097	response to cytokine	7	7.13e-05	AKT1, BCL2, HGF, MAPK1, PRKCA, STAT3, TNF
GO:0070201	regulation of establishment of protein localization	6	7.38e-05	BCL2, CDK1, EGFR, MAPK1, PRKCA, TNF
GO:0040008	regulation of growth	6	7.4e-05	AKT1, BCL2, CDK1, EGFR, STAT3, TNF
GO:0090170	regulation of Golgi inheritance	2	7.43e-05	MAP2K1, MAPK1
GO:0035094	response to nicotine	3	7.63e-05	BCL2, MAPK1, TNF
GO:0008285	negative regulation of cell population proliferation	6	7.7e-05	BCL2, CDK6, MAP2K1, STAT3, TERT, TNF
GO:0046328	regulation of JNK cascade	4	7.73e-05	AKT1, EGFR, IGF1R, TNF
GO:0060429	epithelium development	7	7.85e-05	AKT1, BCL2, CDK1, CDK6, EGFR, MAP2K1, MAPK1
GO:0030030	cell projection organization	7	8.35e-05	AKT1, BCL2, CDK1, EGFR, IGF1R, MAPK1, PRKCA
GO:0050679	positive regulation of epithelial cell proliferation	4	9.13e-05	AKT1, EGFR, PRKCA, STAT3
GO:0065008	regulation of biological quality	11	9.71e-05	AKT1, BCL2, CDK6, EGFR, MAPK1, PRKCA, PRKCB, PRKCG, STAT3, TERT, TNF
GO:1904951	positive regulation of establishment of protein localization	5	9.71e-05	BCL2, CDK1, EGFR, MAPK1, TNF
GO:0051241	negative regulation of multicellular organismal process	7	9.78e-05	BCL2, CDK6, EGFR, HGF, STAT3, TERT, TNF
GO:0071241	cellular response to inorganic substance	4	0.0001	AKT1, CDK2, EGFR, MAPK1
GO:0048608	reproductive structure development	5	0.00011	AKT1, BCL2, EGFR, MAP2K1, MAPK1
GO:0009888	tissue development	8	0.00012	AKT1, BCL2, CDK1, CDK6, EGFR, HGF, MAP2K1, MAPK1
GO:0018108	peptidyl-tyrosine phosphorylation	4	0.00012	EGFR, HGF, IGF1R, MAP2K1
GO:0032101	regulation of response to external stimulus	6	0.00012	EGFR, HGF, MAP2K1, PRKCA, PRKCG, TNF
GO:0040011	locomotion	7	0.00012	CDK1, EGFR, HGF, MAP2K1, MAPK1, PRKCA, TNF
GO:0048568	embryonic organ development	5	0.00012	AKT1, EGFR, MAP2K1, MAPK1, TNF
GO:0071310	cellular response to organic substance	9	0.00012	AKT1, BCL2, EGFR, HGF, IGF1R, MAPK1, STAT3, TERT, TNF
GO:0006974	cellular response to DNA damage stimulus	6	0.00013	AKT1, BCL2, CDK1, CDK2, MAPK1, TNF
GO:0046777	protein autophosphorylation	4	0.00013	AKT1, EGFR, IGF1R, PRKCG
GO:0048513	animal organ development	10	0.00013	AKT1, BCL2, CDK1, CDK6, EGFR, HGF, MAP2K1, MAPK1, STAT3, TNF
GO:0060440	trachea formation	2	0.00013	MAP2K1, MAPK1
GO:0070141	response to UV-A	2	0.00013	AKT1, EGFR
GO:0070374	positive regulation of ERK1 and ERK2 cascade	4	0.00013	EGFR, MAP2K1, PRKCA, TNF
GO:0051896	regulation of protein kinase B signaling	4	0.00014	AKT1, EGFR, HGF, TNF
GO:0046324	regulation of glucose import	3	0.00016	AKT1, TERT, TNF
GO:0051128	regulation of cellular component organization	9	0.00016	AKT1, BCL2, EGFR, HGF, IGF1R, MAP2K1, MAPK1, PRKCG, TNF
GO:0035295	tube development	6	0.00018	BCL2, EGFR, MAP2K1, MAPK1, PRKCA, TNF
GO:0042060	wound healing	5	0.00018	EGFR, MAPK1, PRKCA, PRKCB, PRKCG
GO:0042326	negative regulation of phosphorylation	5	0.00018	AKT1, CDK6, HGF, IGF1R, STAT3
GO:0009636	response to toxic substance	5	0.00019	BCL2, CDK1, MAPK1, STAT3, TNF
GO:0030279	negative regulation of ossification	3	0.00019	BCL2, CDK6, TNF
GO:0060020	Bergmann glial cell differentiation	2	0.00019	MAP2K1, MAPK1
GO:0060693	regulation of branching involved in salivary gland morphogenesis	2	0.00019	HGF, TNF
GO:1903800	positive regulation of production of miRNAs involved in gene silencing by miRNA	2	0.00019	EGFR, MAP2K1
GO:0010507	negative regulation of autophagy	3	0.00021	AKT1, BCL2, HGF
GO:0051252	regulation of RNA metabolic process	11	0.00021	AKT1, CDK2, EGFR, HGF, MAP2K1, MAPK1, PRKCA, PRKCB, STAT3, TERT, TNF
GO:1900407	regulation of cellular response to oxidative stress	3	0.00021	AKT1, HGF, TNF
GO:0033993	response to lipid	6	0.00022	AKT1, BCL2, EGFR, MAPK1, STAT3, TNF
GO:1903426	regulation of reactive oxygen species biosynthetic process	3	0.00024	AKT1, STAT3, TNF
GO:0009725	response to hormone	6	0.00026	AKT1, BCL2, EGFR, IGF1R, STAT3, TNF
GO:0031100	animal organ regeneration	3	0.00026	CDK1, EGFR, HGF
GO:0009887	animal organ morphogenesis	6	0.00028	BCL2, EGFR, MAP2K1, MAPK1, STAT3, TNF
GO:0050673	epithelial cell proliferation	3	0.00029	MAP2K1, MAPK1, TNF
GO:0045927	positive regulation of growth	4	0.0003	AKT1, BCL2, CDK1, EGFR
GO:0000079	regulation of cyclin-dependent protein serine/threonine kinase activity	3	0.00032	AKT1, CDK6, EGFR
GO:0009719	response to endogenous stimulus	7	0.00032	AKT1, BCL2, EGFR, IGF1R, MAPK1, STAT3, TNF
GO:0022402	cell cycle process	6	0.00032	CDK1, CDK2, CDK6, MAP2K1, PRKCA, PRKCB
GO:0034762	regulation of transmembrane transport	5	0.00032	AKT1, BCL2, PRKCB, TERT, TNF
GO:0097011	cellular response to granulocyte macrophage colony-stimulating factor stimulus	2	0.00032	AKT1, MAPK1
GO:0006928	movement of cell or subcellular component	7	0.00033	CDK1, EGFR, HGF, MAP2K1, MAPK1, PRKCA, TNF
GO:0001938	positive regulation of endothelial cell proliferation	3	0.00034	AKT1, PRKCA, STAT3
GO:0045639	positive regulation of myeloid cell differentiation	3	0.00034	PRKCA, STAT3, TNF
GO:0007610	behavior	5	0.00036	BCL2, EGFR, MAPK1, PRKCG, STAT3
GO:0021782	glial cell development	3	0.00036	AKT1, CDK6, EGFR
GO:0022612	gland morphogenesis	3	0.0004	BCL2, EGFR, TNF
GO:2000379	positive regulation of reactive oxygen species metabolic process	3	0.0004	AKT1, EGFR, TNF
GO:0002363	alpha-beta T cell lineage commitment	2	0.00041	BCL2, STAT3
GO:0030182	neuron differentiation	6	0.00041	BCL2, EGFR, MAP2K1, MAPK1, PRKCA, STAT3
GO:0042635	positive regulation of hair cycle	2	0.00041	TERT, TNF
GO:0014066	regulation of phosphatidylinositol 3-kinase signaling	3	0.00042	EGFR, HGF, MAPK1
GO:0043467	regulation of generation of precursor metabolites and energy	3	0.00042	AKT1, CDK1, STAT3
GO:1903047	mitotic cell cycle process	5	0.00042	CDK1, CDK2, CDK6, PRKCA, PRKCB
GO:2000134	negative regulation of G1/S transition of mitotic cell cycle	3	0.00042	BCL2, CDK1, CDK2
GO:0009653	anatomical structure morphogenesis	8	0.00043	BCL2, EGFR, HGF, MAP2K1, MAPK1, PRKCA, STAT3, TNF
GO:0071345	cellular response to cytokine stimulus	6	0.00043	AKT1, BCL2, HGF, MAPK1, STAT3, TNF
GO:0043369	CD4-positive or CD8-positive, alpha-beta T cell lineage commitment	2	0.00045	BCL2, STAT3
GO:0048009	insulin-like growth factor receptor signaling pathway	2	0.00045	AKT1, IGF1R
GO:0048534	hematopoietic or lymphoid organ development	5	0.00045	BCL2, MAP2K1, MAPK1, STAT3, TNF
GO:0006606	protein import into nucleus	3	0.00047	AKT1, STAT3, TNF
GO:0051179	localization	12	0.00047	AKT1, BCL2, CDK1, CDK2, EGFR, HGF, MAP2K1, MAPK1, PRKCB, STAT3, TERT, TNF
GO:0072593	reactive oxygen species metabolic process	3	0.00049	AKT1, BCL2, EGFR
GO:0048638	regulation of developmental growth	4	0.00054	AKT1, BCL2, CDK1, STAT3
GO:0048468	cell development	7	0.00055	AKT1, BCL2, CDK1, CDK6, EGFR, MAPK1, PRKCA
GO:0071496	cellular response to external stimulus	4	0.00056	AKT1, BCL2, EGFR, MAPK1
GO:2000010	positive regulation of protein localization to cell surface	2	0.00056	AKT1, TNF
GO:0045667	regulation of osteoblast differentiation	3	0.00061	CDK6, HGF, TNF
GO:0030155	regulation of cell adhesion	5	0.00062	AKT1, BCL2, CDK6, PRKCA, TNF
GO:0045780	positive regulation of bone resorption	2	0.00062	EGFR, PRKCA
GO:0051223	regulation of protein transport	5	0.00062	CDK1, EGFR, MAPK1, PRKCA, TNF
GO:0090201	negative regulation of release of cytochrome c from mitochondria	2	0.00062	AKT1, HGF
GO:2000773	negative regulation of cellular senescence	2	0.00062	CDK6, TERT
GO:0000902	cell morphogenesis	5	0.00063	BCL2, EGFR, HGF, MAPK1, PRKCA
GO:0120036	plasma membrane bounded cell projection organization	6	0.00063	BCL2, CDK1, EGFR, IGF1R, MAPK1, PRKCA
GO:0002761	regulation of myeloid leukocyte differentiation	3	0.00065	CDK6, PRKCA, TNF
GO:0034763	negative regulation of transmembrane transport	3	0.00065	AKT1, PRKCB, TNF
GO:2000641	regulation of early endosome to late endosome transport	2	0.00066	MAP2K1, MAPK1
GO:1905477	positive regulation of protein localization to membrane	3	0.00067	AKT1, BCL2, EGFR
GO:0006417	regulation of translation	4	0.00069	AKT1, MAPK1, STAT3, TNF
GO:0010829	negative regulation of glucose transmembrane transport	2	0.00073	PRKCB, TNF
GO:0033365	protein localization to organelle	5	0.00073	AKT1, CDK1, STAT3, TERT, TNF
GO:0043123	positive regulation of I-kappaB kinase/NF-kappaB signaling	3	0.00074	AKT1, PRKCB, TNF
GO:0019221	cytokine-mediated signaling pathway	5	0.00075	AKT1, BCL2, HGF, STAT3, TNF
GO:0006355	regulation of transcription, DNA-templated	10	0.00076	AKT1, CDK2, EGFR, HGF, MAP2K1, MAPK1, PRKCB, STAT3, TERT, TNF
GO:0010256	endomembrane system organization	4	0.00076	AKT1, CDK1, PRKCA, PRKCB
GO:0051000	positive regulation of nitric-oxide synthase activity	2	0.00077	AKT1, TERT
GO:0060716	labyrinthine layer blood vessel development	2	0.00077	AKT1, MAPK1
GO:0048565	digestive tract development	3	0.00079	BCL2, EGFR, TNF
GO:0051704	multi-organism process	8	0.00082	AKT1, BCL2, CDK1, CDK6, EGFR, MAPK1, STAT3, TNF
GO:0045944	positive regulation of transcription by RNA polymerase II	6	0.00085	AKT1, EGFR, HGF, STAT3, TERT, TNF
GO:0048762	mesenchymal cell differentiation	3	0.00085	BCL2, HGF, MAPK1
GO:0050995	negative regulation of lipid catabolic process	2	0.0009	AKT1, TNF
GO:0060322	head development	5	0.00093	BCL2, CDK6, EGFR, MAP2K1, MAPK1
GO:0051130	positive regulation of cellular component organization	6	0.00094	BCL2, HGF, IGF1R, MAP2K1, MAPK1, TNF
GO:0030878	thyroid gland development	2	0.00097	MAP2K1, MAPK1
GO:0051222	positive regulation of protein transport	4	0.00098	CDK1, EGFR, MAPK1, TNF
GO:0043524	negative regulation of neuron apoptotic process	3	0.00099	BCL2, PRKCG, TERT
GO:0051384	response to glucocorticoid	3	0.00099	BCL2, EGFR, TNF
GO:0009411	response to UV	3	0.001	AKT1, BCL2, EGFR
GO:0033043	regulation of organelle organization	6	0.001	AKT1, BCL2, HGF, MAP2K1, MAPK1, TNF
GO:0042176	regulation of protein catabolic process	4	0.001	AKT1, EGFR, PRKCG, TNF
GO:0071456	cellular response to hypoxia	3	0.001	AKT1, BCL2, TERT
GO:0045785	positive regulation of cell adhesion	4	0.0011	AKT1, CDK6, PRKCA, TNF
GO:0045931	positive regulation of mitotic cell cycle	3	0.0011	CDK1, PRKCA, TERT
GO:1902895	positive regulation of pri-miRNA transcription by RNA polymerase II	2	0.0011	STAT3, TERT
GO:0002376	immune system process	8	0.0012	AKT1, BCL2, IGF1R, MAP2K1, MAPK1, PRKCB, STAT3, TNF
GO:0010389	regulation of G2/M transition of mitotic cell cycle	3	0.0012	CDK1, CDK2, CDK6
GO:0010821	regulation of mitochondrion organization	3	0.0012	AKT1, BCL2, HGF
GO:0030162	regulation of proteolysis	5	0.0012	AKT1, HGF, PRKCG, STAT3, TNF
GO:0052548	regulation of endopeptidase activity	4	0.0012	AKT1, HGF, STAT3, TNF
GO:0070371	ERK1 and ERK2 cascade	2	0.0012	MAP2K1, MAPK1
GO:0070570	regulation of neuron projection regeneration	2	0.0012	HGF, MAP2K1
GO:0006996	organelle organization	9	0.0013	AKT1, BCL2, CDK1, CDK2, PRKCA, PRKCB, STAT3, TERT, TNF
GO:0007435	salivary gland morphogenesis	2	0.0013	EGFR, TNF
GO:0051090	regulation of DNA-binding transcription factor activity	4	0.0013	AKT1, MAPK1, PRKCB, TNF
GO:0051897	positive regulation of protein kinase B signaling	3	0.0013	EGFR, HGF, TNF
GO:0072594	establishment of protein localization to organelle	4	0.0013	AKT1, STAT3, TERT, TNF
GO:0014002	astrocyte development	2	0.0014	CDK6, EGFR
GO:0030307	positive regulation of cell growth	3	0.0014	AKT1, BCL2, EGFR
GO:0001933	negative regulation of protein phosphorylation	4	0.0015	AKT1, CDK6, HGF, IGF1R
GO:0007005	mitochondrion organization	4	0.0015	AKT1, BCL2, STAT3, TERT
GO:0030212	hyaluronan metabolic process	2	0.0015	AKT1, HGF
GO:0030324	lung development	3	0.0015	EGFR, MAP2K1, MAPK1
GO:0038128	ERBB2 signaling pathway	2	0.0015	EGFR, PRKCA
GO:0048639	positive regulation of developmental growth	3	0.0015	AKT1, BCL2, CDK1
GO:0060416	response to growth hormone	2	0.0015	AKT1, STAT3
GO:0008625	extrinsic apoptotic signaling pathway via death domain receptors	2	0.0016	BCL2, TNF
GO:1904707	positive regulation of vascular smooth muscle cell proliferation	2	0.0016	TERT, TNF
GO:0014065	phosphatidylinositol 3-kinase signaling	2	0.0017	AKT1, IGF1R
GO:0043029	T cell homeostasis	2	0.0017	AKT1, BCL2
GO:0043086	negative regulation of catalytic activity	5	0.0017	AKT1, CDK6, HGF, IGF1R, TNF
GO:0045737	positive regulation of cyclin-dependent protein serine/threonine kinase activity	2	0.0017	AKT1, EGFR
GO:0045907	positive regulation of vasoconstriction	2	0.0017	AKT1, EGFR
GO:0072359	circulatory system development	5	0.0017	AKT1, CDK1, MAP2K1, MAPK1, PRKCA
GO:0090322	regulation of superoxide metabolic process	2	0.0017	EGFR, TNF
GO:1903580	positive regulation of ATP metabolic process	2	0.0017	CDK1, STAT3
GO:0031641	regulation of myelination	2	0.0018	AKT1, HGF
GO:0043243	positive regulation of protein complex disassembly	2	0.0018	IGF1R, TNF
GO:0043491	protein kinase B signaling	2	0.0018	AKT1, TNF
GO:0048812	neuron projection morphogenesis	4	0.0018	BCL2, EGFR, MAPK1, PRKCA
GO:0051051	negative regulation of transport	4	0.0018	AKT1, BCL2, PRKCB, TNF
GO:0110111	negative regulation of animal organ morphogenesis	2	0.0018	BCL2, TNF
GO:0014911	positive regulation of smooth muscle cell migration	2	0.0019	BCL2, TERT
GO:0031667	response to nutrient levels	4	0.0019	AKT1, BCL2, EGFR, MAPK1
GO:0051707	response to other organism	5	0.0019	AKT1, BCL2, CDK6, MAPK1, TNF
GO:1901031	regulation of response to reactive oxygen species	2	0.0019	HGF, TNF
GO:0001568	blood vessel development	4	0.002	AKT1, MAP2K1, MAPK1, PRKCA
GO:0031018	endocrine pancreas development	2	0.0021	AKT1, CDK6
GO:0032715	negative regulation of interleukin-6 production	2	0.0021	HGF, TNF
GO:0006357	regulation of transcription by RNA polymerase II	8	0.0022	AKT1, CDK2, EGFR, HGF, PRKCB, STAT3, TERT, TNF
GO:0006954	inflammatory response	4	0.0022	AKT1, EGFR, STAT3, TNF
GO:0008104	protein localization	7	0.0022	AKT1, CDK1, EGFR, PRKCB, STAT3, TERT, TNF
GO:0034613	cellular protein localization	6	0.0022	AKT1, CDK1, EGFR, STAT3, TERT, TNF
GO:0051234	establishment of localization	10	0.0022	AKT1, BCL2, CDK2, EGFR, HGF, MAPK1, PRKCB, STAT3, TERT, TNF
GO:0060627	regulation of vesicle-mediated transport	4	0.0022	MAP2K1, MAPK1, PRKCG, TNF
GO:0071229	cellular response to acid chemical	3	0.0022	AKT1, EGFR, TNF
GO:0071356	cellular response to tumor necrosis factor	3	0.0022	AKT1, MAPK1, TNF
GO:0071363	cellular response to growth factor stimulus	4	0.0022	AKT1, EGFR, HGF, MAPK1
GO:0071364	cellular response to epidermal growth factor stimulus	2	0.0022	AKT1, EGFR
GO:1905953	negative regulation of lipid localization	2	0.0022	AKT1, TNF
GO:0071396	cellular response to lipid	4	0.0023	AKT1, EGFR, MAPK1, TNF
GO:0006935	chemotaxis	4	0.0024	HGF, MAP2K1, MAPK1, PRKCA
GO:0042307	positive regulation of protein import into nucleus	2	0.0024	CDK1, MAPK1
GO:0045429	positive regulation of nitric oxide biosynthetic process	2	0.0024	AKT1, TNF
GO:0090276	regulation of peptide hormone secretion	3	0.0024	EGFR, PRKCA, TNF
GO:1904407	positive regulation of nitric oxide metabolic process	2	0.0024	AKT1, TNF
GO:0046326	positive regulation of glucose import	2	0.0025	AKT1, TERT
GO:0048678	response to axon injury	2	0.0025	BCL2, CDK1
GO:2000027	regulation of animal organ morphogenesis	3	0.0025	BCL2, HGF, TNF
GO:0043281	regulation of cysteine-type endopeptidase activity involved in apoptotic process	3	0.0026	AKT1, HGF, TNF
GO:0043393	regulation of protein binding	3	0.0026	AKT1, BCL2, TERT
GO:0045668	negative regulation of osteoblast differentiation	2	0.0026	CDK6, TNF
GO:0048870	cell motility	5	0.0026	CDK1, EGFR, HGF, MAP2K1, TNF
GO:0060425	lung morphogenesis	2	0.0026	MAP2K1, MAPK1
GO:1903202	negative regulation of oxidative stress-induced cell death	2	0.0026	AKT1, HGF
GO:0001503	ossification	3	0.0027	AKT1, BCL2, EGFR
GO:0007423	sensory organ development	4	0.0027	BCL2, EGFR, MAPK1, STAT3
GO:0044057	regulation of system process	4	0.0027	AKT1, EGFR, HGF, PRKCA
GO:0045646	regulation of erythrocyte differentiation	2	0.0027	CDK6, STAT3
GO:0009059	macromolecule biosynthetic process	9	0.0029	AKT1, CDK1, CDK2, EGFR, MAPK1, PRKCB, STAT3, TERT, TNF
GO:0038083	peptidyl-tyrosine autophosphorylation	2	0.0029	EGFR, IGF1R
GO:0045184	establishment of protein localization	6	0.0029	AKT1, EGFR, PRKCB, STAT3, TERT, TNF
GO:0046622	positive regulation of organ growth	2	0.0029	AKT1, CDK1
GO:0048546	digestive tract morphogenesis	2	0.0029	BCL2, EGFR
GO:0060324	face development	2	0.0029	MAP2K1, MAPK1
GO:0035194	posttranscriptional gene silencing by RNA	2	0.0031	STAT3, TERT
GO:0042592	homeostatic process	6	0.0031	AKT1, BCL2, EGFR, MAPK1, STAT3, TERT
GO:2000378	negative regulation of reactive oxygen species metabolic process	2	0.0031	BCL2, STAT3
GO:0002763	positive regulation of myeloid leukocyte differentiation	2	0.0033	PRKCA, TNF
GO:0007173	epidermal growth factor receptor signaling pathway	2	0.0033	AKT1, EGFR
GO:0097305	response to alcohol	3	0.0033	AKT1, CDK1, STAT3
GO:0007611	learning or memory	3	0.0034	EGFR, MAPK1, PRKCG
GO:0045739	positive regulation of DNA repair	2	0.0034	EGFR, PRKCG
GO:0050730	regulation of peptidyl-tyrosine phosphorylation	3	0.0034	EGFR, HGF, STAT3
GO:1903078	positive regulation of protein localization to plasma membrane	2	0.0034	AKT1, EGFR
GO:0048146	positive regulation of fibroblast proliferation	2	0.0035	CDK6, EGFR
GO:0048878	chemical homeostasis	5	0.0035	AKT1, BCL2, EGFR, MAPK1, STAT3
GO:0051276	chromosome organization	5	0.0035	CDK1, CDK2, PRKCA, PRKCB, TERT
GO:0043536	positive regulation of blood vessel endothelial cell migration	2	0.0036	AKT1, PRKCA
GO:0061180	mammary gland epithelium development	2	0.0036	AKT1, MAPK1
GO:0016032	viral process	4	0.0037	CDK1, EGFR, MAPK1, STAT3
GO:0071375	cellular response to peptide hormone stimulus	3	0.0037	AKT1, IGF1R, STAT3
GO:0006955	immune response	6	0.0038	BCL2, IGF1R, MAPK1, PRKCB, STAT3, TNF
GO:0031647	regulation of protein stability	3	0.0039	BCL2, MAPK1, TERT
GO:0034502	protein localization to chromosome	2	0.0039	CDK1, TERT
GO:0051091	positive regulation of DNA-binding transcription factor activity	3	0.0039	AKT1, PRKCB, TNF
GO:0006469	negative regulation of protein kinase activity	3	0.004	AKT1, CDK6, IGF1R
GO:0006977	DNA damage response, signal transduction by p53 class mediator resulting in cell cycle arrest	2	0.004	CDK1, CDK2
GO:0032870	cellular response to hormone stimulus	4	0.004	AKT1, EGFR, IGF1R, STAT3
GO:0044772	mitotic cell cycle phase transition	3	0.004	CDK1, CDK2, CDK6
GO:0008637	apoptotic mitochondrial changes	2	0.0041	AKT1, BCL2
GO:0050778	positive regulation of immune response	4	0.0041	BCL2, MAPK1, PRKCB, TNF
GO:0071230	cellular response to amino acid stimulus	2	0.0041	EGFR, TNF
GO:0009628	response to abiotic stimulus	5	0.0042	AKT1, BCL2, EGFR, TERT, TNF
GO:0045664	regulation of neuron differentiation	4	0.0042	AKT1, BCL2, HGF, MAP2K1
GO:0014031	mesenchymal cell development	2	0.0043	BCL2, MAPK1
GO:0009615	response to virus	3	0.0046	BCL2, CDK6, TNF
GO:1901992	positive regulation of mitotic cell cycle phase transition	2	0.0046	CDK1, TERT
GO:0090068	positive regulation of cell cycle process	3	0.0047	CDK1, CDK2, TERT
GO:0033555	multicellular organismal response to stress	2	0.0049	BCL2, PRKCG
GO:0006970	response to osmotic stress	2	0.005	EGFR, TNF
GO:0010629	negative regulation of gene expression	6	0.005	AKT1, CDK2, MAP2K1, STAT3, TERT, TNF
GO:0031397	negative regulation of protein ubiquitination	2	0.005	AKT1, PRKCG
GO:0051881	regulation of mitochondrial membrane potential	2	0.005	AKT1, BCL2
GO:2000573	positive regulation of DNA biosynthetic process	2	0.005	HGF, MAPK1
GO:0022607	cellular component assembly	7	0.0051	BCL2, CDK1, CDK2, IGF1R, PRKCA, TERT, TNF
GO:0040014	regulation of multicellular organism growth	2	0.0051	BCL2, STAT3
GO:0045844	positive regulation of striated muscle tissue development	2	0.0051	BCL2, CDK1
GO:0050764	regulation of phagocytosis	2	0.0051	PRKCG, TNF
GO:1901224	positive regulation of NIK/NF-kappaB signaling	2	0.0051	EGFR, TNF
GO:0007249	I-kappaB kinase/NF-kappaB signaling	2	0.0052	AKT1, TNF
GO:0001942	hair follicle development	2	0.0053	BCL2, EGFR
GO:0007420	brain development	4	0.0053	BCL2, CDK6, EGFR, MAP2K1
GO:0008630	intrinsic apoptotic signaling pathway in response to DNA damage	2	0.0053	BCL2, TNF
GO:0030855	epithelial cell differentiation	4	0.0053	AKT1, CDK1, CDK6, MAP2K1
GO:0032103	positive regulation of response to external stimulus	3	0.0053	EGFR, PRKCA, TNF
GO:0046902	regulation of mitochondrial membrane permeability	2	0.0053	BCL2, STAT3
GO:0046889	positive regulation of lipid biosynthetic process	2	0.0055	AKT1, TNF
GO:0097190	apoptotic signaling pathway	3	0.0055	BCL2, PRKCA, TNF
GO:0010721	negative regulation of cell development	3	0.0056	BCL2, STAT3, TERT
GO:0046677	response to antibiotic	3	0.0059	BCL2, CDK1, STAT3
GO:0007098	centrosome cycle	2	0.0061	CDK1, CDK2
GO:0071260	cellular response to mechanical stimulus	2	0.0061	AKT1, EGFR
GO:0002521	leukocyte differentiation	3	0.0063	BCL2, STAT3, TNF
GO:0042058	regulation of epidermal growth factor receptor signaling pathway	2	0.0063	AKT1, EGFR
GO:0008286	insulin receptor signaling pathway	2	0.0066	AKT1, IGF1R
GO:0043331	response to dsRNA	2	0.0066	MAPK1, TERT
GO:0030641	regulation of cellular pH	2	0.0067	BCL2, MAPK1
GO:0045833	negative regulation of lipid metabolic process	2	0.0068	AKT1, TNF
GO:0045069	regulation of viral genome replication	2	0.007	BCL2, TNF
GO:0032386	regulation of intracellular transport	3	0.0074	CDK1, MAP2K1, MAPK1
GO:0006952	defense response	5	0.0075	AKT1, BCL2, EGFR, STAT3, TNF
GO:0045666	positive regulation of neuron differentiation	3	0.0075	BCL2, HGF, MAP2K1
GO:0050727	regulation of inflammatory response	3	0.0075	EGFR, HGF, TNF
GO:0051336	regulation of hydrolase activity	5	0.0075	AKT1, EGFR, HGF, STAT3, TNF
GO:1901655	cellular response to ketone	2	0.0076	AKT1, EGFR
GO:0008593	regulation of Notch signaling pathway	2	0.0077	EGFR, STAT3
GO:0043154	negative regulation of cysteine-type endopeptidase activity involved in apoptotic process	2	0.0077	AKT1, HGF
GO:0007409	axonogenesis	3	0.0079	BCL2, MAPK1, PRKCA
GO:0046718	viral entry into host cell	2	0.0079	CDK1, EGFR
GO:0051345	positive regulation of hydrolase activity	4	0.0079	AKT1, EGFR, STAT3, TNF
GO:0045862	positive regulation of proteolysis	3	0.008	AKT1, STAT3, TNF
GO:0062014	negative regulation of small molecule metabolic process	2	0.008	AKT1, STAT3
GO:0045861	negative regulation of proteolysis	3	0.0081	AKT1, HGF, PRKCG
GO:2001243	negative regulation of intrinsic apoptotic signaling pathway	2	0.0085	AKT1, BCL2
GO:0019953	sexual reproduction	4	0.0086	AKT1, BCL2, CDK1, STAT3
GO:0046649	lymphocyte activation	3	0.0086	BCL2, PRKCB, STAT3
GO:0022407	regulation of cell-cell adhesion	3	0.009	AKT1, PRKCA, TNF
GO:0014013	regulation of gliogenesis	2	0.0093	CDK1, TERT
GO:0035051	cardiocyte differentiation	2	0.0094	CDK1, MAPK1
GO:0043588	skin development	3	0.0094	BCL2, EGFR, MAP2K1
GO:0043900	regulation of multi-organism process	3	0.0094	BCL2, PRKCA, TNF
GO:0046854	phosphatidylinositol phosphorylation	2	0.0094	EGFR, HGF
GO:0022037	metencephalon development	2	0.0095	BCL2, MAP2K1
GO:0001952	regulation of cell-matrix adhesion	2	0.0097	BCL2, CDK6
GO:0051403	stress-activated MAPK cascade	2	0.01	MAPK1, TNF
GO:0034645	cellular macromolecule biosynthetic process	8	0.0102	AKT1, CDK1, CDK2, EGFR, MAPK1, PRKCB, STAT3, TERT
GO:0016477	cell migration	4	0.0104	CDK1, EGFR, HGF, TNF
GO:0045727	positive regulation of translation	2	0.0105	MAPK1, TNF
GO:0042542	response to hydrogen peroxide	2	0.0108	BCL2, CDK1
GO:0006006	glucose metabolic process	2	0.011	AKT1, TNF
GO:0043488	regulation of mRNA stability	2	0.011	AKT1, PRKCA
GO:0007268	chemical synaptic transmission	3	0.0113	AKT1, MAPK1, PRKCG
GO:0008544	epidermis development	3	0.0113	BCL2, EGFR, MAP2K1
GO:0007155	cell adhesion	4	0.0116	BCL2, EGFR, PRKCA, TNF
GO:0045598	regulation of fat cell differentiation	2	0.0121	AKT1, TNF
GO:0050729	positive regulation of inflammatory response	2	0.0121	EGFR, TNF
GO:0042177	negative regulation of protein catabolic process	2	0.0122	EGFR, PRKCG
GO:0098609	cell-cell adhesion	3	0.0122	BCL2, EGFR, TNF
GO:0050680	negative regulation of epithelial cell proliferation	2	0.0124	CDK6, TNF
GO:0060359	response to ammonium ion	2	0.0124	MAPK1, PRKCG
GO:0000082	G1/S transition of mitotic cell cycle	2	0.0126	CDK2, CDK6
GO:0000086	G2/M transition of mitotic cell cycle	2	0.0126	CDK1, CDK2
GO:0001889	liver development	2	0.0126	EGFR, HGF
GO:0050708	regulation of protein secretion	3	0.0126	EGFR, PRKCA, TNF
GO:0030177	positive regulation of Wnt signaling pathway	2	0.013	EGFR, TERT
GO:0032355	response to estradiol	2	0.013	EGFR, STAT3
GO:0050806	positive regulation of synaptic transmission	2	0.013	EGFR, MAPK1
GO:1901796	regulation of signal transduction by p53 class mediator	2	0.0135	AKT1, CDK2
GO:0051346	negative regulation of hydrolase activity	3	0.0136	AKT1, HGF, TNF
GO:0071901	negative regulation of protein serine/threonine kinase activity	2	0.0136	AKT1, CDK6
GO:0045321	leukocyte activation	4	0.0137	BCL2, MAPK1, PRKCB, STAT3
GO:0010975	regulation of neuron projection development	3	0.0139	AKT1, HGF, MAP2K1
GO:0010675	regulation of cellular carbohydrate metabolic process	2	0.014	AKT1, STAT3
GO:0045471	response to ethanol	2	0.0142	CDK1, STAT3
GO:0034329	cell junction assembly	2	0.0144	BCL2, PRKCA
GO:0009267	cellular response to starvation	2	0.0147	BCL2, MAPK1
GO:0051092	positive regulation of NF-kappaB transcription factor activity	2	0.0156	PRKCB, TNF
GO:0043271	negative regulation of ion transport	2	0.0158	AKT1, BCL2
GO:0042113	B cell activation	2	0.0162	BCL2, PRKCB
GO:0007010	cytoskeleton organization	4	0.0166	BCL2, CDK1, CDK2, TNF
GO:1903034	regulation of response to wounding	2	0.0168	MAP2K1, PRKCA
GO:0007050	cell cycle arrest	2	0.017	CDK6, MAP2K1
GO:0051235	maintenance of location	2	0.0171	AKT1, TNF
GO:0051301	cell division	3	0.0171	CDK1, CDK2, CDK6
GO:0007507	heart development	3	0.0173	CDK1, MAP2K1, MAPK1
GO:0043409	negative regulation of MAPK cascade	2	0.0187	AKT1, IGF1R
GO:0010950	positive regulation of endopeptidase activity	2	0.0188	STAT3, TNF
GO:0050865	regulation of cell activation	3	0.0191	AKT1, BCL2, PRKCA
GO:0021543	pallium development	2	0.0196	CDK6, EGFR
GO:1902532	negative regulation of intracellular signal transduction	3	0.0198	AKT1, BCL2, IGF1R
GO:0045216	cell-cell junction organization	2	0.0207	BCL2, PRKCA
GO:0042593	glucose homeostasis	2	0.0209	AKT1, STAT3
GO:0050796	regulation of insulin secretion	2	0.0216	PRKCA, TNF
GO:0007565	female pregnancy	2	0.0234	AKT1, BCL2
GO:0050731	positive regulation of peptidyl-tyrosine phosphorylation	2	0.0234	HGF, STAT3
GO:0010638	positive regulation of organelle organization	3	0.0237	BCL2, MAPK1, TNF
GO:0051146	striated muscle cell differentiation	2	0.0237	AKT1, CDK1
GO:0007267	cell-cell signaling	4	0.0239	AKT1, HGF, MAPK1, PRKCG
GO:0006810	transport	8	0.0241	AKT1, BCL2, CDK2, HGF, MAPK1, PRKCB, STAT3, TNF
GO:0061136	regulation of proteasomal protein catabolic process	2	0.0243	AKT1, PRKCG
GO:0097237	cellular response to toxic substance	2	0.0267	CDK1, TNF
GO:1903039	positive regulation of leukocyte cell-cell adhesion	2	0.0284	AKT1, TNF
GO:0006260	DNA replication	2	0.0286	CDK1, CDK2
GO:0043583	ear development	2	0.0288	BCL2, MAPK1
GO:0043065	positive regulation of apoptotic process	3	0.0294	AKT1, BCL2, TNF
GO:0003008	system process	5	0.0307	AKT1, BCL2, EGFR, MAPK1, PRKCG
GO:0035239	tube morphogenesis	3	0.0307	BCL2, EGFR, PRKCA
GO:0045732	positive regulation of protein catabolic process	2	0.0319	AKT1, TNF
GO:0055080	cation homeostasis	3	0.0324	BCL2, EGFR, MAPK1
GO:0007411	axon guidance	2	0.0327	MAPK1, PRKCA
GO:0051129	negative regulation of cellular component organization	3	0.0327	AKT1, HGF, TNF
GO:0098771	inorganic ion homeostasis	3	0.0341	BCL2, EGFR, MAPK1
GO:0007281	germ cell development	2	0.035	AKT1, BCL2
GO:0030100	regulation of endocytosis	2	0.035	PRKCG, TNF
GO:0045926	negative regulation of growth	2	0.0365	BCL2, TNF
GO:0030336	negative regulation of cell migration	2	0.037	BCL2, STAT3
GO:1903311	regulation of mRNA metabolic process	2	0.0372	AKT1, PRKCA
GO:0050714	positive regulation of protein secretion	2	0.0377	EGFR, TNF
GO:0050877	nervous system process	4	0.0399	AKT1, EGFR, MAPK1, PRKCG
GO:0090596	sensory organ morphogenesis	2	0.0399	MAPK1, STAT3
GO:0048511	rhythmic process	2	0.0403	EGFR, PRKCG
GO:0010976	positive regulation of neuron projection development	2	0.0406	HGF, MAP2K1
GO:0006959	humoral immune response	2	0.0407	BCL2, TNF
GO:0051253	negative regulation of RNA metabolic process	4	0.0428	CDK2, STAT3, TERT, TNF
GO:0050768	negative regulation of neurogenesis	2	0.043	STAT3, TERT
GO:0051251	positive regulation of lymphocyte activation	2	0.043	AKT1, BCL2
GO:0009410	response to xenobiotic stimulus	2	0.0435	EGFR, PRKCG
GO:0002250	adaptive immune response	2	0.0489	PRKCB, STAT3
GO:0048871	multicellular organismal homeostasis	2	0.0498	BCL2, STAT3

## Sheet: Table S7
Table S7: Pathway enrichment analysis: 16 protein targets modulated 139 pathways
KEGG ID	Pathway	Genes within pathway	FDR	Gene ID
hsa01521	EGFR tyrosine kinase inhibitor resistance	11	6.37e-21	AKT1, BCL2, EGFR, HGF, IGF1R, MAP2K1, MAPK1, PRKCA, PRKCB, PRKCG, STAT3
hsa05200	Pathways in cancer	14	8.77e-19	AKT1, BCL2, CDK2, CDK6, EGFR, HGF, IGF1R, MAP2K1, MAPK1, PRKCA, PRKCB, PRKCG, STAT3, TERT
hsa05161	Hepatitis B	11	1.07e-18	AKT1, BCL2, CDK2, CDK6, MAP2K1, MAPK1, PRKCA, PRKCB, PRKCG, STAT3, TNF
hsa05225	Hepatocellular carcinoma	11	3.43e-18	AKT1, CDK6, EGFR, HGF, IGF1R, MAP2K1, MAPK1, PRKCA, PRKCB, PRKCG, TERT
hsa04066	HIF-1 signaling pathway	10	4.37e-18	AKT1, BCL2, EGFR, IGF1R, MAP2K1, MAPK1, PRKCA, PRKCB, PRKCG, STAT3
hsa05205	Proteoglycans in cancer	11	1.53e-17	AKT1, EGFR, HGF, IGF1R, MAP2K1, MAPK1, PRKCA, PRKCB, PRKCG, STAT3, TNF
hsa05223	Non-small cell lung cancer	9	2.85e-17	AKT1, CDK6, EGFR, MAP2K1, MAPK1, PRKCA, PRKCB, PRKCG, STAT3
hsa05214	Glioma	9	3.2e-17	AKT1, CDK6, EGFR, IGF1R, MAP2K1, MAPK1, PRKCA, PRKCB, PRKCG
hsa04510	Focal adhesion	10	1.95e-15	AKT1, BCL2, EGFR, HGF, IGF1R, MAP2K1, MAPK1, PRKCA, PRKCB, PRKCG
hsa05206	MicroRNAs in cancer	9	2.07e-14	BCL2, CDK6, EGFR, MAP2K1, MAPK1, PRKCA, PRKCB, PRKCG, STAT3
hsa04010	MAPK signaling pathway	10	7.51e-14	AKT1, EGFR, HGF, IGF1R, MAP2K1, MAPK1, PRKCA, PRKCB, PRKCG, TNF
hsa04015	Rap1 signaling pathway	9	2.54e-13	AKT1, EGFR, HGF, IGF1R, MAP2K1, MAPK1, PRKCA, PRKCB, PRKCG
hsa04071	Sphingolipid signaling pathway	8	3.22e-13	AKT1, BCL2, MAP2K1, MAPK1, PRKCA, PRKCB, PRKCG, TNF
hsa04151	PI3K-Akt signaling pathway	10	3.22e-13	AKT1, BCL2, CDK2, CDK6, EGFR, HGF, IGF1R, MAP2K1, MAPK1, PRKCA
hsa04014	Ras signaling pathway	9	5.6e-13	AKT1, EGFR, HGF, IGF1R, MAP2K1, MAPK1, PRKCA, PRKCB, PRKCG
hsa04150	mTOR signaling pathway	8	1.52e-12	AKT1, IGF1R, MAP2K1, MAPK1, PRKCA, PRKCB, PRKCG, TNF
hsa05218	Melanoma	7	1.52e-12	AKT1, CDK6, EGFR, HGF, IGF1R, MAP2K1, MAPK1
hsa05226	Gastric cancer	8	1.52e-12	AKT1, BCL2, CDK2, EGFR, HGF, MAP2K1, MAPK1, TERT
hsa04012	ErbB signaling pathway	7	3.28e-12	AKT1, EGFR, MAP2K1, MAPK1, PRKCA, PRKCB, PRKCG
hsa04540	Gap junction	7	4.26e-12	CDK1, EGFR, MAP2K1, MAPK1, PRKCA, PRKCB, PRKCG
hsa05215	Prostate cancer	7	8.39e-12	AKT1, BCL2, CDK2, EGFR, IGF1R, MAP2K1, MAPK1
hsa04933	AGE-RAGE signaling pathway in diabetic complications	7	8.58e-12	AKT1, BCL2, MAPK1, PRKCA, PRKCB, STAT3, TNF
hsa05231	Choline metabolism in cancer	7	8.58e-12	AKT1, EGFR, MAP2K1, MAPK1, PRKCA, PRKCB, PRKCG
hsa04725	Cholinergic synapse	7	1.81e-11	AKT1, BCL2, MAP2K1, MAPK1, PRKCA, PRKCB, PRKCG
hsa04068	FoxO signaling pathway	7	5.04e-11	AKT1, CDK2, EGFR, IGF1R, MAP2K1, MAPK1, STAT3
hsa04370	VEGF signaling pathway	6	5.23e-11	AKT1, MAP2K1, MAPK1, PRKCA, PRKCB, PRKCG
hsa04730	Long-term depression	6	5.53e-11	IGF1R, MAP2K1, MAPK1, PRKCA, PRKCB, PRKCG
hsa05212	Pancreatic cancer	6	1.75e-10	AKT1, CDK6, EGFR, MAP2K1, MAPK1, STAT3
hsa05165	Human papillomavirus infection	8	3.45e-10	AKT1, CDK2, CDK6, EGFR, MAP2K1, MAPK1, TERT, TNF
hsa04666	Fc gamma R-mediated phagocytosis	6	4.7e-10	AKT1, MAP2K1, MAPK1, PRKCA, PRKCB, PRKCG
hsa04914	Progesterone-mediated oocyte maturation	6	6.23e-10	AKT1, CDK1, CDK2, IGF1R, MAP2K1, MAPK1
hsa01522	Endocrine resistance	6	6.41e-10	AKT1, BCL2, EGFR, IGF1R, MAP2K1, MAPK1
hsa04919	Thyroid hormone signaling pathway	6	1.87e-09	AKT1, MAP2K1, MAPK1, PRKCA, PRKCB, PRKCG
hsa04650	Natural killer cell mediated cytotoxicity	6	2.8e-09	MAP2K1, MAPK1, PRKCA, PRKCB, PRKCG, TNF
hsa05224	Breast cancer	6	7.3e-09	AKT1, CDK6, EGFR, IGF1R, MAP2K1, MAPK1
hsa04921	Oxytocin signaling pathway	6	7.67e-09	EGFR, MAP2K1, MAPK1, PRKCA, PRKCB, PRKCG
hsa04720	Long-term potentiation	5	8.86e-09	MAP2K1, MAPK1, PRKCA, PRKCB, PRKCG
hsa04218	Cellular senescence	6	9.49e-09	AKT1, CDK1, CDK2, CDK6, MAP2K1, MAPK1
hsa04664	Fc epsilon RI signaling pathway	5	1.04e-08	AKT1, MAP2K1, MAPK1, PRKCA, TNF
hsa05164	Influenza A	6	1.39e-08	AKT1, MAP2K1, MAPK1, PRKCA, PRKCB, TNF
hsa05210	Colorectal cancer	5	3.1e-08	AKT1, BCL2, EGFR, MAP2K1, MAPK1
hsa04912	GnRH signaling pathway	5	3.57e-08	EGFR, MAP2K1, MAPK1, PRKCA, PRKCB
hsa04916	Melanogenesis	5	5.84e-08	MAP2K1, MAPK1, PRKCA, PRKCB, PRKCG
hsa05143	African trypanosomiasis	4	8.09e-08	PRKCA, PRKCB, PRKCG, TNF
hsa05145	Toxoplasmosis	5	9.32e-08	AKT1, BCL2, MAPK1, STAT3, TNF
hsa04726	Serotonergic synapse	5	1.04e-07	MAP2K1, MAPK1, PRKCA, PRKCB, PRKCG
hsa04960	Aldosterone-regulated sodium reabsorption	4	1.04e-07	MAPK1, PRKCA, PRKCB, PRKCG
hsa04114	Oocyte meiosis	5	1.18e-07	CDK1, CDK2, IGF1R, MAP2K1, MAPK1
hsa04270	Vascular smooth muscle contraction	5	1.31e-07	MAP2K1, MAPK1, PRKCA, PRKCB, PRKCG
hsa04140	Autophagy - animal	5	1.62e-07	AKT1, BCL2, IGF1R, MAP2K1, MAPK1
hsa04926	Relaxin signaling pathway	5	1.92e-07	AKT1, EGFR, MAP2K1, MAPK1, PRKCA
hsa05160	Hepatitis C	5	1.96e-07	AKT1, EGFR, MAPK1, STAT3, TNF
hsa04915	Estrogen signaling pathway	5	2.06e-07	AKT1, BCL2, EGFR, MAP2K1, MAPK1
hsa04210	Apoptosis	5	2.18e-07	AKT1, BCL2, MAP2K1, MAPK1, TNF
hsa04550	Signaling pathways regulating pluripotency of stem cells	5	2.38e-07	AKT1, IGF1R, MAP2K1, MAPK1, STAT3
hsa04072	Phospholipase D signaling pathway	5	2.97e-07	AKT1, EGFR, MAP2K1, MAPK1, PRKCA
hsa04934	Cushing's syndrome	5	3.78e-07	CDK2, CDK6, EGFR, MAP2K1, MAPK1
hsa05213	Endometrial cancer	4	4.58e-07	AKT1, EGFR, MAP2K1, MAPK1
hsa05230	Central carbon metabolism in cancer	4	6.96e-07	AKT1, EGFR, MAP2K1, MAPK1
hsa05221	Acute myeloid leukemia	4	7.25e-07	AKT1, MAP2K1, MAPK1, STAT3
hsa04062	Chemokine signaling pathway	5	7.95e-07	AKT1, MAP2K1, MAPK1, PRKCB, STAT3
hsa05211	Renal cell carcinoma	4	7.95e-07	AKT1, HGF, MAP2K1, MAPK1
hsa04917	Prolactin signaling pathway	4	8.12e-07	AKT1, MAP2K1, MAPK1, STAT3
hsa05167	Kaposi's sarcoma-associated herpesvirus infection	5	8.12e-07	AKT1, CDK6, MAP2K1, MAPK1, STAT3
hsa05203	Viral carcinogenesis	5	8.12e-07	CDK1, CDK2, CDK6, MAPK1, STAT3
hsa04662	B cell receptor signaling pathway	4	8.72e-07	AKT1, MAP2K1, MAPK1, PRKCB
hsa05169	Epstein-Barr virus infection	5	1.01e-06	AKT1, BCL2, CDK1, CDK2, STAT3
hsa05220	Chronic myeloid leukemia	4	1.1e-06	AKT1, CDK6, MAP2K1, MAPK1
hsa05222	Small cell lung cancer	4	2.26e-06	AKT1, BCL2, CDK2, CDK6
hsa04713	Circadian entrainment	4	2.32e-06	MAPK1, PRKCA, PRKCB, PRKCG
hsa05146	Amoebiasis	4	2.38e-06	PRKCA, PRKCB, PRKCG, TNF
hsa04660	T cell receptor signaling pathway	4	2.87e-06	AKT1, MAP2K1, MAPK1, TNF
hsa04620	Toll-like receptor signaling pathway	4	3.17e-06	AKT1, MAP2K1, MAPK1, TNF
hsa04931	Insulin resistance	4	3.77e-06	AKT1, PRKCB, STAT3, TNF
hsa04668	TNF signaling pathway	4	3.85e-06	AKT1, MAP2K1, MAPK1, TNF
hsa04724	Glutamatergic synapse	4	4.37e-06	MAPK1, PRKCA, PRKCB, PRKCG
hsa04722	Neurotrophin signaling pathway	4	4.94e-06	AKT1, BCL2, MAP2K1, MAPK1
hsa04380	Osteoclast differentiation	4	6.31e-06	AKT1, MAP2K1, MAPK1, TNF
hsa04728	Dopaminergic synapse	4	7.04e-06	AKT1, PRKCA, PRKCB, PRKCG
hsa05162	Measles	4	8.06e-06	AKT1, CDK2, CDK6, STAT3
hsa04261	Adrenergic signaling in cardiomyocytes	4	9.44e-06	AKT1, BCL2, MAPK1, PRKCA
hsa04723	Retrograde endocannabinoid signaling	4	1.17e-05	MAPK1, PRKCA, PRKCB, PRKCG
hsa05219	Bladder cancer	3	1.17e-05	EGFR, MAP2K1, MAPK1
hsa04630	Jak-STAT signaling pathway	4	1.57e-05	AKT1, BCL2, EGFR, STAT3
hsa04961	Endocrine and other factor-regulated calcium reabsorption	3	1.66e-05	PRKCA, PRKCB, PRKCG
hsa05152	Tuberculosis	4	2.02e-05	AKT1, BCL2, MAPK1, TNF
hsa04020	Calcium signaling pathway	4	2.33e-05	EGFR, PRKCA, PRKCB, PRKCG
hsa05031	Amphetamine addiction	3	4.07e-05	PRKCA, PRKCB, PRKCG
hsa04115	p53 signaling pathway	3	4.58e-05	CDK1, CDK2, CDK6
hsa04920	Adipocytokine signaling pathway	3	4.73e-05	AKT1, STAT3, TNF
hsa01524	Platinum drug resistance	3	4.87e-05	AKT1, BCL2, MAPK1
hsa05140	Leishmaniasis	3	4.87e-05	MAPK1, PRKCB, TNF
hsa04520	Adherens junction	3	4.97e-05	EGFR, IGF1R, MAPK1
hsa04971	Gastric acid secretion	3	5.12e-05	PRKCA, PRKCB, PRKCG
hsa04918	Thyroid hormone synthesis	3	5.27e-05	PRKCA, PRKCB, PRKCG
hsa04911	Insulin secretion	3	7.82e-05	PRKCA, PRKCB, PRKCG
hsa04970	Salivary secretion	3	8.28e-05	PRKCA, PRKCB, PRKCG
hsa04727	GABAergic synapse	3	8.76e-05	PRKCA, PRKCB, PRKCG
hsa05032	Morphine addiction	3	9.56e-05	PRKCA, PRKCB, PRKCG
hsa04750	Inflammatory mediator regulation of TRP channels	3	9.76e-05	PRKCA, PRKCB, PRKCG
hsa04064	NF-kappa B signaling pathway	3	9.97e-05	BCL2, PRKCB, TNF
hsa04925	Aldosterone synthesis and secretion	3	9.97e-05	PRKCA, PRKCB, PRKCG
hsa04972	Pancreatic secretion	3	0.0001	PRKCA, PRKCB, PRKCG
hsa04070	Phosphatidylinositol signaling system	3	0.00011	PRKCA, PRKCB, PRKCG
hsa05142	Chagas disease (American trypanosomiasis)	3	0.00012	AKT1, MAPK1, TNF
hsa04670	Leukocyte transendothelial migration	3	0.00016	PRKCA, PRKCB, PRKCG
hsa04110	Cell cycle	3	0.00021	CDK1, CDK2, CDK6
hsa04371	Apelin signaling pathway	3	0.00026	AKT1, MAP2K1, MAPK1
hsa04910	Insulin signaling pathway	3	0.00026	AKT1, MAP2K1, MAPK1
hsa05418	Fluid shear stress and atherosclerosis	3	0.00026	AKT1, BCL2, TNF
hsa04310	Wnt signaling pathway	3	0.00031	PRKCA, PRKCB, PRKCG
hsa04217	Necroptosis	3	0.00039	BCL2, STAT3, TNF
hsa04022	cGMP-PKG signaling pathway	3	0.00043	AKT1, MAP2K1, MAPK1
hsa04621	NOD-like receptor signaling pathway	3	0.00047	BCL2, MAPK1, TNF
hsa05020	Prion diseases	2	0.00053	MAP2K1, MAPK1
hsa05168	Herpes simplex infection	3	0.00059	CDK1, CDK2, TNF
hsa05216	Thyroid cancer	2	0.00064	MAP2K1, MAPK1
hsa04024	cAMP signaling pathway	3	0.00072	AKT1, MAP2K1, MAPK1
hsa04973	Carbohydrate digestion and absorption	2	0.0008	AKT1, PRKCB
hsa04810	Regulation of actin cytoskeleton	3	0.00082	EGFR, MAP2K1, MAPK1
hsa04930	Type II diabetes mellitus	2	0.00094	MAPK1, TNF
hsa05144	Malaria	2	0.00097	HGF, TNF
hsa05014	Amyotrophic lateral sclerosis (ALS)	2	0.0011	BCL2, TNF
hsa05166	HTLV-I infection	3	0.0014	AKT1, TERT, TNF
hsa04060	Cytokine-cytokine receptor interaction	3	0.0016	EGFR, HGF, TNF
hsa04213	Longevity regulating pathway - multiple species	2	0.0016	AKT1, IGF1R
hsa05321	Inflammatory bowel disease (IBD)	2	0.0016	STAT3, TNF
hsa05133	Pertussis	2	0.0022	MAPK1, TNF
hsa04350	TGF-beta signaling pathway	2	0.0027	MAPK1, TNF
hsa04211	Longevity regulating pathway	2	0.0031	AKT1, IGF1R
hsa04657	IL-17 signaling pathway	2	0.0033	MAPK1, TNF
hsa04659	Th17 cell differentiation	2	0.004	MAPK1, STAT3
hsa04152	AMPK signaling pathway	2	0.0054	AKT1, IGF1R
hsa04611	Platelet activation	2	0.0056	AKT1, MAPK1
hsa05034	Alcoholism	2	0.0074	MAP2K1, MAPK1
hsa04932	Non-alcoholic fatty liver disease (NAFLD)	2	0.008	AKT1, TNF
hsa05010	Alzheimer's disease	2	0.01	MAPK1, TNF
hsa04360	Axon guidance	2	0.0105	MAPK1, PRKCA
hsa04144	Endocytosis	2	0.0196	EGFR, IGF1R

## Sheet: Table S8
Table S8: Role of 16 protein targets in the pathogenesis of hepatitis B viral infection and hepato cellular carcinoma (HCC)
Gene ID	Role of gene
AKT1	RAC-alpha serine/threonine-protein kinase; AKT1 is one of 3 closely related serine/threonine- protein kinases called the AKT kinase, and which regulate many processes including metabolism, proliferation, cell survival, growth and angiogenesis. This is mediated through serine and/or threonine phosphorylation of a range of downstream substrates. The replication of hepatitis B virus (HBV) modulated …
EGFR	Epidermal growth factor receptor; EGFR is a host-entry cofactor triggering NTCP-mediated hepatitis B virus internalization (Iwamoto et al 2019)
IGF1R	Insulin-like growth factor I receptor; HBx-mediates upregulation of IGF-2 and IGF-1R expression, changes in IGF binding proteines expression levels have been associated with HBV infection and progression of HCC (Nielsen et al 2018)
CDK1	Hepatitis B virus X protein (HBx) induces G2/M arrest and apoptosis through sustained activation of cyclin B1-CDK1 kinase (Cheng et al 2009). Host CDK activities are likely required for HBV cccDNA synthesis (Bao et al 2019)
CDK6	A novel long noncoding RNA (lncRNA) DBH-AS1 involved in the HBx-mediated hepatocarcinogenesis. The levels of DBH-AS1 were positively correlated with hepatitis B surface antigen (HBsAg) and tumor size in HCC tissues. Overexpression of DBH-AS1 induced cell cycle progression by accelerating G1/S and G2/M transition concomitantly with upregulation of CDK6, CCND1, CCNE1 and downregulation of p16, p21 …
HGF	Hepatocyte growth factor (HGF) is a driver of Hepatitis B indiced HCC progression and serve as an effective biomarker for Met-targeted therapy. Targeting the Met pathway in hepatitis B–induced HCC is a therapeutic approach. Overexpression of HGF causes HCC (Xie et al 2013)
TERT	Hepatitis B X Interacting Protein (HBXIP) upregulates the expression and activity of hTERT in hepatoma cells, suggesting that hTERT associated with hepatocellular carcinoma (Zhang et al 2006). Importantly, researchers discovered that 68% of HCC cases had telomerase reverse transcriptase (TERT) genetic alterations, including promoter mutation, focal amplification, and viral genome integration, and…
BCL2	Hepatitis B virus X protein targets Bcl-2 proteins to increase intracellular calcium, required for virus replication and cell death induction. Bcl-2 proteins are key cellular targets of HBx during HBV pathogenesis (Gang et al 2012)
CDK2	Hepatitis B X Interacting Protein (HBx) activates the cyclin A promoter, induce cyclin A–cyclin-dependent kinase 2 complexes, and promote cycling of growth-arrested cells into G1 through a pathway involving activation of Src tyrosine kinases. HBx stimulation of Src kinases and cyclin gene expression was found to force growth-arrested cells to transit through G1 but to stall at the junction with S…
STAT3	Signal transducer and activator of transcription 3; HBV activates STAT3 signaling in hepatocytes to foster its own replication but also to prevent apoptosis of infected cells. This very likely supports HBV-related carcinogenesis (Hosel et al 2017)
MAPK1, MAP2K1	Dual specificity mitogen-activated protein kinase kinase 1/2; Dual specificity protein kinase which acts as an essential component of the MAP kinase signal transduction pathway. Both MAP2K1/MEK1 and MAP2K2/MEK2 function specifically in the MAPK/ERK cascade. Depending on the cellular context, the MAPK/ERK cascade mediates diverse biological functions such as cell growth, adhesion, survival and dif…
PRKCB	Protein kinase C beta type; Calcium-activated, phospholipid- and diacylglycerol (DAG)-dependent serine/threonine-protein kinase involved in various cellular processes such as oxidative stress-induced apoptosis, insulin signaling and endothelial cells proliferation. Plays a key role in B-cell activation by regulating BCR-induced NF-kappa-B activation. Mediates the activation of the canonical NF-ka…
TNF	Tumor necrosis factor; Interaction between TNF-α C863T polymorphisms and HBV infection associated with progression of HCC (Xiao et al 2016)
PRKCA, PRKCG	Protein kinase C alpha type; Calcium-activated, phospholipid- and diacylglycerol (DAG)-dependent serine/threonine-protein kinase that is involved in positive and negative regulation of cell proliferation, apoptosis, differentiation, migration and adhesion, tumorigenesis, cardiac hypertrophy, angiogenesis, platelet function and inflammation, by directly phosphorylating targets such as RAF1, BCL2, …
References
Xiang et al 2018	Xiang K, Wang B. Role of the PI3K‑AKT‑mTOR pathway in hepatitis B virus infection and replication. Molecular medicine reports. 2018 Mar 1;17(3):4713-9.
Park et al 2000	Park US, Park SK, Lee YI, Park JG, Lee YI. Hepatitis B virus-X protein upregulates the expression of p21 wafl/cipl and prolongs G1→ S transition via a p53-independent pathway in human hepatoma cells. Oncogene. 2000 Jul;19(30):3384-94.
Iwamoto et al 2019	Iwamoto M, Saso W, Sugiyama R, Ishii K, Ohki M, Nagamori S, Suzuki R, Aizaki H, Ryo A, Yun JH, Park SY. Epidermal growth factor receptor is a host-entry cofactor triggering hepatitis B virus internalization. Proceedings of the National Academy of Sciences. 2019 Apr 23;116(17):8487-92.
Xiao et al 2016	Xiao Q, Fu B, Chen P, Liu ZZ, Wang W, Ye Q. Three polymorphisms of tumor necrosis factor-alpha and hepatitis B virus related hepatocellular carcinoma: A meta-analysis. Medicine. 2016 Dec;95(50).
Nielsen et al 2018	Nielsen KO, Mirza AH, Kaur S, Jacobsen KS, Winther TN, Glebe D, Pociot F, Hogh B, Størling J. Hepatitis B virus suppresses the secretion of insulin-like growth factor binding protein 1 to facilitate anti-apoptotic IGF-1 effects in HepG2 cells. Experimental cell research. 2018 Sep 15;370(2):399-408.
Cheng et al 2009	Cheng P, Li Y, Yang L, Wen Y, Shi W, Mao Y, Chen P, Lv H, Tang Q, Wei Y. Hepatitis B virus X protein (HBx) induces G2/M arrest and apoptosis through sustained activation of cyclin B1-CDK1 kinase. Oncology reports. 2009 Nov 1;22(5):1101-7.
Bao et al 2019	Bao CY, Hung HC, Chen YW, Fan CY, Huang CJ, Huang W. Requirement of cyclin-dependent kinase function for hepatitis B virus cccDNA synthesis as measured by digital PCR. Annals of Hepatology. 2019 Dec 28.
Huang et al 2015	Huang JL, Ren TY, Cao SW, Zheng SH, Hu XM, Hu YW, Lin L, Chen J, Zheng L, Wang Q. HBx-related long non-coding RNA DBH-AS1 promotes cell proliferation and survival by activating MAPK signaling in hepatocellular carcinoma. Oncotarget. 2015 Oct 20;6(32):33791.
Xie et al 2013	Xie Q, Su Y, Dykema K, Johnson J, Koeman J, De Giorgi V, Huang A, Schlegel R, Essenburg C, Kang L, Iwaya K. Overexpression of HGF promotes HBV-induced hepatocellular carcinoma progression and is an effective indicator for Met-targeting therapy. Genes & cancer. 2013 Jul;4(7-8):247-60.
Zhang et al 2006	Zhang X, Zhang H, Ye L. Effects of hepatitis B virus X protein on the development of liver cancer. Journal of Laboratory and Clinical Medicine. 2006 Feb 1;147(2):58-66.
Tornesello et al 2016	Tornesello ML, Buonaguro L, Izzo F, Buonaguro FM. Molecular alterations in hepatocellular carcinoma associated with hepatitis B and hepatitis C infections. Oncotarget. 2016 May 3;7(18):25087.
Zhou et al 2013	Zhou Y, Zhu N, Wang X, Wang L, Gu LJ, Yuan WJ. The role of the toll-like receptor TLR4 in hepatitis B virus-associated glomerulonephritis. Archives of virology. 2013 Feb 1;158(2):425-33.
Gang et al 2012	Geng X, Huang C, Qin Y, McCombs JE, Yuan Q, Harry BL, Palmer AE, Xia NS, Xue D. Hepatitis B virus X protein targets Bcl-2 proteins to increase intracellular calcium, required for virus replication and cell death induction. Proceedings of the National Academy of Sciences. 2012 Nov 6;109(45):18471-6.
Bouchard et al 2001	Bouchard M, Giannakopoulos S, Wang EH, Tanese N, Schneider RJ. Hepatitis B virus HBx protein activation of cyclin A–cyclin-dependent kinase 2 complexes and G1 transit via a Src kinase pathway. Journal of virology. 2001 May 1;75(9):4247-57.
Hosel et al 2017	Hösel M, Quasdorff M, Ringelhan M, Kashkar H, Debey-Pascher S, Sprinzl MF, Bockmann JH, Arzberger S, Webb D, von Olshausen G, Weber A. Hepatitis B virus activates signal transducer and activator of transcription 3 supporting hepatocyte survival and virus replication. Cellular and molecular gastroenterology and hepatology. 2017 Nov 1;4(3):339-63.
Guégan et al 2012	Guégan JP, Frémin C, Baffet G. The MAPK MEK1/2-ERK1/2 pathway and its implication in hepatocyte cell cycle control. International journal of hepatology. 2012 Oct 24;2012.
Stockl et al 2003	Stöckl L, Berting A, Malkowski B, Foerste R, Hofschneider PH, Hildt E. Integrity of c-Raf-1/MEK signal transduction cascade is essential for hepatitis B virus gene expression. Oncogene. 2003 May;22(17):2604-10.
Ma et al 2011	Ma J, Sun T, Park S, Shen G, Liu J. The role of hepatitis B virus X protein is related to its differential intracellular localization. Acta Biochim Biophys Sin. 2011 Aug 1;43(8):583-8.
Cai et al 2017	Cai J, Liu T, Jiang X, Guo C, Liu A, Xiao X. Downregulation of USP18 inhibits growth and induces apoptosis in hepatitis B virus-related hepatocellular carcinoma cells by suppressing BCL2L1. Experimental cell research. 2017 Sep 15;358(2):315-22.

## Sheet: Table S9
Table S9: Interaction of phytocompounds with protein targets and pathways and Edge Count w.r.t. protein target
Compound(s) name	Targeted Protein name	Pathways modulated by Protein target	Edge Count w.r.t. Protein
3-Glucosylkaempferol, 3-Glucosylquercetin, 5-Hydroxy-782'3'- Tetramethoxyflavone, 5-Hydroxy-782'-Trimethoxyflavone, Gossypetin, Herbacetin, Isorhamnetin, Kaempferol 8-C-sulfate, Kaempferol-7- Glucoside, Luteolin-7-Mono-Beta-D-Glucoside, Pelargonidin 5-galactoside, Pinnatin, Pongamone A, Altisin, 2'-hydroxy-5,7,8- trimethoxyflavone, 5- hydroxy-7,8,2',3',4'- pentamethoxyflavone, Wightin, Skullcapfl…	EGFR	Hepatocellular carcinoma, MicroRNAs in cancer, MAPK signaling pathway, PI3K-Akt signaling pathway, EGFR tyrosine kinase inhibitor resistance, Ras signaling pathway, Jak-STAT signaling pathway	29
5-Hydroxy-782'3'-Tetramethoxyflavone, 5-Hydroxy-782'- Trimethoxyflavone, Gossypetin, Herbacetin, Isorhamnetin, Pinnatin, Altisin, 2'-hydroxy-5,7,8- trimethoxyflavone, 5-hydroxy-7,8,2',3',4'- pentamethoxyflavone, Wightin, 5-hydroxy-7,8-dimethoxyflavone, Skullcapflavone I, 5-hydroxy-7,8,2',5'- tetramethoxyflavone, 5,4'-dihydroxy-7,8,2',3'- tetramethoxyflavone	CDK6	Hepatitis B, Hepatocellular carcinoma, MicroRNAs in cancer, PI3K-Akt signaling pathway, Viral carcinogenesis, p53 signaling pathway, Cell cycle	21
5-Hydroxy-782'3'-Tetramethoxyflavone, 5-Hydroxy-782'- Trimethoxyflavone, Gossypetin, Herbacetin, Isorhamnetin, Pinnatin, Altisin, 2'-hydroxy-5,7,8- trimethoxyflavone, 5-hydroxy-7,8,2',3',4'- pentamethoxyflavone, Wightin, 5-hydroxy-7,8-dimethoxyflavanone, 5-hydroxy-7,8-dimethoxyflavone, Skullcapflavone I, 5-hydroxy-7,8,2',5'- tetramethoxyflavone, 5,4'-dihydroxy-7,8,2',3'- tetramethoxyflavone	HGF	EGFR tyrosine kinase inhibitor resistance, Hepatocellular carcinoma, MAPK signaling pathway, PI3K-Akt signaling pathway, Ras signaling pathway	20
5-Hydroxy-782'3'-Tetramethoxyflavone, 5-Hydroxy-782'- Trimethoxyflavone, Gossypetin, Herbacetin, Isorhamnetin, Pinnatin, Altisin, 2'-hydroxy-5,7,8- trimethoxyflavone, 5-hydroxy-7,8,2',3',4'- pentamethoxyflavone, Wightin, 5-hydroxy-7,8-dimethoxyflavone, Skullcapflavone I, 5-hydroxy-7,8,2',5'- tetramethoxyflavone, 5,4'-dihydroxy-7,8,2',3'- tetramethoxyflavone	IGF1R	EGFR tyrosine kinase inhibitor resistance, Hepatocellular carcinoma, MAPK signaling pathway, PI3K-Akt signaling pathway, Ras signaling pathway, mTOR signaling pathway	20
5-Hydroxy-782'3'-Tetramethoxyflavone, 5-Hydroxy-782'- Trimethoxyflavone, Gossypetin, Herbacetin, Isorhamnetin, Pinnatin, Altisin, Altisin, 2'-hydroxy-5,7,8- trimethoxyflavone, 2'-hydroxy-5,7,8- trimethoxyflavone, 5-hydroxy-7,8,2',3',4'- pentamethoxyflavone, 5-hydroxy-7,8,2',3',4'- pentamethoxyflavone, Wightin, Wightin, 5-hydroxy-7,8-dimethoxyflavone, 5-hydroxy-7,8-dimethoxyflavone, Skullcapflavon…	CDK1	Viral carcinogenesis, p53 signaling pathway, Cell cycle	17
3-Glucosylkaempferol, 3-Glucosylquercetin, Aloenin, Cyanidin 3- arabinoside, Kaempferol-7-Glucoside, Luteolin-7-Mono-Beta-D-Glucoside, Myrtillin, Pelargonidin 5-galactoside, Peonidin galactoside, Petunidin 3-glucoside, Tiliroside, Andrographidine C	TNF	Hepatitis B, MAPK signaling pathway, mTOR signaling pathway, Apoptosis, TNF signaling pathway	17
5-Hydroxy-782'3'-Tetramethoxyflavone, 5-Hydroxy-782'- Trimethoxyflavone, Gossypetin, Herbacetin, Isorhamnetin, Pinnatin, Altisin, 2'-hydroxy-5,7,8- trimethoxyflavone, 5-hydroxy-7,8,2',3',4'- pentamethoxyflavone, Wightin, 5-hydroxy-7,8-dimethoxyflavanone, 5- hydroxy-7,8-dimethoxyflavone, Skullcapflavone I, 5-hydroxy-7,8,2',5'-tetramethoxyflavone, 5,4'-dihydroxy-7,8,2',3'- tetramethoxyflavone	TERT	Hepatocellular carcinoma	16
2-Methyl-2-Phytyl-6-Chromanol, 5-hydroxy-7,8-dimethoxyflavanone	AKT1	EGFR tyrosine kinase inhibitor resistance, Hepatitis B, Hepatocellular carcinoma, MAPK signaling pathway, PI3K-Akt signaling pathway, Ras signaling pathway, mTOR signaling pathway, Apoptosis, TNF signaling pathway, Jak-STAT signaling pathway	12
Feralolide	MAPK1	EGFR tyrosine kinase inhibitor resistance, Hepatitis B, Hepatocellular carcinoma, MicroRNAs in cancer, MAPK signaling pathway, PI3K-Akt signaling pathway, Ras signaling pathway, mTOR signaling pathway, Apoptosis, Viral carcinogenesis, TNF signaling pathway	12
Feralolide	MAP2K1	EGFR tyrosine kinase inhibitor resistance, Hepatitis B, Hepatocellular carcinoma, MicroRNAs in cancer, MAPK signaling pathway, PI3K-Akt signaling pathway, Ras signaling pathway, mTOR signaling pathway,Apoptosis, TNF signaling pathway	11
Paniculide-B, Paniculide-B, Paniculide-B, Andrographiside, Andrographiside	PRKCA	EGFR tyrosine kinase inhibitor resistance, Hepatitis B, Hepatocellular carcinoma, MicroRNAs in cancer, MAPK signaling pathway, PI3K-Akt signaling pathway, Ras signaling pathway, mTOR signaling pathway	10
Paniculide-B, Andrographiside	PRKCB	EGFR tyrosine kinase inhibitor resistance, Hepatitis B, Hepatocellular carcinoma, MicroRNAs in cancer, MAPK signaling pathway, Ras signaling pathway, mTOR signaling pathway	9
Paniculide-B, Andrographiside	PRKCG	EGFR tyrosine kinase inhibitor resistance, Hepatitis B, Hepatocellular carcinoma, MicroRNAs in cancer, MAPK signaling pathway, Ras signaling pathway, mTOR signaling pathway	9
Gossypetin, Herbacetin, Isorhamnetin	CDK2	Hepatitis B, PI3K-Akt signaling pathway, Viral carcinogenesis, p53 signaling pathway, Cell cycle	8
Aloe-Emodin	BCL2	EGFR tyrosine kinase inhibitor resistance, Hepatitis B, MicroRNAs in cancer, PI3K-Akt signaling pathway, Apoptosis, Jak-STAT signaling pathway	7
Neoandrographolide, Andrographiside	STAT3	EGFR tyrosine kinase inhibitor resistance, Hepatitis B, MicroRNAs in cancer, Viral carcinogenesis, Jak-STAT signaling pathway	7
